# Supplementary material for: Copper-catalyzed ring-opening sulfonylation of cyclopropanols via the insertion of sulfur dioxide toward the synthesis of γ-keto aryl sulfones
Source: Royal Society of Chemistry journal article supplement (doi:10.1039/d3qo00552f), 2023-01-01

# Copper-Catalyzed Ring-Open Sulfonylation of Cyclopropanols via the Insertion of Sulfur Dioxide toward the Synthesis of $\gamma$ -Keto Aryl Sulfones

Lin Shen,<sup>§</sup> Xuemei Zhang,<sup>§</sup> and Zhong Lian\*

Department of Dermatology & Venerology and State Key Laboratory of Biotherapy, West China Hospital, Sichuan University, Chengdu 610041, China.

Email: lianzhong@scu.edu.cn

<sup>§</sup> These authors contributed equally.

## *Supporting Information*

### Contents

|                                                                                                        |    |
|--------------------------------------------------------------------------------------------------------|----|
| 1. General information .....                                                                           | 2  |
| 2. General procedures for the synthesis of diazonium salts 1 .....                                     | 2  |
| 3. General procedures for the synthesis of Cyclopropanols 2 .....                                      | 2  |
| 4. General procedures for the synthesis of $\gamma$ -keto arylsulfones 3 .....                         | 4  |
| 5. Characterization data of products.....                                                              | 4  |
| 6. Gram-scale reaction and transformation of $\gamma$ -keto arylsulfones .....                         | 12 |
| 7. Mechanistic studies .....                                                                           | 14 |
| 8. References .....                                                                                    | 16 |
| 9. Copies of <sup>1</sup> H NMR, <sup>19</sup> F NMR and <sup>13</sup> C NMR spectra of products ..... | 17 |

## General information.

All reactions were carried out in oven dried two-chamber under argon atmosphere glovebox (Vigor, SGI800-750TS-F). All of Aryl diazonium salts were prepared according to the literature<sup>1</sup>. Unless otherwise stated, all commercially available compounds were purchased from the reagent company. <sup>1</sup>H, <sup>19</sup>F, <sup>13</sup>C NMR spectra were recorded in CDCl<sub>3</sub> or (CD<sub>3</sub>)<sub>2</sub>SO on Bruker Avance 400 MHz spectrometers. NMR spectra were taken using TMS (δ = 0), CDCl<sub>3</sub> (δ = 7.26), and CDCl<sub>3</sub> (<sup>13</sup>C, CPD δ = 77.0) as the internal standards, respectively. High-resolution mass spectrometric measurements were provided by School of Chemistry, Sichuan University, The molecular ion [M+H]<sup>+</sup>, [M]<sup>+</sup> and [M+Na]<sup>+</sup> are given in m/z units. Flash column chromatography was performed on silica gel (particle size 200-300 mesh) and eluted with petroleum ether/ethyl acetate.

## General procedures for the synthesis of diazonium salts 1

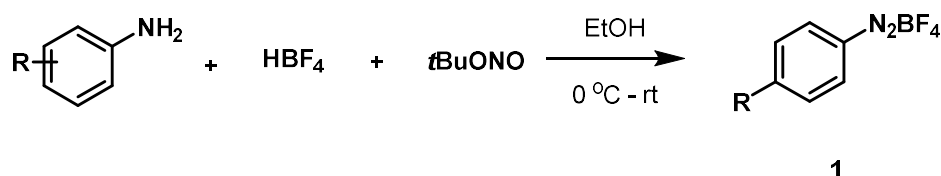

Substrates **1** were synthesized according to the literature procedures<sup>1</sup>: In a 50 mL round-bottom flask, the aniline (5 mmol) was dissolved in a mixture of absolute ethanol (1.5 mL) and an aqueous solution of HBF<sub>4</sub> (48% aq, 1.25 mL), followed by dropwise addition of *t*BuONO (1.35 mL) at 0 °C. After stirring at room temperature for 1 h, diethyl ether (5 mL) was added to precipitate the arenediazonium tetrafluoroborates (Note: If there is no solid formed after adding diethyl ether, put the flask in the refrigerator overnight). The solids were filtered off and washed with diethyl ether (3×5 mL), dried in vacuo for 25 minutes, and stored in refrigerator.

## General procedures for the synthesis of Cyclopropanols 2

### General procedure A

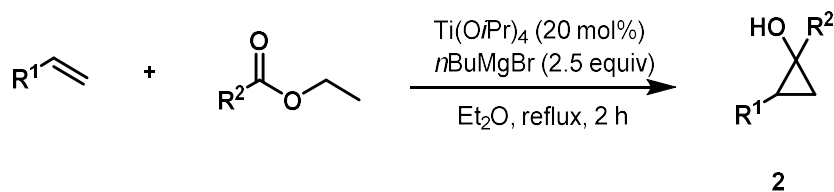

Substrates **2** were synthesized according to the literature procedures<sup>2</sup>: To a solution of ester (10 mmol), styrene (11 mmol, 1.1 equiv) and Ti(O*i*Pr)<sub>4</sub> (2 mmol, 0.35 mL, 0.2 equiv) in Et<sub>2</sub>O (15 mL), a solution of *n*BuMgBr (25 mmol, 2.5 equiv) in Et<sub>2</sub>O (12 mL)

was added dropwisely over 1 h at reflux. The mixture was stirred for an additional 1 h, and then poured into ice-cold aqueous solution of hydrochloric acid (50 mL, 1M). The organic layer was separated and the aqueous layer was extracted with ether (2×20 mL). The combined organic extracts were washed with saturated NaHCO<sub>3</sub> aq., dried over Na<sub>2</sub>SO<sub>4</sub> and concentrated under reduced pressure, and the residue was purified by column chromatography on silica gel with a gradient eluent of petroleum ether and ethyl acetate (~ 10: 1) to give the desired product **2**.

Notes: Cyclopropanols are not stable when chromatography on silica gel, so products were purified by column chromatography quickly, and stored in glovebox at a -20 °C freezer.

### General procedure B

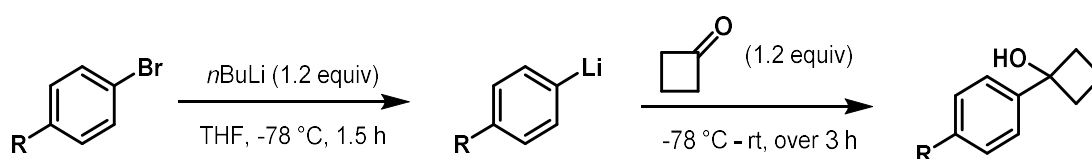

Following the literature procedure<sup>3</sup>, a flame-dried round bottom flask charged with 5 mmol of aryl/alkyl bromide (commercially available reagents were used without further purification) in 15 mL THF was cooled to -78 °C and 2.4 mL of *n*BuLi (2.5 M in hexane, 6 mmol, 1.2 equiv) was added dropwise via syringe. The mixture was stirred for 0.5 h at -78 °C before the addition of the corresponding ketone (5 mmol, 1.0 equiv), then the mixture was warmed to room temperature and stirred over 3 h. The ammonium chloride solution was then added to quench the reaction and extracted with ethyl acetate (3 x 30 mL), washed with sodium chloride solution, and dried over Na<sub>2</sub>SO<sub>4</sub>. After filtration and concentration, the residue was purified by column chromatography (PE/EA) to afford the products.

### General procedure C

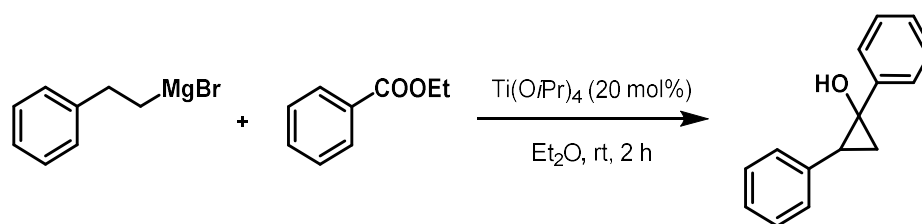

Following the literature procedure<sup>4</sup>, a flame-dried round bottom flask charged with 5 mmol of ethyl benzoate and 1 mmol of titanium tetraisopropanolate in 10 mL Et<sub>2</sub>O, then 10 mL of Grignard reagent (0.5 M in THF, 5 mmol, 1.0 equiv) was added dropwise via syringe. The mixture was stirred for 2 h at room temperature. The 1.0 M hydrochloric acid solution was then added to quench the reaction and extracted with ethyl acetate (3 x 30 mL), washed with sodium chloride solution, and dried over Na<sub>2</sub>SO<sub>4</sub>. After filtration and concentration, the residue was purified by column chromatography (PE/EA) to afford the products.

## General procedures for the synthesis of $\gamma$ -keto aryl sulfones **3**

**Chamber A:** for SO<sub>2</sub> gas generation

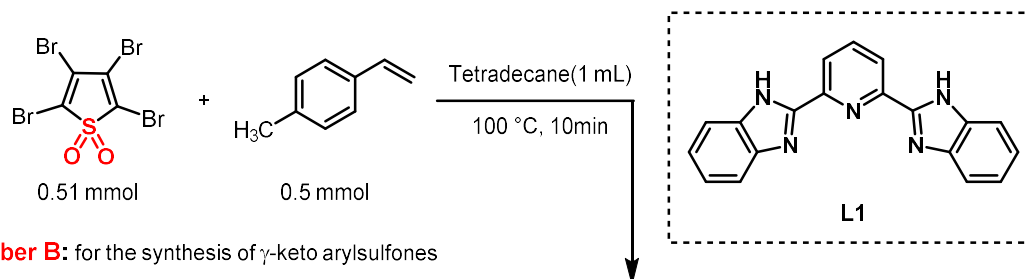

**Chamber B:** for the synthesis of  $\gamma$ -keto arylsulfones

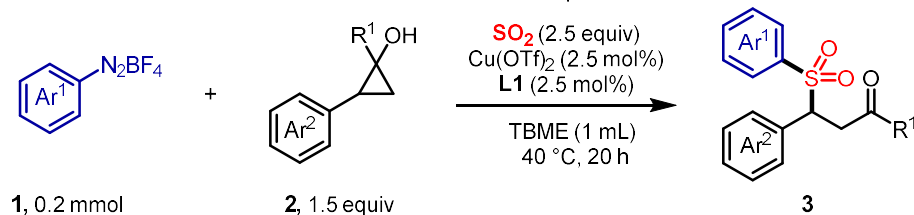

In an argon fulfilled glovebox, tetrabromothiophene S, S-dioxides (0.51 mmol, 237.4 mg) and 1-methyl-4-vinylbenzene (0.5 mmol, 66  $\mu$ L) were added into chamber A with a magnetic stirring bar, followed by addition of tetradecane (1.0 mL). Diazonium salts **1** (0.2 mmol), Cyclopropanols **2** (0.3 mmol, 1.5 equiv.), Cu(OTf)<sub>2</sub> (2.5 mol%, 1.8 mg) and **L1** (1.6 mg, 2.5 mol%) were added into chamber B with a magnetic stirring bar, followed by addition of MTBE (1.0 mL). The two-chamber was sealed and removed out of the glovebox, then chamber A was allowed to heated to 100 °C in heat block. About ten minutes later, the sulfur dioxide was completely released since the system in chamber A became clear. Then chamber B was heated to 40 °C in heat block. Upon completion, the mixture in chamber B was passed through a short silica gel pad with ethyl acetate. The filtrate was washed by ethyl acetate and H<sub>2</sub>O (15 mL $\times$ 3), dried by Na<sub>2</sub>SO<sub>4</sub>, then concentrated and the residue was purified by flash column chromatography to afford pure products **3**.

## Characterization data of products

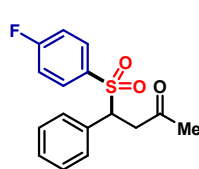

**4-((4-fluorophenyl)sulfonyl)-4-phenylbutan-2-one (3a)** Prepared by general procedure; isolated as a pale yellow solid using petroleum/ethyl acetate (5:1) as eluent (51 mg, 84%). <sup>1</sup>H NMR (400 MHz, Chloroform-*d*)  $\delta$  7.43 - 7.40 (m, 2H), 7.20 - 7.13 (m, 3H), 7.04 - 7.03 (m, 2H), 6.99 - 6.95 (m, 2H), 4.64 (dd,  $J$  = 9.2, 4.4 Hz, 1H), 3.54 (dd,  $J$  = 18.0, 4.4 Hz, 1H), 3.21 (dd,  $J$  = 17.6, 8.8 Hz, 1H), 2.10 (s, 3H). <sup>19</sup>F NMR (376 MHz, CDCl<sub>3</sub>)  $\delta$  -103.2. <sup>13</sup>C NMR (101 MHz, CDCl<sub>3</sub>)  $\delta$  203.1, 165.8 (d,  $J$  = 257.6 Hz), 132.8 (d,  $J$  = 3.0 Hz), 132.4, 131.9 (d,  $J$  = 9.1 Hz), 129.7, 129.0, 128.6, 116.1 (d,  $J$  = 23.2 Hz), 66.3, 41.3, 30.5. HRMS (ESI/Q-TOF)  $m/z$ : [M+Na]<sup>+</sup> calcd for

C<sub>16</sub>H<sub>15</sub>FO<sub>3</sub>SNa 329.0618; Found:329.0620.

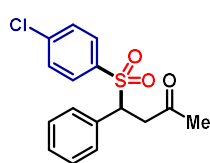

**4-((4-chlorophenyl)sulfonyl)-4-phenylbutan-2-one (3b)** Prepared by general procedure; isolated as a white solid using petroleum/ethyl acetate (5:1) as eluent (50 mg, 77%). <sup>1</sup>H NMR (400 MHz, Chloroform-*d*) δ 7.34 (d, *J* = 8.4 Hz, 2H), 7.27 (d, *J* = 8.4 Hz, 2H), 7.21 – 7.14 (m, 3H), 7.04 (d, *J* = 6.8 Hz, 2H), 4.65 (dd, *J* = 8.8, 4.4 Hz, 1H), 3.53 (dd, *J* = 18.0, 4.4 Hz, 1H), 3.20 (dd, *J* = 17.6, 8.8 Hz, 1H), 2.10 (s, 3H). <sup>13</sup>C NMR (101 MHz, CDCl<sub>3</sub>) δ 203.0, 140.6, 135.4, 132.2, 130.4, 129.7, 129.1, 129.1, 128.7, 66.3, 41.3, 30.5. HRMS (ESI/Q-TOF) *m/z*: [M+Na]<sup>+</sup> calcd for C<sub>16</sub>H<sub>15</sub>ClO<sub>3</sub>SNa 345.0323; Found: 345.0319.

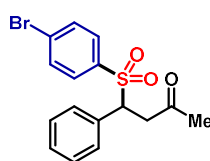

**4-((4-bromophenyl)sulfonyl)-4-phenylbutan-2-one (3c)** Prepared by general procedure; isolated as a pale yellow solid using petroleum/ethyl acetate (5:1) as eluent (62 mg, 70%). <sup>1</sup>H NMR (400 MHz, Chloroform-*d*) δ 7.44 (d, *J* = 8.4 Hz, 2H), 7.26 (d, *J* = 8.8 Hz, 2H), 7.21 – 7.14 (m, 3H), 7.04 (d, *J* = 7.2 Hz, 2H), 4.65 (dd, *J* = 8.8, 4.0 Hz, 1H), 3.52 (dd, *J* = 18.0, 4.4 Hz, 1H), 3.20 (dd, *J* = 17.6, 8.8 Hz, 1H), 2.10 (s, 3H). <sup>13</sup>C NMR (101 MHz, CDCl<sub>3</sub>) δ 203.0, 135.9, 132.2, 132.0, 130.5, 129.7, 129.2, 129.1, 128.7, 66.2, 41.3, 30.5. HRMS (ESI/Q-TOF) *m/z*: [M+Na]<sup>+</sup> calcd for C<sub>16</sub>H<sub>15</sub>BrO<sub>3</sub>SNa 388.9817; Found: 388.9818.

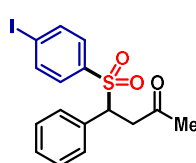

**4-((4-iodophenyl)sulfonyl)-4-phenylbutan-2-one (3d)** Prepared by general procedure; isolated as a pale yellow solid using petroleum/ethyl acetate (5:1) as eluent (77 mg, 94%). <sup>1</sup>H NMR (400 MHz, Chloroform-*d*) δ 7.66 (d, *J* = 8.4 Hz, 2H), 7.21 – 7.14 (m, 3H), 7.10 (d, *J* = 8.8 Hz, 2H), 7.05 (d, *J* = 6.8 Hz, 2H), 4.65 (dd, *J* = 8.8, 4.4 Hz, 1H), 3.52 (dd, *J* = 17.6, 4.4 Hz, 1H), 3.20 (dd, *J* = 18.0, 9.2 Hz, 1H), 2.10 (s, 3H). <sup>13</sup>C NMR (101 MHz, CDCl<sub>3</sub>) δ 203.0, 138.0, 136.6, 132.2, 130.3, 129.7, 129.1, 128.7, 101.9, 66.0, 41.3, 30.5. HRMS (ESI/Q-TOF) *m/z*: [M+Na]<sup>+</sup> calcd for C<sub>24</sub>H<sub>23</sub>IO<sub>3</sub>SNa 541.0305; Found:541.0300.

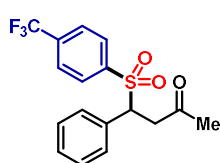

**4-phenyl-4-((4-(trifluoromethyl)phenyl)sulfonyl)butan-2-one (3e)** Prepared by general procedure; isolated as a pale yellow solid using petroleum/ethyl acetate (5:1) as eluent (51mg, 71%). <sup>1</sup>H NMR (400 MHz, Chloroform-*d*) δ 7.67 – 7.62 (m, 4H), 7.32 – 7.22 (m, 3H), 7.13 (d, *J* = 8.0 Hz, 2H), 4.79 (dd, *J* = 8.8, 4.4 Hz, 1H), 3.65 (dd, *J* = 17.6, 4.4 Hz, 1H), 3.31 (dd, *J* = 18.0, 9.2 Hz, 1H), 2.20 (s, 3H). <sup>19</sup>F NMR (376 MHz, CDCl<sub>3</sub>) δ -63.2. <sup>13</sup>C NMR (101 MHz, CDCl<sub>3</sub>) δ 202.9, 140.5, 135.3 (q, *J* = 33.3 Hz), 132.0, 129.7, 129.6, 129.2, 128.7, 125.8 (q, *J* = 4.0 Hz), 123.1 (q, *J* = 274.7 Hz), 66.2, 41.2, 30.5. HRMS (ESI/Q-TOF) *m/z*: [M+Na]<sup>+</sup> calcd for C<sub>17</sub>H<sub>15</sub>F<sub>3</sub>O<sub>3</sub>SNa 379.0586; Found:379.0588.

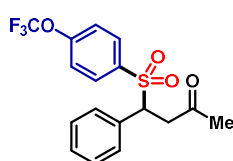

**4-phenyl-4-((4-(trifluoromethoxy)phenyl)sulfonyl)butan-2-one (3f)** Prepared by general procedure; isolated as a white solid using petroleum/ethyl acetate (5:1) as eluent (53 mg, 71%). <sup>1</sup>H NMR (400 MHz, Chloroform-*d*) δ 7.54 (d, *J* = 8.8 Hz, 2H), 7.29 – 7.27 (m, 1H), 7.25 – 7.19 (m, 4H), 7.12 (d, *J* = 7.2 Hz, 2H), 4.75 (dd, *J* = 8.8, 4.4 Hz, 1H), 3.63 (dd, *J* = 17.6, 4.4 Hz, 1H), 3.31 (dd, *J* = 17.6, 8.8 Hz, 1H), 2.20

(s, 3H).  $^{19}\text{F}$  NMR (376 MHz,  $\text{CDCl}_3$ )  $\delta$  -57.8.  $^{13}\text{C}$  NMR (101 MHz,  $\text{CDCl}_3$ )  $\delta$  203.0, 153.0 (q,  $J = 2$  Hz), 135.0, 132.2, 131.3, 129.7, 129.1, 128.7, 120.4, 120.1 (d,  $J = 261.6$  Hz), 66.4, 41.2, 30.5. HRMS (ESI/Q-TOF)  $m/z$ :  $[\text{M}+\text{Na}]^+$  calcd for  $\text{C}_{17}\text{H}_{15}\text{F}_3\text{O}_4\text{SNa}$  395.0535; Found: 395.0536.

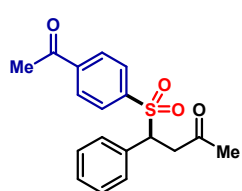

**4-((4-acetylphenyl)sulfonyl)-4-phenylbutan-2-one (3g)**

Prepared by general procedure; isolated as a pale yellow solid using petroleum/ethyl acetate (5:1) as eluent (55mg, 84%).  $^1\text{H}$  NMR (400 MHz, Chloroform- $d$ )  $\delta$  7.85 (d,  $J = 8.8$  Hz, 2H), 7.53 (d,  $J = 8.8$  Hz, 2H), 7.21 – 7.12 (m, 3H), 7.04 (d,  $J = 6.4$  Hz, 2H), 4.69 (dd,  $J = 8.8, 4.4$  Hz, 1H), 3.56 (dd,  $J = 18.0, 4.4$  Hz, 1H), 3.22 (dd,  $J = 18.0, 8.8$  Hz, 1H), 2.55 (s, 3H), 2.12 (s, 3H).  $^{13}\text{C}$  NMR (101 MHz,  $\text{CDCl}_3$ )  $\delta$  201.9, 195.7, 139.7, 131.0, 128.7, 128.4, 128.1, 127.4, 127.4, 65.1, 40.2, 29.5, 25.9, 0.0. HRMS (ESI/Q-TOF)  $m/z$ :  $[\text{M}+\text{H}]^+$  calcd for  $\text{C}_{18}\text{H}_{19}\text{O}_4\text{S}$  331.1004; Found: 331.0999.

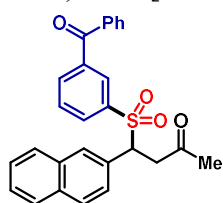

**4-((3-benzoylphenyl)sulfonyl)-4-(naphthalen-2-yl)butan-2-one (3h)**

Prepared by general procedure; isolated as a pale yellow solid using petroleum/ethyl acetate (5:1) as eluent (65mg, 73%).  $^1\text{H}$  NMR (400 MHz, Chloroform- $d$ )  $\delta$  7.81 (d,  $J = 4.6$  Hz, 1H), 7.77 – 7.71 (m, 2H), 7.69 – 7.60 (m, 8H), 7.53 – 7.44 (m, 4H), 7.32 (d,  $J = 8.4$  Hz, 1H), 5.00 (dd,  $J = 8.8, 4.4$  Hz, 1H), 3.75 (dd,  $J = 18.0, 4.4$  Hz, 1H), 3.47 (dd,  $J = 18.0, 9.2$  Hz, 1H), 2.21 (s, 3H).  $^{13}\text{C}$  NMR (101 MHz,  $\text{CDCl}_3$ )  $\delta$  203.0, 195.2, 142.1, 139.9, 136.3, 133.3, 133.2, 132.9, 130.1, 129.8, 129.7, 129.6, 129.0, 128.6, 128.5, 128.0, 127.7, 127.0, 126.6, 126.5, 66.5, 41.4, 30.5. HRMS (ESI/Q-TOF)  $m/z$ :  $[\text{M}+\text{H}]^+$  calcd for  $\text{C}_{27}\text{H}_{23}\text{O}_4\text{S}$  443.1312; Found: 443.1315.

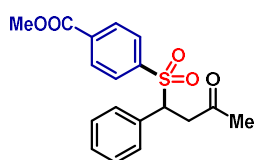

**methyl (S)-4-((3-oxo-1-phenylbutyl)sulfonyl)benzoate (3i)**

Prepared by general procedure; isolated as a pale yellow solid using petroleum/ethyl acetate (5:1) as eluent (60 mg, 87%).  $^1\text{H}$  NMR (400 MHz, Chloroform- $d$ )  $\delta$  7.94 (d,  $J = 8.4$  Hz, 2H), 7.49 (d,  $J = 8.4$  Hz, 2H), 7.19 – 7.11 (m, 3H), 7.03 (d,  $J = 7.2$  Hz, 2H), 4.69 (dd,  $J = 9.2, 4.4$  Hz, 1H), 3.86 (s, 3H), 3.55 (dd,  $J = 17.6, 4.4$  Hz, 1H), 3.22 (dd,  $J = 18.0, 8.8$  Hz, 1H), 2.10 (s, 3H).  $^{13}\text{C}$  NMR (101 MHz,  $\text{CDCl}_3$ )  $\delta$  203.0, 165.5, 140.8, 134.7, 132.0, 129.8, 129.7, 129.1, 128.7, 66.2, 52.7, 41.2, 30.5. HRMS (ESI/Q-TOF)  $m/z$ :  $[\text{M}+\text{Na}]^+$  calcd for  $\text{C}_{18}\text{H}_{18}\text{O}_5\text{SNa}$  369.0767; Found: 369.0762.

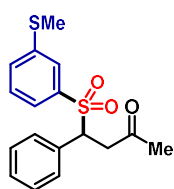

**4-((3-(methylthio)phenyl)sulfonyl)-4-phenylbutan-2-one (3j)**

Prepared by general procedure; isolated as a pale yellow solid using petroleum/ethyl acetate (5:1) as eluent (39 mg, 58%).  $^1\text{H}$  NMR (400 MHz, Chloroform- $d$ )  $\delta$  7.33-7.30 (m, 1H), 7.22 – 7.18 (m, 4H), 7.17 – 7.14 (m, 1H), 7.09 (s, 1H), 7.05 (d,  $J = 6.8$  Hz, 2H), 4.64 (dd,  $J = 9.2, 4.4$  Hz, 1H), 3.54 (dd,  $J = 17.6, 4.4$  Hz, 1H), 3.21 (dd,  $J = 18.0, 9.2$  Hz, 1H), 2.25 (s, 3H), 2.11 (s, 3H).  $^{13}\text{C}$  NMR (101 MHz,  $\text{CDCl}_3$ )  $\delta$  203.1, 140.7, 137.4, 132.5, 131.4, 129.8, 129.0, 128.9, 128.5, 125.6, 125.0, 66.3, 41.3, 30.5, 15.2. HRMS (ESI/Q-TOF)  $m/z$ :  $[\text{M}+\text{H}]^+$  calcd for  $\text{C}_{17}\text{H}_{19}\text{O}_3\text{S}_2$  335.0776; Found: 335.0770.

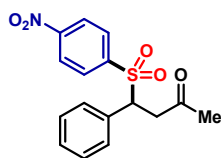

**N-(3,3-dimethyl-1-tosylbut-1-en-2-yl)acetamide (3k)** Prepared by general procedure; isolated as a pale yellow solid using petroleum/ethyl acetate (1:1) as eluent (41 mg, 62%). <sup>1</sup>H NMR (400 MHz, Chloroform-*d*) δ 8.12 (d, *J* = 8.8 Hz, 2H), 7.60 (d, *J* = 8.8 Hz, 2H), 7.22 – 7.14 (m, 3H), 7.04 (d, *J* = 7.2 Hz, 2H), 4.72 (dd, *J* = 8.8, 4.4 Hz, 1H), 3.58 (dd, *J* = 18.0, 4.0 Hz, 1H), 3.24 (dd, *J* = 18.0, 8.8 Hz, 1H), 2.13 (s, 3H). <sup>13</sup>C NMR (101 MHz, CDCl<sub>3</sub>) δ 202.7, 150.7, 142.7, 131.7, 130.4, 129.7, 129.4, 128.9, 123.8, 66.3, 41.0, 30.5. HRMS (ESI/Q-TOF) *m/z*: [M+H]<sup>+</sup> calcd for C<sub>16</sub>H<sub>16</sub>NO<sub>5</sub>S 334.0749; Found: 334.0748.

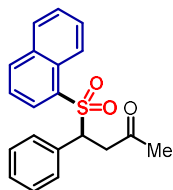

**4-(naphthalen-1-ylsulfonyl)-4-phenylbutan-2-one (3l)** Prepared by general procedure; isolated as a pale yellow solid using petroleum/ethyl acetate (5:1) as eluent (36 mg, 54%). <sup>1</sup>H NMR (400 MHz, Chloroform-*d*) δ 8.66 (d, *J* = 8.8 Hz, 1H), 7.95 (d, *J* = 8.8 Hz, 1H), 7.86 (d, *J* = 8.0 Hz, 1H), 7.71 (d, *J* = 7.6 Hz, 1H), 7.65 – 7.61 (m, 1H), 7.56 – 7.53 (m, 1H), 7.27 – 7.23 (m, 1H), 7.10 – 7.06 (m, 1H), 7.01 – 6.98 (m, 2H), 6.86 (d, *J* = 7.6 Hz, 2H), 5.00 (dd, *J* = 8.4, 4.8 Hz, 1H), 3.63 (dd, *J* = 18.0, 4.8 Hz, 1H), 3.26 (dd, *J* = 18.0, 8.4 Hz, 1H), 2.12 (s, 3H). <sup>13</sup>C NMR (101 MHz, CDCl<sub>3</sub>) δ 206.2, 138.1, 136.7, 135.3, 134.8, 134.7, 132.2, 132.1, 131.9, 131.7, 131.6, 131.2, 127.1, 126.7, 68.2, 44.1, 33.4. HRMS (ESI/Q-TOF) *m/z*: [M+Na]<sup>+</sup> calcd for C<sub>20</sub>H<sub>18</sub>O<sub>3</sub>SNa 361.0869; Found: 361.0865.

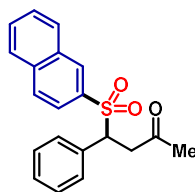

**4-(naphthalen-2-ylsulfonyl)-4-phenylbutan-2-one (3m)** Prepared by general procedure; isolated as a pale yellow solid using petroleum/ethyl acetate (5:1) as eluent (34 mg, 50%). <sup>1</sup>H NMR (400 MHz, Chloroform-*d*) δ 8.01 (s, 1H), 7.81 – 7.73 (m, 3H), 7.60 – 7.55 (m, 1H), 7.53 – 7.49 (m, 1H), 7.39 – 7.36 (m, 1H), 7.17 – 7.15 (m, 1H), 7.12 – 7.08 (m, 2H), 7.05 – 7.03 (m, 2H), 4.75 (dd, *J* = 9.2, 4.4 Hz, 1H), 3.58 (dd, *J* = 17.6, 4.4 Hz, 1H), 3.24 (dd, *J* = 17.6, 9.2 Hz, 1H), 2.10 (s, 3H). <sup>13</sup>C NMR (101 MHz, CDCl<sub>3</sub>) δ 203.2, 135.2, 133.8, 132.4, 131.9, 131.1, 129.8, 129.4, 129.3, 128.9, 128.8, 128.5, 127.9, 127.6, 123.5, 66.3, 41.6, 30.5. HRMS (ESI/Q-TOF) *m/z*: [M+Na]<sup>+</sup> calcd for C<sub>20</sub>H<sub>18</sub>O<sub>3</sub>SNa 361.0869; Found: 361.0870.

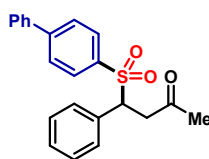

**4-([1,1'-biphenyl]-4-ylsulfonyl)-4-phenylbutan-2-one (3n)** Prepared by general procedure; isolated as a pale yellow solid using petroleum/ethyl acetate (5:1) as eluent (52 mg, 71%). <sup>1</sup>H NMR (400 MHz, Chloroform-*d*) δ 7.53 – 7.46 (m, 6H), 7.42 – 7.34 (m, 3H), 7.21 – 7.13 (m, 3H), 7.10 – 7.07 (m, 2H), 4.70 (dd, *J* = 9.2, 4.4 Hz, 1H), 3.56 (dd, *J* = 18.0, 4.4 Hz, 1H), 3.23 (dd, *J* = 18.0, 9.2 Hz, 1H), 2.11 (s, 3H). <sup>13</sup>C NMR (101 MHz, CDCl<sub>3</sub>) δ 202.2, 145.5, 138.0, 134.3, 131.4, 128.7, 128.5, 128.0, 127.9, 127.7, 127.5, 126.3, 126.2, 65.3, 40.5, 29.5. HRMS (ESI/Q-TOF) *m/z*: [M+Na]<sup>+</sup> calcd for C<sub>16</sub>H<sub>15</sub>IO<sub>3</sub>SNa 387.1025; Found: 387.1021.

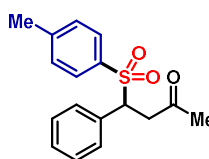

**4-phenyl-4-tosylbutan-2-one (3o)** Prepared by general procedure; isolated as a yellow solid using petroleum/ethyl acetate (5:1) as eluent (47 mg, 77%). <sup>1</sup>H NMR (400 MHz, Chloroform-*d*) δ 7.39 (d, *J* = 8.0 Hz, 2H), 7.28 – 7.23 (m, 3H), 7.18 (d, *J* = 8.0 Hz, 2H), 7.13 (d, *J* = 6.4 Hz, 2H), 4.72 (dd, *J* = 8.8, 4.4 Hz, 1H), 3.60 (dd, *J* = 17.6,

4.4 Hz, 1H), 3.28 (dd,  $J = 17.6, 8.8$  Hz, 1H), 2.39 (s, 3H), 2.17 (s, 3H).  $^{13}\text{C}$  NMR (101 MHz,  $\text{CDCl}_3$ )  $\delta$  203.3, 144.8, 133.9, 132.6, 129.7, 129.4, 129.0, 128.8, 128.5, 66.2, 41.6, 30.5, 21.6. HRMS (ESI/Q-TOF)  $m/z$ :  $[\text{M}+\text{Na}]^+$  calcd for  $\text{C}_{17}\text{H}_{18}\text{O}_3\text{SNa}$  325.0869; Found: 325.0867.

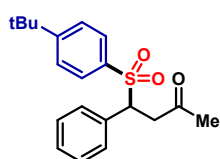

#### 4-((4-(tert-butyl)phenyl)sulfonyl)-4-phenylbutan-2-one (3p)

Prepared by general procedure; isolated as a pale yellow solid using petroleum/ethyl acetate (5:1) as eluent (59 mg, 86%).  $^1\text{H}$  NMR (400 MHz, Chloroform- $d$ )  $\delta$  7.36 – 7.29 (m, 4H), 7.19 – 7.10 (m, 3H), 7.04 (d,  $J = 6.8$  Hz, 2H), 4.64 (dd,  $J = 9.2, 4.4$  Hz, 1H), 3.49 (dd,  $J = 17.6, 4.4$  Hz, 1H), 3.20 (dd,  $J = 17.6, 9.2$  Hz, 1H), 2.08 (s, 3H), 1.22 (s, 9H).  $^{13}\text{C}$  NMR (101 MHz,  $\text{CDCl}_3$ )  $\delta$  203.3, 157.8, 133.8, 132.5, 129.7, 128.9, 128.8, 128.4, 125.7, 66.2, 41.6, 35.2, 31.0, 30.5. HRMS (ESI/Q-TOF)  $m/z$ :  $[\text{M}+\text{Na}]^+$  calcd for  $\text{C}_{20}\text{H}_{24}\text{O}_3\text{SNa}$  367.1338; Found: 367.1336.

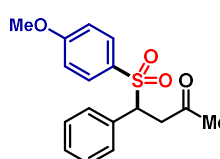

#### 4-((4-methoxyphenyl)sulfonyl)-4-phenylbutan-2-one (3q)

Prepared by general procedure; isolated as a yellow solid using petroleum/ethyl acetate (5:1) as eluent (38 mg, 60%).  $^1\text{H}$  NMR (400 MHz, Chloroform- $d$ )  $\delta$  7.33 (d,  $J = 8.8$  Hz, 2H), 7.20 – 7.13 (m, 3H), 7.05 (d,  $J = 7.2$  Hz, 2H), 6.75 (d,  $J = 8.8$  Hz, 2H), 4.62 (dd,  $J = 9.2, 4.4$  Hz, 1H), 3.76 (s, 3H), 3.52 (dd,  $J = 18.0, 4.4$  Hz, 1H), 3.19 (dd,  $J = 18.0, 9.2$  Hz, 1H), 2.09 (s, 3H).  $^{13}\text{C}$  NMR (101 MHz,  $\text{CDCl}_3$ )  $\delta$  203.4, 163.8, 132.7, 131.2, 129.7, 128.8, 128.5, 128.3, 113.9, 66.4, 55.6, 41.7, 30.5. HRMS (ESI/Q-TOF)  $m/z$ :  $[\text{M}+\text{Na}]^+$  calcd for  $\text{C}_{17}\text{H}_{19}\text{O}_4\text{S}$  319.0999; Found: 319.0996.

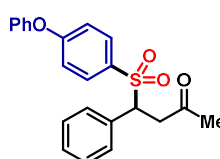

#### 4-((4-phenoxyphenyl)sulfonyl)-4-phenylbutan-2-one (3r)

Prepared by general procedure; isolated as a pale yellow solid using petroleum/ethyl acetate (5:1) as eluent (40 mg, 52%).  $^1\text{H}$  NMR (400 MHz, Chloroform- $d$ )  $\delta$  7.36 – 7.31 (m, 4H), 7.20 – 7.12 (m, 4H), 7.07 (d,  $J = 7.2$  Hz, 2H), 6.95 (d,  $J = 8.8$  Hz, 2H), 6.81 (d,  $J = 7.6$  Hz, 2H), 4.64 (dd,  $J = 8.8, 4.4$  Hz, 1H), 3.52 (dd,  $J = 18.0, 4.4$  Hz, 1H), 3.20 (dd,  $J = 18.0, 8.8$  Hz, 1H), 2.09 (s, 3H).  $^{13}\text{C}$  NMR (101 MHz,  $\text{CDCl}_3$ )  $\delta$  203.3, 162.5, 155.0, 132.6, 131.3, 130.3, 130.2, 129.7, 128.9, 128.5, 125.1, 120.2, 117.3, 66.4, 41.6, 30.5. HRMS (ESI/Q-TOF)  $m/z$ :  $[\text{M}+\text{Na}]^+$  calcd for  $\text{C}_{22}\text{H}_{20}\text{O}_4\text{SNa}$  403.0975; Found: 403.0974.

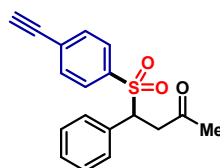

#### 4-((4-ethynylphenyl)sulfonyl)-4-phenylbutan-2-one (3s)

Prepared by general procedure; isolated as a pale yellow solid using petroleum/ethyl acetate (5:1) as eluent (27mg, 44%).  $^1\text{H}$  NMR (400 MHz, Chloroform- $d$ )  $\delta$  7.40 – 7.35 (m, 4H), 7.20 – 7.13 (m, 3H), 7.04 (d,  $J = 7.2$  Hz, 2H), 4.65 (dd,  $J = 9.2, 4.4$  Hz, 1H), 3.53 (dd,  $J = 18.0, 4.4$  Hz, 1H), 3.24 – 3.17 (m, 2H), 2.10 (s, 3H).  $^{13}\text{C}$  NMR (101 MHz,  $\text{CDCl}_3$ )  $\delta$  203.0, 136.8, 132.3, 132.2, 129.7, 129.1, 129.0, 128.6, 127.9, 81.8, 81.3, 66.2, 41.3, 30.5. HRMS (ESI/Q-TOF)  $m/z$ :  $[\text{M}+\text{H}]^+$  calcd for  $\text{C}_{18}\text{H}_{17}\text{O}_3\text{S}$  313.0898; Found: 313.0890.

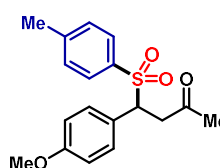

#### 4-(4-methoxyphenyl)-4-tosylbutan-2-one (3t)

Prepared by general procedure; isolated as a pale yellow solid using petroleum/ethyl acetate (5:1) as eluent (41mg, 62%).  $^1\text{H}$  NMR (400 MHz, Chloroform- $d$ )  $\delta$  7.32 (d,  $J = 8.0$  Hz, 2H), 7.11 (d,  $J = 8.0$  Hz,



2H), 6.97 (d,  $J = 8.8$  Hz, 2H), 6.68 (d,  $J = 8.8$  Hz, 2H), 4.58 (dd,  $J = 9.2, 4.0$  Hz, 1H), 3.70 (s, 3H), 3.47 (dd,  $J = 17.6, 4.0$  Hz, 1H), 3.14 (dd,  $J = 17.6, 9.2$  Hz, 1H), 2.32 (s, 3H), 2.08 (s, 3H).  $^{13}\text{C}$  NMR (101 MHz,  $\text{CDCl}_3$ )  $\delta$  203.5, 159.9, 144.7, 134.0, 130.9, 129.4, 129.1, 124.3, 113.9, 65.5, 55.3, 41.7, 30.5, 21.6. HRMS (ESI/Q-TOF)  $m/z$ :  $[\text{M}+\text{Na}]^+$  calcd for  $\text{C}_{18}\text{H}_{20}\text{O}_4\text{SNa}$  355.0975; Found: 355.0975.

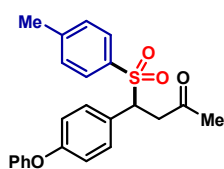

**(4-phenoxyphenyl)-4-tosylbutan-2-one (3u)** Prepared by general procedure; isolated as a pale yellow solid using petroleum/ethyl acetate (5:1) as eluent (62mg, 79%).  $^1\text{H}$  NMR (400 MHz, Chloroform- $d$ )  $\delta$  7.35 (d,  $J = 8.0$  Hz, 2H), 7.28 – 7.24 (m, 2H), 7.13 (d,  $J = 8.0$  Hz, 2H), 7.06 – 6.99 (m, 3H), 6.89 (d,  $J = 8.8$  Hz, 2H), 6.76 (d,  $J = 8.8$  Hz, 2H), 4.61 (dd,  $J = 9.2, 4.0$  Hz, 1H), 3.49 (dd,  $J = 17.6, 4.0$  Hz, 1H), 3.16 (dd,  $J = 17.6, 9.2$  Hz, 1H), 2.32 (s, 3H), 2.09 (s, 3H).  $^{13}\text{C}$  NMR (101 MHz,  $\text{CDCl}_3$ )  $\delta$  203.3, 157.9, 156.6, 144.9, 133.9, 131.1, 129.8, 129.4, 129.1, 127.0, 123.8, 119.2, 118.5, 65.5, 41.7, 30.5, 21.7. HRMS (ESI/Q-TOF)  $m/z$ :  $[\text{M}+\text{Na}]^+$  calcd for  $\text{C}_{23}\text{H}_{22}\text{O}_4\text{SNa}$  417.1131; Found: 417.1128.

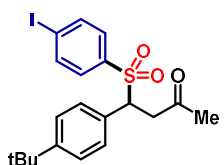

**4-(4-(tert-butyl)phenyl)-4-((4-iodophenyl)sulfonyl)butan-2-one (3v)** Prepared by general procedure; isolated as a pale yellow solid using petroleum/ethyl acetate (5:1) as eluent (68mg, 72%).  $^1\text{H}$  NMR (400 MHz, Chloroform- $d$ )  $\delta$  7.64 (d,  $J = 8.8$  Hz, 2H), 7.17 (d,  $J = 8.4$  Hz, 2H), 7.10 (d,  $J = 8.4$  Hz, 2H), 6.96 (d,  $J = 8.4$  Hz, 2H), 4.63 (dd,  $J = 9.2, 4.4$  Hz, 1H), 3.48 (dd,  $J = 17.6, 4.4$  Hz, 1H), 3.18 (dd,  $J = 17.6, 9.2$  Hz, 1H), 2.09 (s, 3H), 1.20 (s, 9H).  $^{13}\text{C}$  NMR (101 MHz,  $\text{CDCl}_3$ )  $\delta$  203.1, 152.4, 137.9, 136.7, 130.3, 129.3, 128.9, 125.6, 101.7, 65.9, 41.4, 34.6, 31.2, 30.5. HRMS (ESI/Q-TOF)  $m/z$ :  $[\text{M}+\text{Na}]^+$  calcd for  $\text{C}_{20}\text{H}_{24}\text{IO}_3\text{S}$  471.0485; Found: 471.0480.

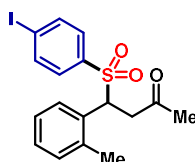

**4-((4-iodophenyl)sulfonyl)-4-(o-tolyl)butan-2-one (3w)** Prepared by general procedure; isolated as a yellow solid using petroleum/ethyl acetate (5:1) as eluent (68mg, 80%).  $^1\text{H}$  NMR (400 MHz, Chloroform- $d$ )  $\delta$  7.65 (d,  $J = 8.8$  Hz, 2H), 7.36 (d,  $J = 7.6$  Hz, 1H), 7.16 – 7.09 (m, 4H), 6.92 (d,  $J = 8.8$  Hz, 1H), 4.95 (dd,  $J = 9.2, 4.0$  Hz, 1H), 3.52 (dd,  $J = 18.0, 4.0$  Hz, 1H), 3.25 (dd,  $J = 18.0, 9.2$  Hz, 1H), 2.07 (s, 3H), 1.88 (s, 3H).  $^{13}\text{C}$  NMR (101 MHz,  $\text{CDCl}_3$ )  $\delta$  202.2, 137.6, 136.9, 136.0, 129.7, 129.5, 129.3, 127.9, 127.0, 125.4, 100.9, 60.1, 41.3, 29.4, 18.2. HRMS (ESI/Q-TOF)  $m/z$ :  $[\text{M}+\text{H}]^+$  calcd for  $\text{C}_{17}\text{H}_{18}\text{IO}_3\text{S}$  429.0021; Found: 429.0022.

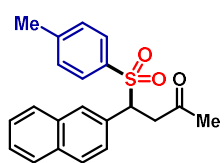

**4-(naphthalen-2-yl)-4-tosylbutan-2-one (3x)** Prepared by general procedure; isolated as a pale yellow solid using petroleum/ethyl acetate (5:1) as eluent (59mg, 84%).  $^1\text{H}$  NMR (400 MHz, Chloroform- $d$ )  $\delta$  7.80 (d,  $J = 7.2$  Hz, 1H), 7.73 (d,  $J = 8.4$  Hz, 1H), 7.61 (s, 1H), 7.52 – 7.45 (m, 2H), 7.41 (d,  $J = 8.0$  Hz, 2H), 7.27 (d,  $J = 7.6$  Hz, 2H), 7.13 (d,  $J = 8.0$  Hz, 2H), 4.91 (dd,  $J = 9.2, 4.0$  Hz, 1H), 3.69 (dd,  $J = 17.6, 4.0$  Hz, 1H), 3.40 (dd,  $J = 17.6, 9.2$  Hz, 1H), 2.36 (s, 3H), 2.17 (s, 3H).  $^{13}\text{C}$  NMR (101 MHz,  $\text{CDCl}_3$ )  $\delta$  203.3, 144.8, 133.9, 133.2, 132.9, 130.0, 129.4, 129.0, 128.3, 128.1, 127.6, 126.8, 126.7, 126.4, 66.3, 41.9, 30.5, 21.6. HRMS (ESI/Q-TOF)  $m/z$ :  $[\text{M}+\text{Na}]^+$  calcd for  $\text{C}_{21}\text{H}_{20}\text{O}_3\text{SNa}$  375.1025; Found: 375.1026.

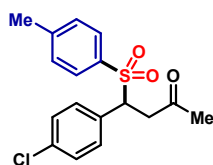

**4-(4-chlorophenyl)-4-tosylbutan-2-one (3y)** Prepared by general procedure; isolated as a white solid using petroleum/ethyl acetate (5:1) as eluent (47mg, 70%).  $^1\text{H}$  NMR (400 MHz, Chloroform-*d*)  $\delta$  7.42 (d,  $J = 6.8$  Hz, 2H), 7.23 – 7.20 (m, 4H), 7.08 (d,  $J = 7.2$  Hz, 2H), 4.69 (dd,  $J = 9.2, 4.4$  Hz, 1H), 3.59 (dd,  $J = 18.0, 4.4$  Hz, 1H), 3.23 (dd,  $J = 18.0, 9.2$  Hz, 1H), 2.41 (s, 3H), 2.17 (s, 3H).  $^{13}\text{C}$  NMR (101 MHz,  $\text{CDCl}_3$ )  $\delta$  203.1, 145.1, 134.9, 133.7, 131.2, 131.0, 129.6, 129.0, 128.7, 65.4, 41.6, 30.5, 21.7. HRMS (ESI/Q-TOF)  $m/z$ :  $[\text{M}+\text{Na}]^+$  calcd for  $\text{C}_{17}\text{H}_{17}\text{ClO}_3\text{SNa}$  359.0479; Found: 359.0479.

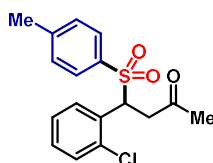

**4-(2-chlorophenyl)-4-tosylbutan-2-one (3z)** Prepared by general procedure; isolated as a pale yellow solid using petroleum/ethyl acetate (5:1) as eluent (41mg, 61%).  $^1\text{H}$  NMR (400 MHz, Chloroform-*d*)  $\delta$  7.59 (d,  $J = 8.4$  Hz, 1H), 7.42 (d,  $J = 8.4$  Hz, 2H), 7.31 – 7.28 (m, 1H), 7.25 – 7.18 (m, 4H), 5.45 (dd,  $J = 9.6, 4.4$  Hz, 1H), 3.66 (dd,  $J = 17.6, 4.4$  Hz, 1H), 3.31 (dd,  $J = 17.6, 9.6$  Hz, 1H), 2.41 (s, 3H), 2.17 (s, 3H).  $^{13}\text{C}$  NMR (101 MHz,  $\text{CDCl}_3$ )  $\delta$  203.3, 144.8, 133.9, 133.2, 130.0, 129.4, 129.0, 128.1, 127.6, 126.7, 126.4, 66.3, 41.9, 30.5, 21.6. HRMS (ESI/Q-TOF)  $m/z$ :  $[\text{M}+\text{Na}]^+$  calcd for  $\text{C}_{17}\text{H}_{17}\text{ClO}_3\text{SNa}$  359.0479; Found: 359.0476.

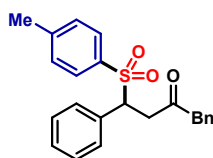

**1,4-diphenyl-4-tosylbutan-2-one (3aa)** Prepared by general procedure; isolated as a pale yellow solid using petroleum/ethyl acetate (5:1) as eluent (48 mg, 63%).  $^1\text{H}$  NMR (400 MHz, Chloroform-*d*)  $\delta$  7.27 (d,  $J = 8.0$  Hz, 2H), 7.21 – 7.18 (m, 3H), 7.15 (d,  $J = 7.6$  Hz, 1H), 7.10 – 7.06 (m, 4H), 6.99 (d,  $J = 8$  Hz, 2H), 6.92 (d,  $J = 7.6$  Hz, 2H), 4.61 (dd,  $J = 9.6, 4.4$  Hz, 1H), 3.62 – 3.56 (m, 2H), 3.47 (dd,  $J = 17.6, 4.4$  Hz, 1H), 3.23 (dd,  $J = 17.6, 9.6$  Hz, 1H), 2.30 (s, 3H).  $^{13}\text{C}$  NMR (101 MHz,  $\text{CDCl}_3$ )  $\delta$  203.2, 144.7, 133.9, 133.0, 132.3, 129.7, 129.5, 129.4, 129.0, 128.9, 128.7, 128.4, 127.3, 66.3, 50.6, 39.8, 21.6. HRMS (ESI/Q-TOF)  $m/z$ :  $[\text{M}+\text{Na}]^+$  calcd for  $\text{C}_{23}\text{H}_{22}\text{O}_3\text{SNa}$  401.1182; Found: 401.1184.

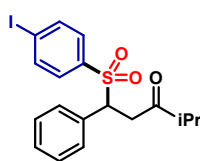

**1-((4-iodophenyl)sulfonyl)-4-methyl-1-phenylpentan-3-one (3ab)** Prepared by general procedure; isolated as a pale yellow solid using petroleum/ethyl acetate (5:1) as eluent (62 mg, 70%).  $^1\text{H}$  NMR (400 MHz, Chloroform-*d*)  $\delta$  7.66 (d,  $J = 8.4$  Hz, 2H), 7.21 – 7.10 (m, 5H), 7.05 (d,  $J = 7.2$  Hz, 2H), 4.66 (dd,  $J = 9.2, 4.0$  Hz, 1H), 3.51 (dd,  $J = 17.6, 4.0$  Hz, 1H), 3.27 (dd,  $J = 17.6, 9.2$  Hz, 1H), 2.56 – 2.49 (m, 1H), 1.02 (d,  $J = 7.2$  Hz, 3H), 0.93 (d,  $J = 7.2$  Hz, 3H).  $^{13}\text{C}$  NMR (101 MHz,  $\text{CDCl}_3$ )  $\delta$  209.1, 138.0, 136.7, 132.3, 130.3, 129.7, 129.0, 128.6, 101.8, 66.3, 41.4, 38.2, 17.9. HRMS (ESI/Q-TOF)  $m/z$ :  $[\text{M}+\text{H}]^+$  calcd for  $\text{C}_{18}\text{H}_{20}\text{IO}_3\text{S}$  443.0178; Found: 443.0171.

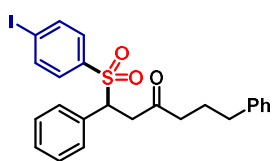

**1-((4-iodophenyl)sulfonyl)-1,6-diphenylhexan-3-one (3ac)** Prepared by general procedure; isolated as a pale yellow solid using petroleum/ethyl acetate (5:1) as eluent (72 mg, 70%).  $^1\text{H}$  NMR (400 MHz, Chloroform-*d*)  $\delta$  7.64 (d,  $J = 8.4$  Hz, 2H), 7.22 – 7.08 (m, 8H), 7.04 – 6.99 (m, 4H), 4.65 (dd,  $J = 8.8, 4.4$  Hz, 1H), 3.44 (dd,  $J = 17.6, 4.4$  Hz, 1H), 3.13 (dd,  $J = 17.6, 9.2$  Hz, 1H), 2.46 – 2.37 (m, 3H), 2.31 – 2.23 (m, 1H), 1.79 – 1.72 (m, 2H).  $^{13}\text{C}$  NMR (101 MHz,  $\text{CDCl}_3$ )  $\delta$  205.2,

141.2, 138.0, 136.6, 132.2, 130.3, 129.7, 129.1, 128.7, 128.5, 126.1, 101.9, 66.2, 42.5, 40.5, 34.8, 24.9. HRMS (ESI/Q-TOF)  $m/z$ :  $[M+Na]^+$  calcd for  $C_{24}H_{23}IO_3SNa$  541.0305; Found: 541.0300.

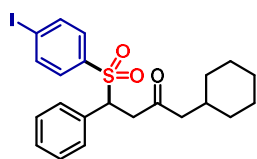

**1-cyclohexyl-4-((4-iodophenyl)sulfonyl)-4-phenylbutan-2-one (3ad)**

Prepared by general procedure; isolated as a white solid using petroleum/ethyl acetate (5:1) as eluent (84 mg, 85%).  $^1H$  NMR (400 MHz, Chloroform-*d*)  $\delta$  7.65 (d,  $J = 6.4$  Hz, 2H), 7.22 – 7.09 (m, 5H), 7.04 (d,  $J = 8.0$  Hz, 2H), 4.65 (dd,  $J = 8.8, 4.4$  Hz, 1H), 3.43 (dd,  $J = 17.6, 4.0$  Hz, 1H), 3.19 (dd,  $J = 17.6, 9.2$  Hz, 1H), 2.26 – 2.14 (m, 2H), 1.68 – 1.63 (m, 1H), 1.55 – 1.52 (m, 2H), 1.45 – 1.37 (m, 2H), 1.18 – 0.98 (m, 4H), 0.81 – 0.71 (m, 2H).  $^{13}C$  NMR (101 MHz,  $CDCl_3$ )  $\delta$  205.2, 138.0, 136.7, 132.2, 130.3, 129.7, 129.0, 128.6, 101.8, 66.2, 51.1, 40.9, 33.8, 33.1, 32.9, 26.1. HRMS (ESI/Q-TOF)  $m/z$ :  $[M+Na]^+$  calcd for  $C_{22}H_{25}IO_3SNa$  519.0461; Found: 519.0452.

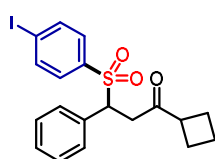

**1-cyclobutyl-3-((4-iodophenyl)sulfonyl)-3-phenylpropan-1-one (3ae)**

Prepared by general procedure; isolated as a pale yellow solid using petroleum/ethyl acetate (5:1) as eluent (64 mg, 71%).  $^1H$  NMR (400 MHz, Chloroform-*d*)  $\delta$  7.66 (d,  $J = 8.4$  Hz, 2H), 7.23 – 7.09 (m, 5H), 7.04 (d,  $J = 6.8$  Hz, 2H), 4.66 (dd,  $J = 9.2, 4.4$  Hz, 1H), 3.41 (dd,  $J = 17.6, 4.0$  Hz, 1H), 3.22 – 3.10 (m, 2H), 2.21 – 2.11 (m, 1H), 2.10 – 2.00 (m, 2H), 1.95 – 1.82 (m, 2H), 1.72 – 1.62 (m, 1H).  $^{13}C$  NMR (101 MHz,  $CDCl_3$ )  $\delta$  206.2, 138.0, 136.7, 132.3, 130.3, 129.7, 129.1, 128.6, 101.8, 66.2, 45.7, 37.8, 24.2, 23.9, 17.6. HRMS (ESI/Q-TOF)  $m/z$ :  $[M+H]^+$  calcd for  $C_{19}H_{20}IO_3S$  455.0178; Found: 455.0177.

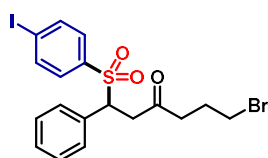

**6-bromo-1-((4-iodophenyl)sulfonyl)-1-phenylhexan-3-one (3af)**

Prepared by general procedure; isolated as a pale yellow solid using petroleum/ethyl acetate (5:1) as eluent (56 mg, 54%).  $^1H$  NMR (400 MHz, Chloroform-*d*)  $\delta$  7.67 (d,  $J = 8.4$  Hz, 2H), 7.23 – 7.15 (m, 3H), 7.12 – 7.03 (m, 4H), 4.66 (dd,  $J = 8.8, 4.8$  Hz, 1H), 3.52 (dd,  $J = 17.6, 4.8$  Hz, 1H), 3.29 – 3.14 (m, 2H), 3.18 (dd,  $J = 17.6, 8.4$  Hz, 1H), 2.71 – 2.62 (m, 1H), 2.54 – 2.46 (m, 1H), 2.03 – 1.95 (m, 2H).  $^{13}C$  NMR (101 MHz,  $CDCl_3$ )  $\delta$  204.2, 138.1, 136.5, 132.1, 130.3, 129.7, 129.2, 128.7, 102.0, 66.2, 41.3, 40.7, 32.8, 26.1. HRMS (ESI/Q-TOF)  $m/z$ :  $[M+H]^+$  calcd for  $C_{18}H_{19}BrIO_3S$  520.9283; Found: 520.9278.

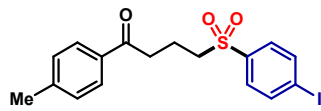

**4-((4-iodophenyl)sulfonyl)-1-(p-tolyl)butan-1-one (3ag)**

Prepared by general procedure; isolated as a white solid using petroleum/ethyl acetate (5:1) as eluent (26 mg, 30%).  $^1H$  NMR (400 MHz, Chloroform-*d*)  $\delta$  7.86 (d,  $J = 8.4$  Hz, 2H), 7.73 (d,  $J = 8.4$  Hz, 2H), 7.55 (d,  $J = 8.4$  Hz, 2H), 7.18 (d,  $J = 8.8$  Hz, 2H), 3.16 (t,  $J = 7.2$  Hz, 2H), 3.07 (t,  $J = 6.8$  Hz, 2H), 2.34 (s, 3H), 2.11 – 2.04 (m, 2H).  $^{13}C$  NMR (101 MHz,  $CDCl_3$ )  $\delta$  197.9, 144.4, 138.7, 138.6, 133.9, 129.5, 129.4, 128.1, 101.7, 55.2, 36.0, 21.7, 17.4. HRMS (ESI/Q-TOF)  $m/z$ :  $[M+H]^+$  calcd for  $C_{17}H_{18}IO_3S$  429.0021; Found: 429.0025.

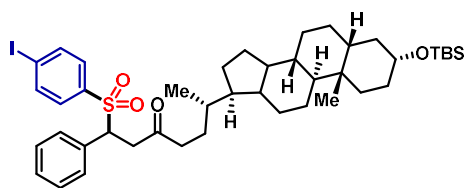

**(6S)-6-((3R,5R,8S,9S,10S,17R)-3-((tert-butyl dimethylsilyloxy)-10-methylhexadecahydro-1H-cyclopenta[a]phenanthren-17-yl)-1-((4-iodophenyl)sulfonyl)-1-phenylheptan-3-one (3ah)**

Prepared by general procedure; isolated as a yellow solid using petroleum/ethyl acetate (5:1) as eluent (88 mg, 53%). <sup>1</sup>H NMR (400 MHz, Chloroform-*d*) δ 7.66 (d, *J* = 8.0 Hz, 2H), 7.25 – 7.20 (m, 1H), 7.19 – 7.09 (m, 4H), 7.06 – 7.03 (m, 2H), 4.65 (dd, *J* = 9.2, 4.0 Hz, 1H), 4.08 – 4.02 (m, 1H), 3.57 – 3.44 (m, 2H), 3.24 – 3.14 (m, 1H), 2.45 – 2.15 (m, 2H), 2.00 - 1.90 (s, 2H), 1.87 – 1.41 (m, 13H), 1.35 – 0.74 (m, 29H), 0.52 (s, 3H). <sup>13</sup>C NMR (101 MHz, CDCl<sub>3</sub>) δ 205.9, 171.2, 138.0, 136.7, 132.2, 130.3, 129.7, 129.1, 128.7, 101.8, 71.9, 66.2, 60.4, 56.5, 55.9, 42.7, 42.1, 40.5, 40.4, 40.3, 40.2, 36.5, 35.8, 35.4, 35.2, 35.1, 34.6, 30.6, 29.5, 28.2, 27.2, 26.4, 24.2, 23.4, 21.1, 20.8, 18.3, 14.2, 12.0. HRMS (ESI/Q-TOF) *m/z*: [M+Na]<sup>+</sup> calcd for C<sub>43</sub>H<sub>63</sub>IO<sub>4</sub>SSiNa 853.3159; Found: 853.3155.

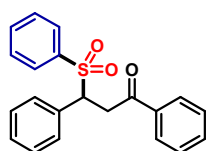

**1,3-diphenyl-3-(phenylsulfonyl)propan-1-one (3ai)** Prepared by general procedure; isolated as a white solid using petroleum/ethyl acetate (5:1) as eluent (22 mg, 32%). <sup>1</sup>H NMR (400 MHz, Chloroform-*d*) δ 7.98 – 7.84 (m, 2H), 7.64 – 7.50 (m, 4H), 7.49 – 7.41 (m, 2H), 7.41 – 7.32 (m, 2H), 7.23 – 7.14 (m, 5H), 4.92 (dd, *J* = 9.7, 3.6 Hz, 1H), 4.18 – 4.11 (m, 1H), 3.94 (dd, *J* = 17.9, 9.7 Hz, 1H). <sup>13</sup>C NMR (101 MHz, CDCl<sub>3</sub>) δ 195.0, 137.0, 136.2, 133.8, 133.8, 132.6, 129.9, 129.1, 128.9, 128.9, 128.8, 128.6, 128.2, 66.6, 37.0. HRMS (ESI/Q-TOF) *m/z*: [M+Na]<sup>+</sup> calcd for C<sub>21</sub>H<sub>18</sub>O<sub>3</sub>SNa 373.0869; Found: 373.0865.

## Gram-Scale Reaction and Transformation of $\gamma$ -keto aryl sulfones.

### Gram-Scale Reaction

**Chamber A:** for SO<sub>2</sub> gas generation

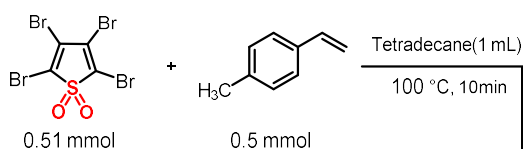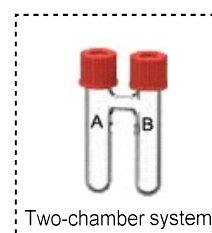

**Chamber B:** for the synthesis of  $\gamma$ -ketosulfone compounds

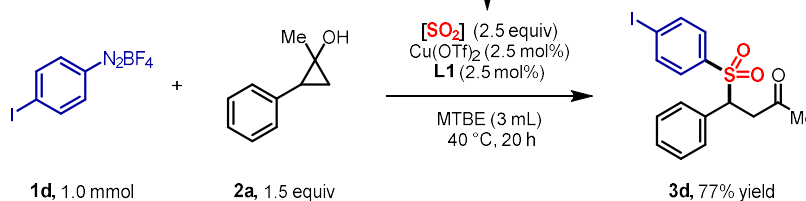

In an argon fulfilled glovebox, tetrabromothiophene S, S-dioxides (2.55 mmol, 1187 mg) and 1-methyl-4-vinylbenzene (2.5 mmol, 330  $\mu$ L) were added into chamber A with a magnetic stirring bar, followed by addition of tetradecane (3.0 mL). Diazonium salts **1** (1.0 mmol), Cyclopropanols **2** (1.5 mmol, 1.5 equiv.), Cu(OTf)<sub>2</sub> (2.5 mol%, 9.0 mg)

and **L1** (8.0 mg, 2.5 mol%) were added into chamber B with a magnetic stirring bar, followed by addition of MTBE (3.0 mL). The two-chamber was sealed and removed out of the glovebox, then chamber A was allowed to heated to 100 °C in heat block. About ten minutes later, the sulfur dioxide was completely released since the system in chamber A became clear. Then chamber B was heated to 40 °C in heat block. Upon completion, the mixture in chamber B was passed through a short silica gel pad with ethyl acetate. The filtrate was washed by ethyl acetate and H<sub>2</sub>O (15 mL×3), dried by Na<sub>2</sub>SO<sub>4</sub>, then concentrated and the residue was purified by flash column chromatography to afford pure products **3d** in 77% yield.

#### Transformation of $\gamma$ -keto arylsulfone

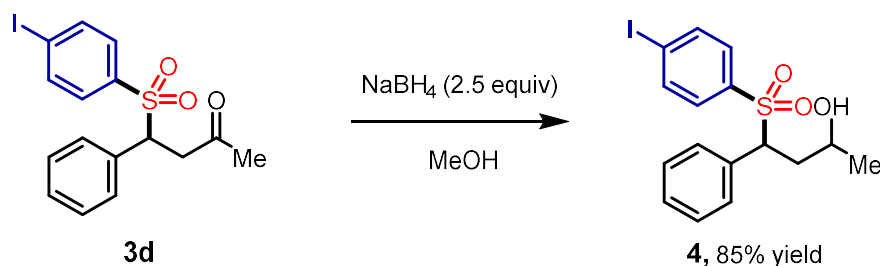

According to the literature<sup>5</sup>, to a mixture of **3d** (82.9 mg, 0.2 mmol) in MeOH (3 mL) was added NaBH<sub>4</sub> (18.9 mg, 0.5 mmol) at 0 °C. After stirring for 24 hours, the mixture was washed by ethyl acetate and H<sub>2</sub>O (15 mL×3), dried by Na<sub>2</sub>SO<sub>4</sub>, then concentrated and the residue was purified by flash column chromatography to afford pure products **4** (70.7 mg, 85% yield). <sup>1</sup>H NMR (400 MHz, Chloroform-d) 7.69 – 7.57 (m, 2H), 7.28 – 7.11 (m, 4H), 7.11 – 6.98 (m, 3H), 4.36 (dd, J = 11.6, 3.5Hz, 1H), 3.49-3.38 (m, 1H), 2.61 – 2.55 (m, 1H), 2.18 – 2.08 (m, 1H), 1.57 (br, 1H), 1.12 (d, J = 6.1 Hz, 3H). <sup>13</sup>C NMR (101 MHz, CDCl<sub>3</sub>)  $\delta$  137.9, 136.9, 133.2, 130.3, 129.7, 129.0, 128.7, 101.6, 68.4, 65.7, 37.8, 23.3. HRMS (ESI/Q-TOF) m/z: [M+Na]<sup>+</sup> calcd for C<sub>16</sub>H<sub>17</sub>IO<sub>3</sub>SNa 438.9835; Found: 438.9837.

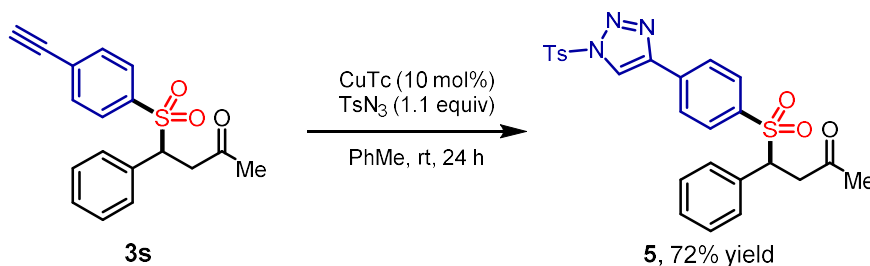

According to the literature<sup>6</sup>, copper(I) thiophene-2-carboxylate hydrate (CuTc) (1.9 mg, 0.01 mmol, 10 mol%) and **3s** (37.0 mg, 0.1 mmol, 1.0 equiv) were added to PhMe (1.0 mL) in a 15 mL vial. Then TsN<sub>3</sub> (21.7 mg, 0.11 mmol, 1.1 equiv) were slowly injected into the flask. The reaction was stirred at room temperature for one day. After terminal alkynes were completely reacted (monitored by TLC analysis). The reaction mixture was filtered to remove inorganic compound, the solvent was dried over and purified by flash column chromatography to get N1-sulfonyl-1,2,3-triazoles **5**. Isolated as a white solid using petroleum/ethyl acetate (5/1) as eluent (73.4 mg, 72% yield). <sup>1</sup>H NMR (400 MHz, Chloroform-*d*) δ 8.33 (s, 1H), 7.97 (d, *J* = 8.5 Hz, 2H), 7.77 (d, *J* = 8.5 Hz, 2H), 7.47 (d, *J* = 8.5 Hz, 2H), 7.34 (d, *J* = 8.2 Hz, 2H), 7.17 – 7.10 (m, 3H), 7.11 – 6.99 (m, 2H), 4.68 (dd, *J* = 9.0, 4.3 Hz, 1H), 3.56 (dd, *J* = 17.8, 4.3 Hz, 1H), 3.22 (dd, *J* = 17.8, 9.0 Hz, 1H), 2.39 (s, 3H), 2.11 (s, 3H). <sup>13</sup>C NMR (101 MHz, CDCl<sub>3</sub>) δ 202.1, 146.8, 144.3, 136.0, 133.1, 131.7, 131.2, 129.6, 128.8, 128.7, 128.0, 127.9, 127.6, 125.0, 119.3, 65.2, 40.4, 29.5, 28.7. HRMS (ESI/Q-TOF) *m/z*: [M+H]<sup>+</sup> calcd for C<sub>25</sub>H<sub>24</sub>N<sub>3</sub>O<sub>5</sub>S<sub>2</sub> 510.1152; Found: 510.1155.

## Mechanistic studies

### (a) Radical trapping experiment with TEMPO

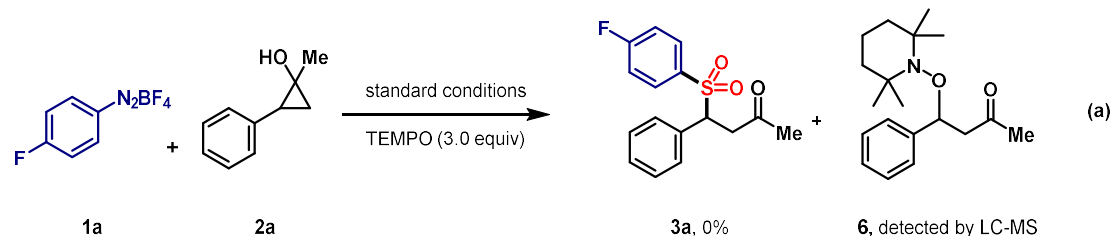

In an argon fulfilled glovebox, tetrabromothiophene S, S-dioxides (0.51 mmol, 237.4 mg) and 1-methyl-4-vinylbenzene (0.5 mmol, 66 uL) were added into chamber A with a magnetic stirring bar, followed by addition of tetradecane (1.0 mL). Diazonium salt

**1a** (0.2 mmol, 1.0 equiv), Cyclopropanol **2a** (0.3 mmol, 1.5 equiv), Cu(OTf)<sub>2</sub> (2.5 mol%, 1.8 mg), **L1** (2.5 mol%, 1.6 mg) and TEMPO (0.6 mmol, 3.0 equiv.) were added into chamber B with a magnetic stirring bar, followed by addition of MTBE (1.0 mL). The two-chamber was sealed and removed out of the glovebox, then chamber A was allowed to heated to 100 °C in heat block. About ten minutes later, the sulfur dioxide was completely released since the system in chamber A became clear. Then chamber B was heated to 40 °C in heat block. The yields were determined by <sup>19</sup>F-NMR analysis using trifluorotoluene as an internal standard. The benzyl radical combined with TEMPO were detected by LCMS m/z: [M+H]<sup>+</sup> calcd for C<sub>19</sub>H<sub>30</sub>NO<sub>2</sub> 304.2271; found: 304.3362.

**(b) Radical trapping experiment with 1,1-Diphenylethylene**

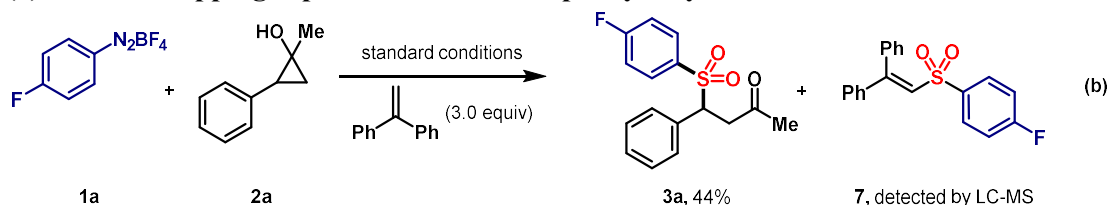

In an argon fulfilled glovebox, tetrabromothiophene S, S-dioxides (0.51 mmol, 237.4 mg) and 1-methyl-4-vinylbenzene (0.5 mmol, 66 uL) were added into chamber A with a magnetic stirring bar, followed by addition of tetradecane (1.0 mL). Diazonium salt **1a** (0.2 mmol, 1.0 equiv), Cyclopropanol **2a** (0.3 mmol, 1.5 equiv), Cu(OTf)<sub>2</sub> (2.5 mol%, 1.8 mg), **L1** (2.5 mol%, 1.6 mg) and 1,1-Diphenylethylene (0.6 mmol, 3.0 equiv) were added into chamber B with a magnetic stirring bar, followed by addition of MTBE (1.0 mL). The two-chamber was sealed and removed out of the glovebox, then chamber A was allowed to heated to 100 °C in heat block. About ten minutes later, the sulfur dioxide was completely released since the system in chamber A became clear. Then chamber B was heated to 40 °C in heat block. The yields were determined by <sup>19</sup>F-NMR analysis using trifluorotoluene as an internal standard. The aryl radical combined with 1,1-Diphenylethylene were detected by LCMS m/z: [M+Na]<sup>+</sup> calcd for C<sub>20</sub>H<sub>15</sub>FO<sub>2</sub>SNa 361.0669; found: 361.2886.

**(c) homo-coupling products 8**



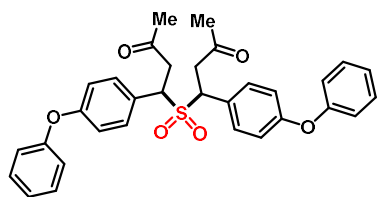

**4-((3-oxo-1-(4-phenoxyphenyl)butyl)sulfonyl)-4-(4-phenoxyphenyl)butan-2-one (8a)** Isolated as a side product of the corresponding  $\gamma$ -ketone aryl sulfone.  $^1\text{H}$  NMR (400 MHz, Chloroform-*d*)  $\delta$  7.34 – 7.27 (m, 2H), 7.19 (m, 2H), 7.09 (m, 1H), 7.00 (d,  $J = 7.5$  Hz, 2H), 6.89 (d,  $J = 8.7$  Hz, 2H), 4.37 (dd,  $J = 9.7, 3.6$  Hz, 1H), 3.33 (dd,  $J = 17.8, 3.6$  Hz, 1H), 2.98 (dd,  $J = 17.8, 9.7$  Hz, 1H), 2.00 (s, 3H).  $^{13}\text{C}$  NMR (101 MHz,  $\text{CDCl}_3$ )  $\delta$  203.1, 158.6, 156.0, 131.4, 130.0, 126.5, 124.2, 119.9, 118.2, 59.8, 42.0, 30.5. HRMS (ESI/Q-TOF)  $m/z$ :  $[\text{M}+\text{H}]^+$  calcd for  $\text{C}_{32}\text{H}_{31}\text{O}_6\text{S}$  543.1836; Found: 543.1840.

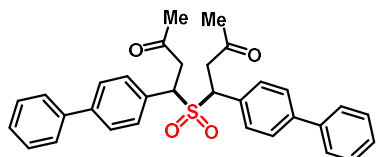

**4-([1,1'-biphenyl]-4-yl)-4-((1-([1,1'-biphenyl]-4-yl)-3-oxobutyl)sulfonyl)butan-2-one (8b)** Isolated as a side product of the corresponding  $\gamma$ -ketone aryl sulfone.  $^1\text{H}$  NMR (400 MHz, Chloroform-*d*)  $\delta$  7.63 – 7.54 (m, 4H), 7.49 – 7.39 (m, 4H), 7.37 – 7.30 (m, 1H), 5.20 (dd,  $J = 8.9, 3.5$  Hz, 2H), 2.99 – 2.77 (m, 2H), 2.21 (s, 3H).  $^{13}\text{C}$  NMR (101 MHz, Chloroform-*d*)  $\delta$  209.3, 141.8, 140.9, 140.8, 128.9, 127.4, 127.2, 126.2, 69.7, 52.0, 30.91. HRMS (ESI/Q-TOF)  $m/z$ :  $[\text{M}+\text{H}]^+$  calcd for  $\text{C}_{32}\text{H}_{31}\text{O}_4\text{S}$  511.1938; Found: 511.1939.

## References

1. Tao Zhong, Meng-Ke Pang, Zhi-Da Chen, Bin Zhang, Jiang Weng, and Gui Lu *Org. Lett.* **2020**, *22*, 3072-3078.
2. Epstein, O. L.; Savchenko, A. I.; Kulinkovich, O. G., Titanium(IV) isopropoxide-catalysed reaction of alkylmagnesium halides with ethyl acetate in the presence of styrene. Non-hydride mechanism of ligand exchange in the titanacyclopropanes. *Tetrahedron Lett.* **1999**, *40*, 5935-5938.
3. Wu, S.; Li, J.; He, R.; Jia, K.; Chen, Y., Terminal Trifluoromethylation of Ketones via Selective C–C Cleavage of Cycloalkanols Enabled by Hypervalent Iodine Reagents. *Org. Lett.* **2021**, *23*, 9204-9209.
4. Kulinkovich, O. G.; Vasilevskii, D. A.; Savchenko, A. I.; Sviridov, S. V. *Journal of Organic Chemistry USSR (English Translation)*, **1991**, *27*, 1249 - 1251.
5. Zhang, C.; Zhang, C.; Tang, J.; Ye, S.; Ma, M.; Wu, J., Synthesis of  $\gamma$ -Keto Sulfones through a Three-Component Reaction of Cyclopropanols, DABCO·(SO<sub>2</sub>)<sub>2</sub> and Alkyl Halides. *Adv. Synth. Catal.* **2021**, *363*, 3109-3114.
6. Wang, T.; Tang, Z.; Luo, H.; Tian, Y.; Xu, M.; Lu, Q.; Li, B. Access to (Z)- $\beta$ -Substituted Enamides from N1-H-1,2,3-Triazoles. *Org. Lett.*, **2021**, *23*, 6293-6298.



# Copies of $^1\text{H}$ NMR, $^{19}\text{F}$ NMR and $^{13}\text{C}$ NMR spectra of Products

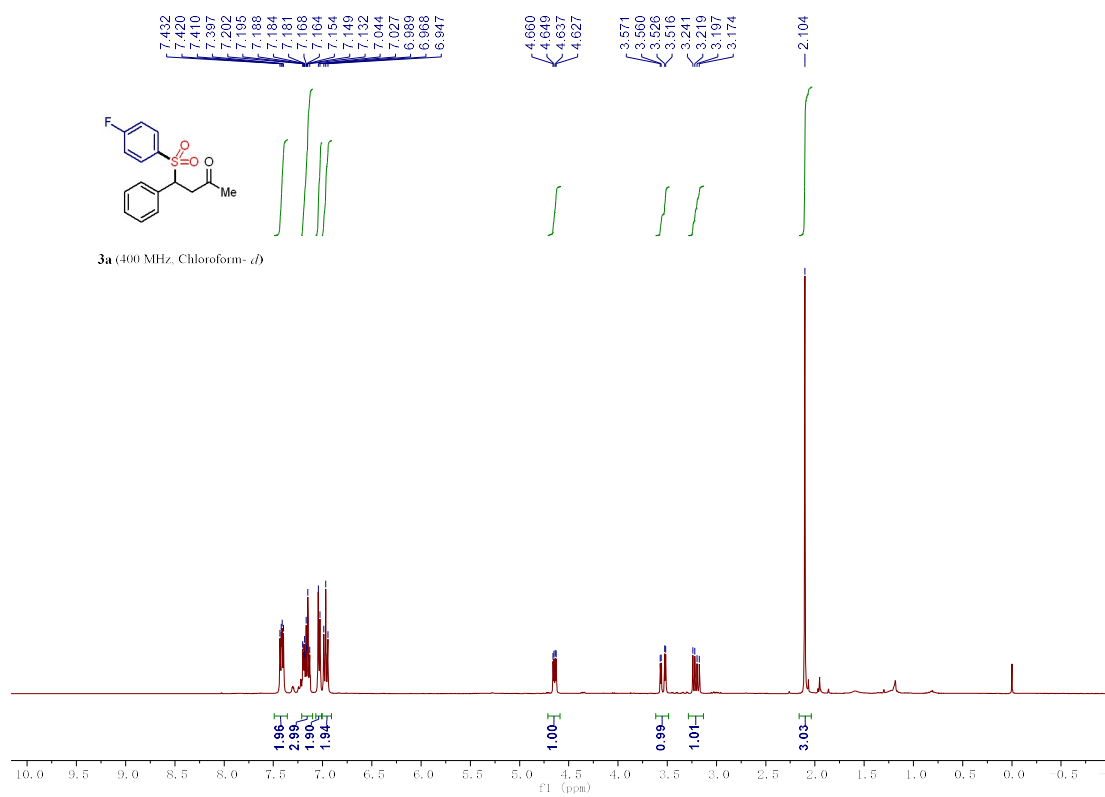

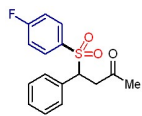

3a (376 MHz, Chloroform-*d*)

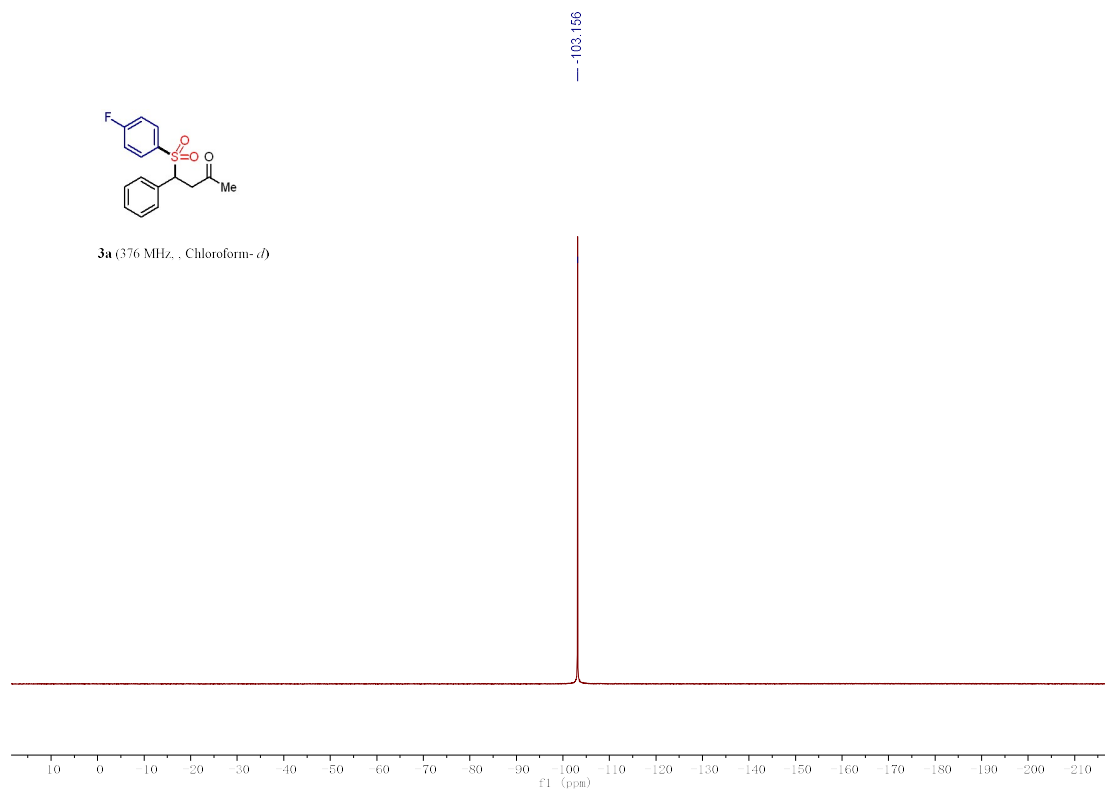

203.10  
 167.09  
 164.54  
 132.85  
 132.82  
 132.36  
 131.89  
 131.80  
 129.66  
 129.04  
 128.62  
 116.18  
 115.95  
 77.39  
 77.07  
 76.75  
 66.34  
 41.34  
 30.49

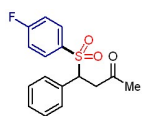

3a (101 MHz, Chloroform-*d*)

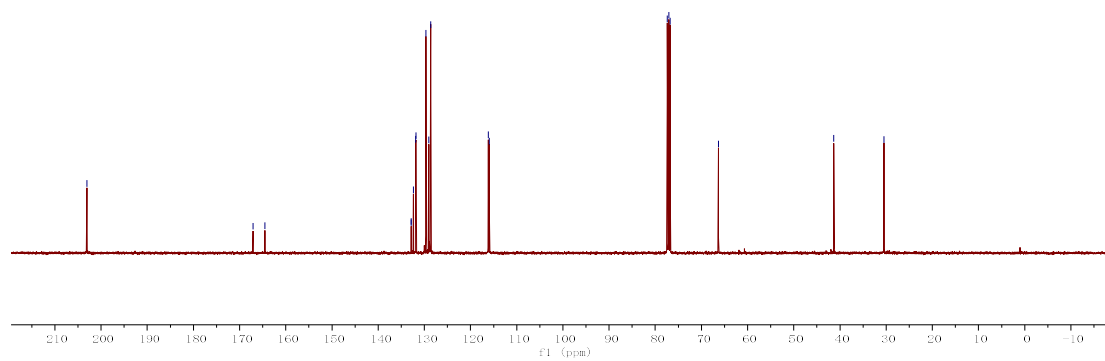

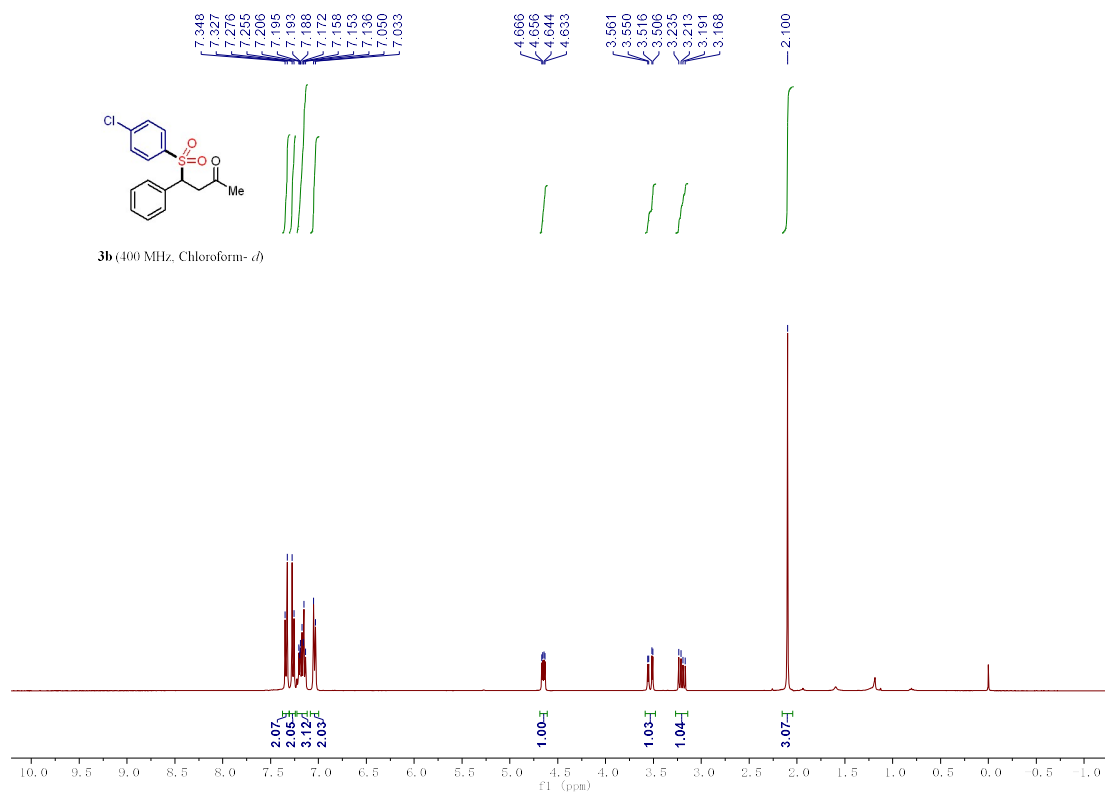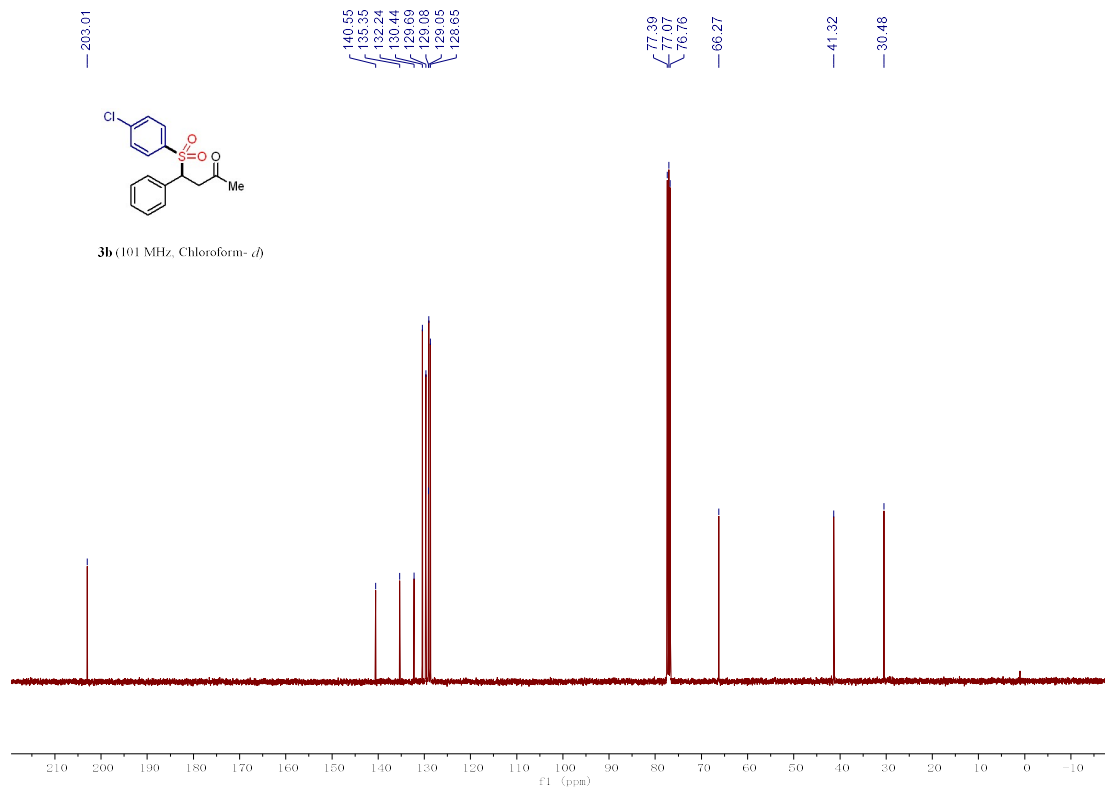

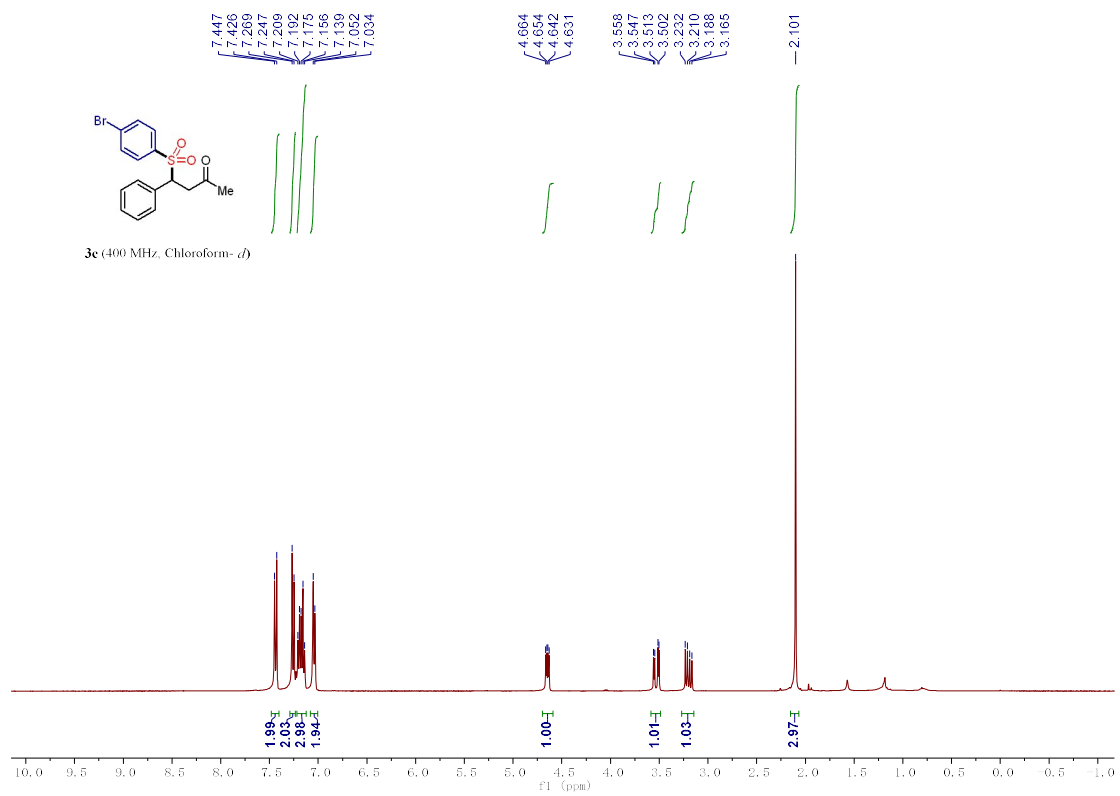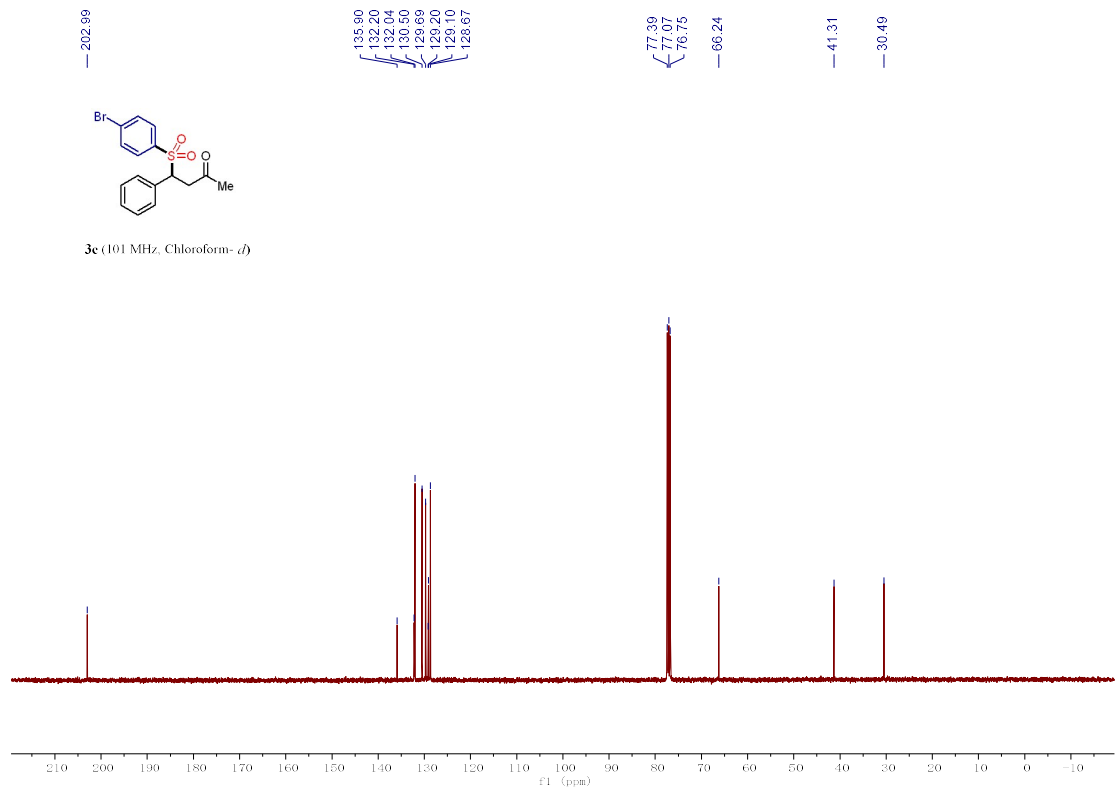

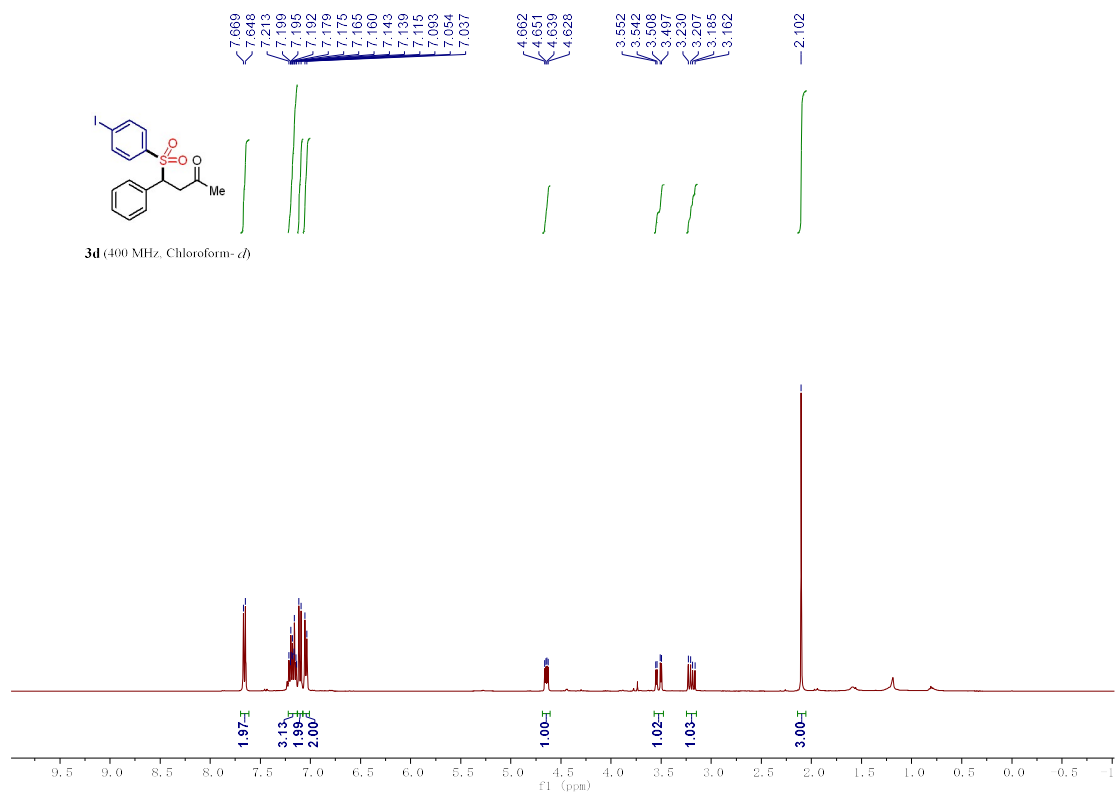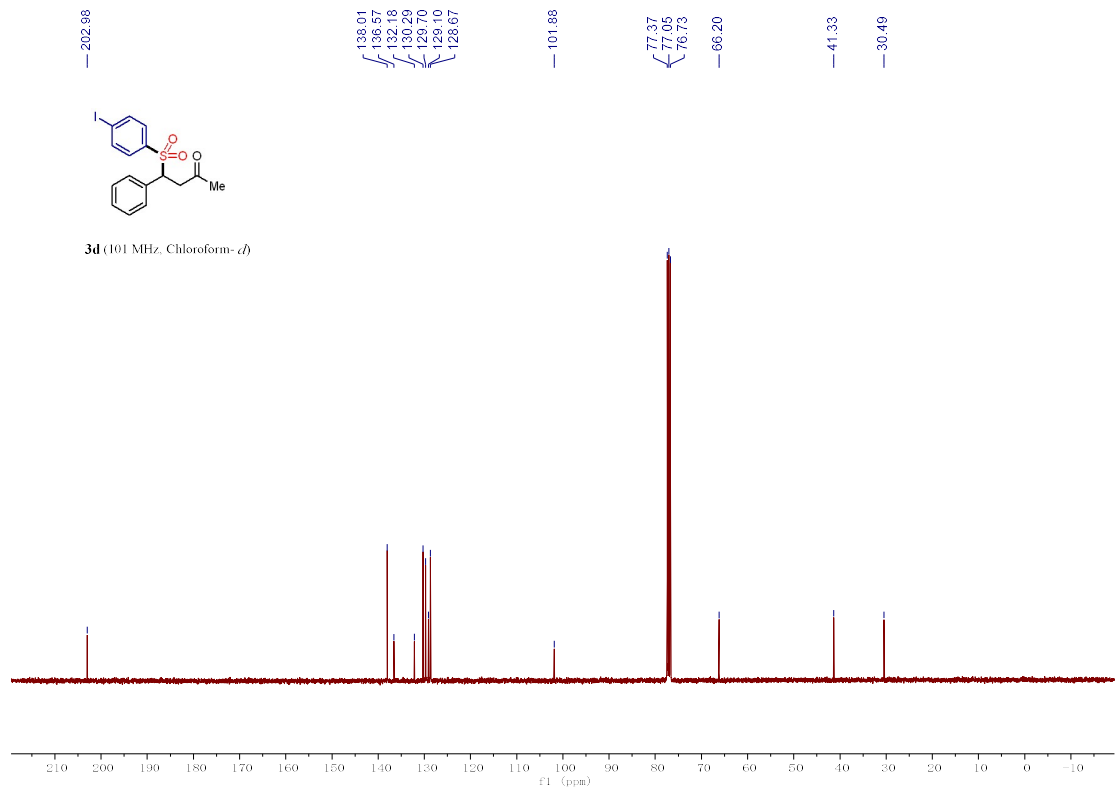

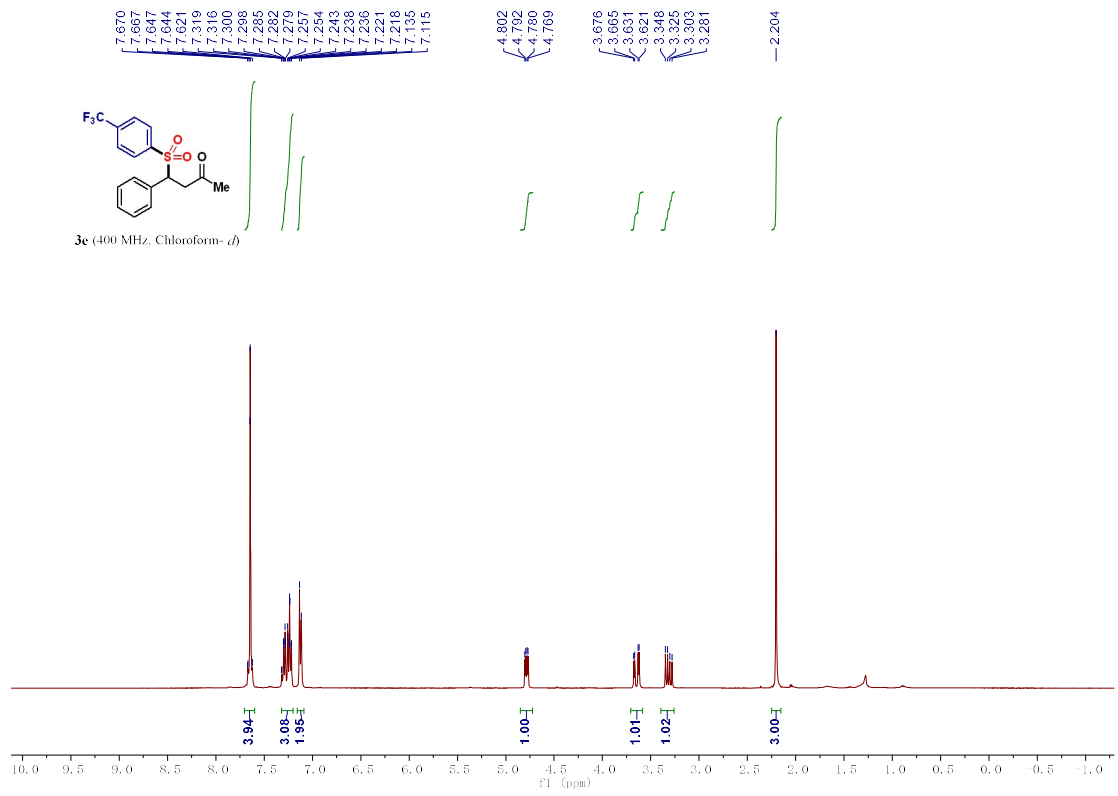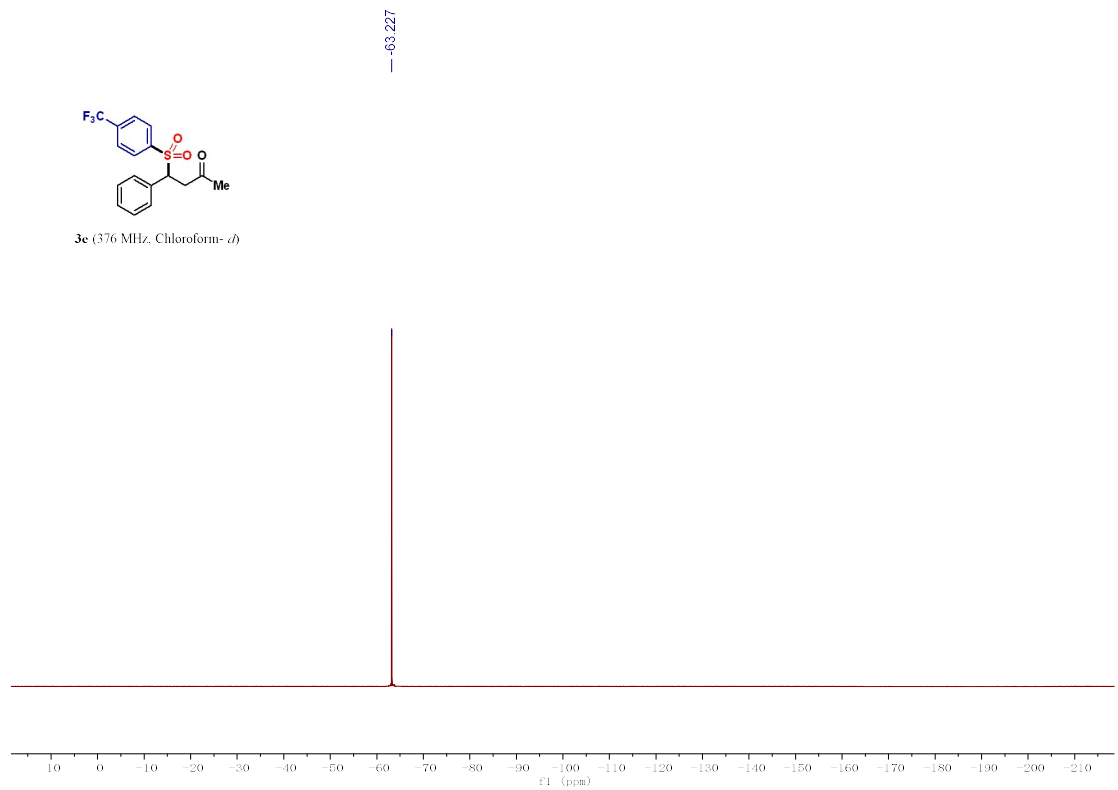

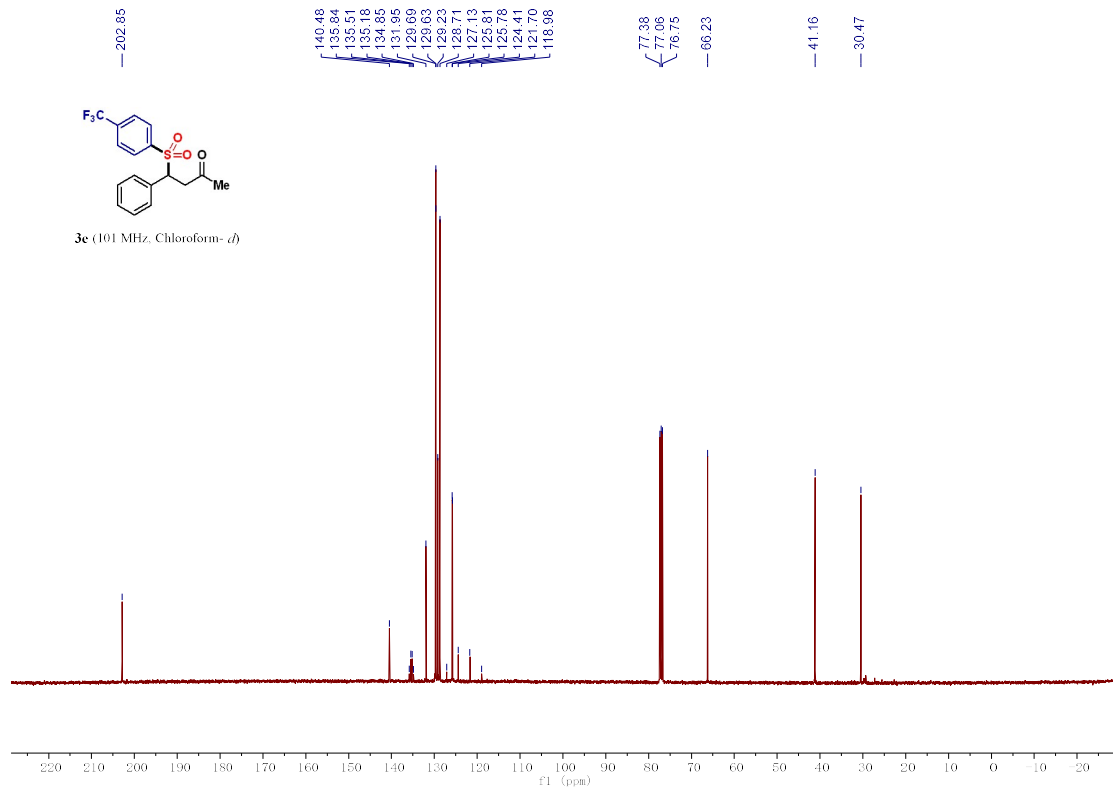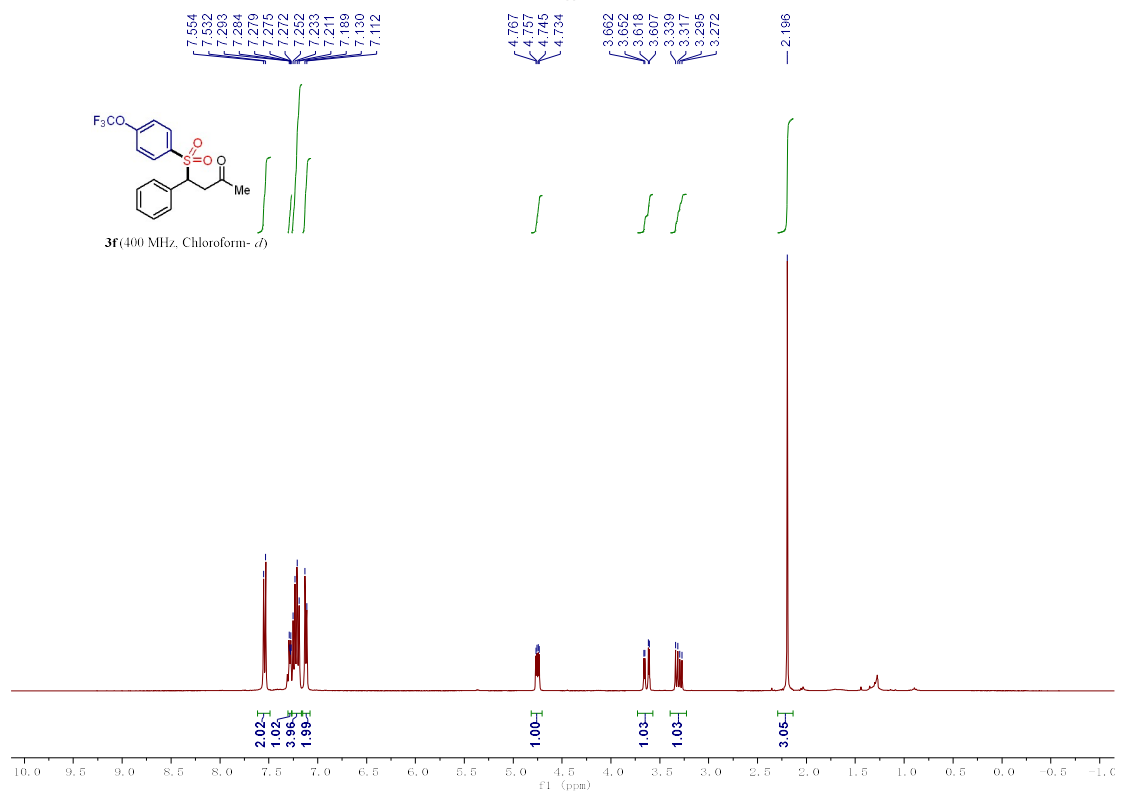

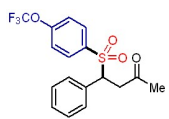

**3f** (376 MHz, Chloroform-*d*)

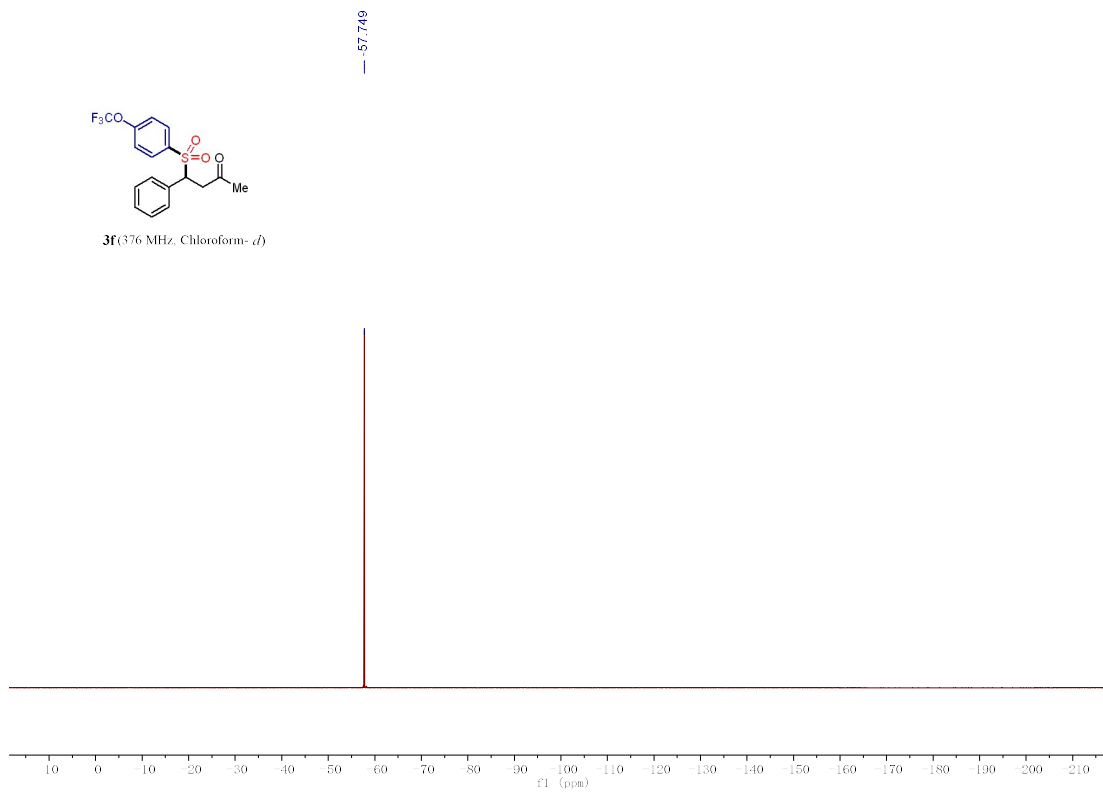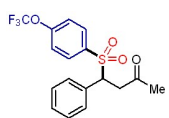

**3f** (101 MHz, Chloroform-*d*)

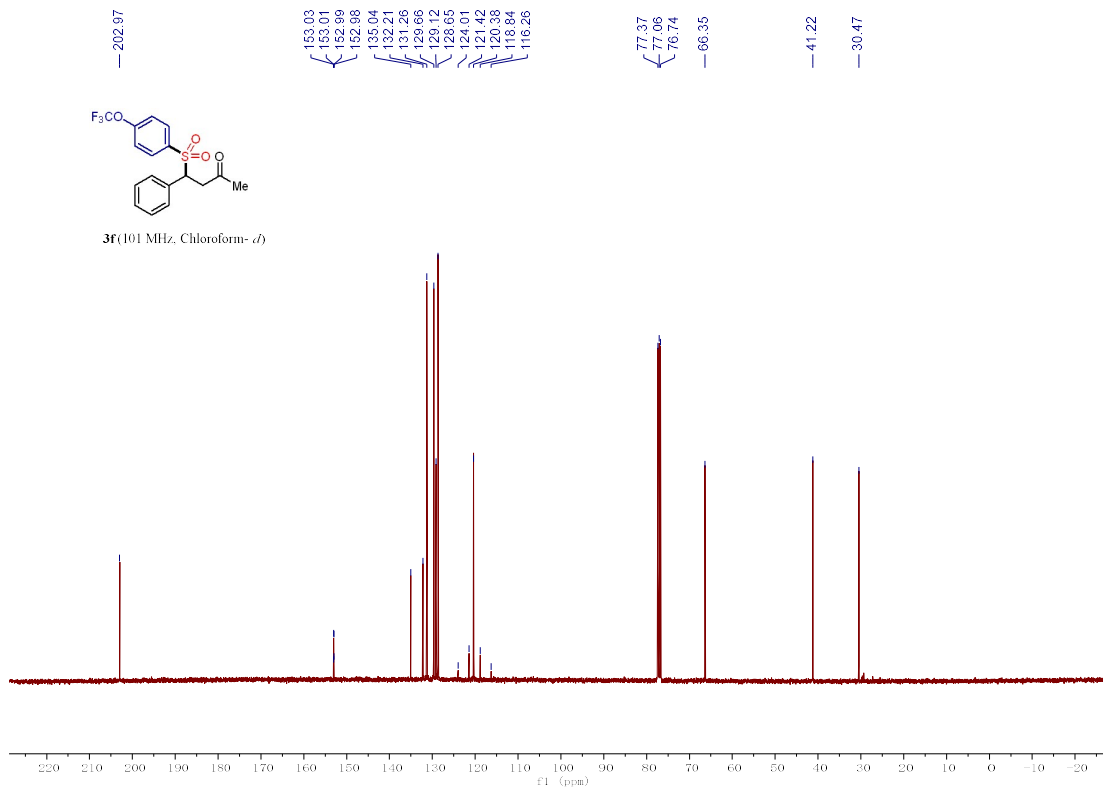



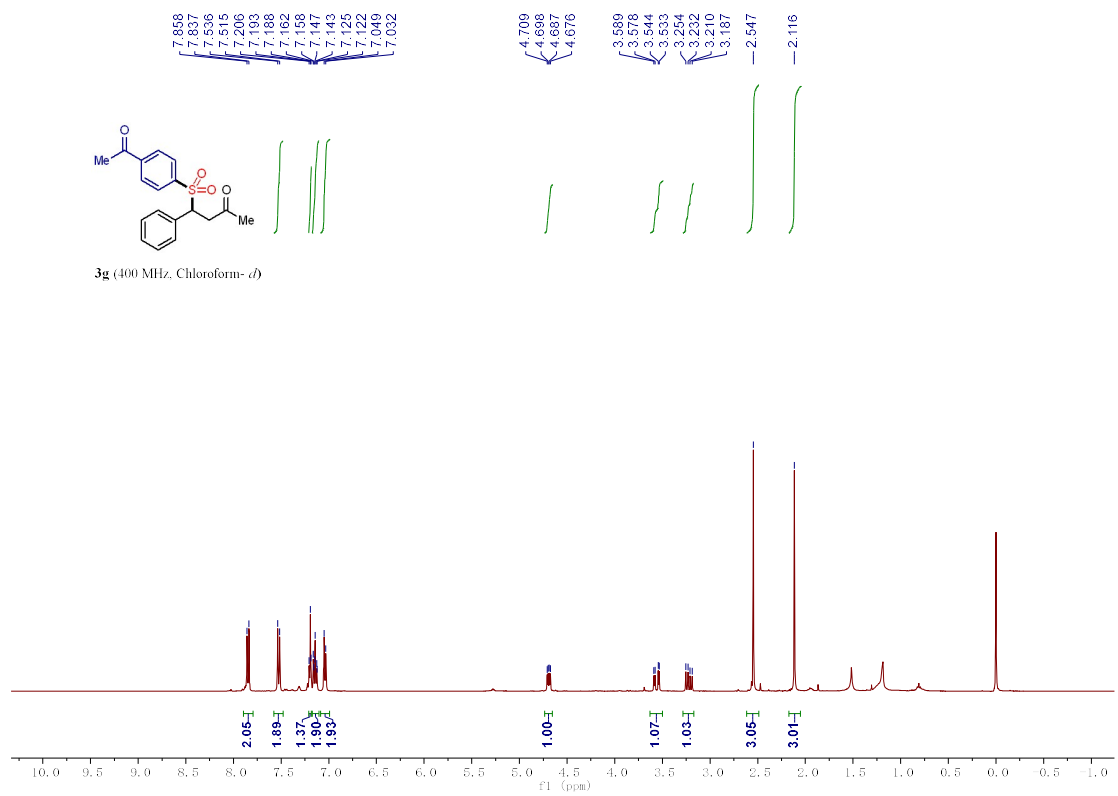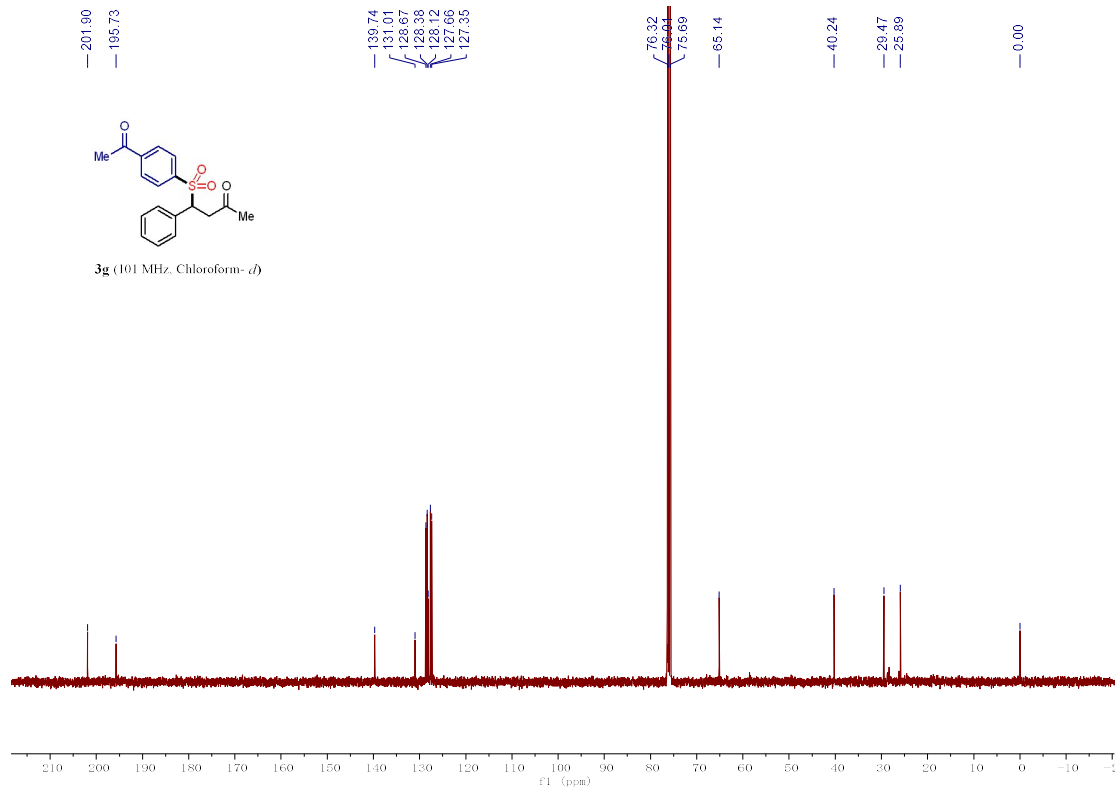

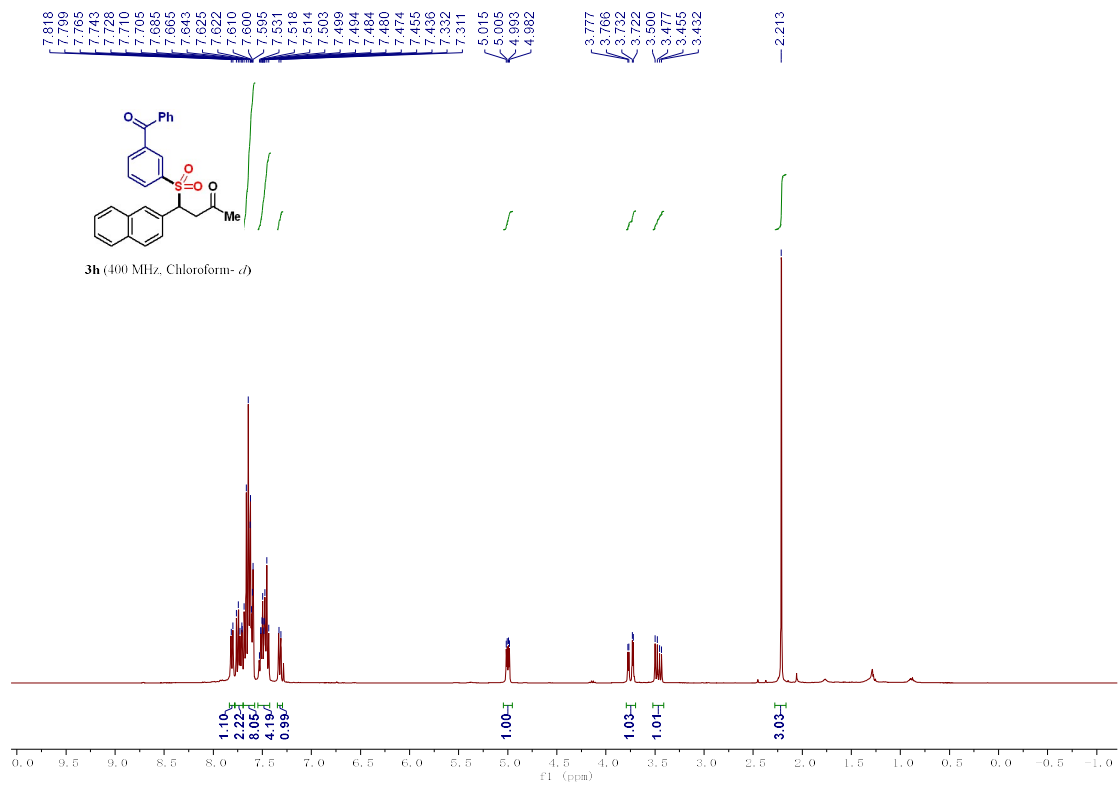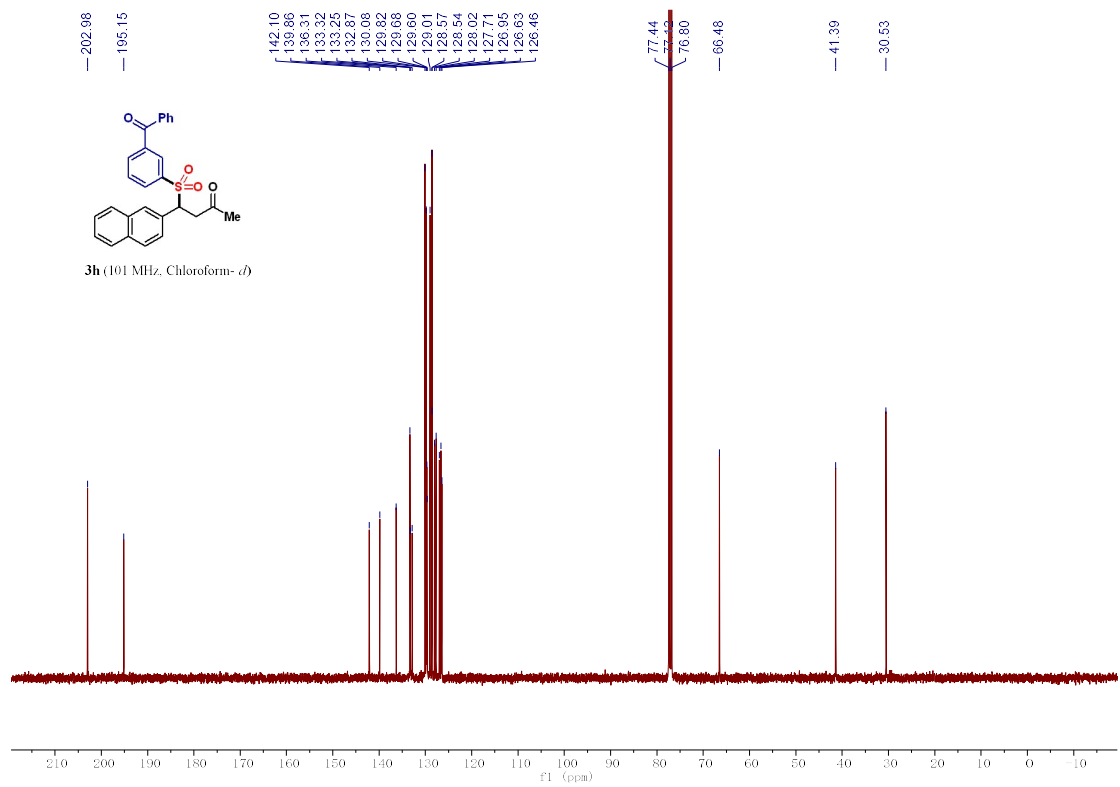

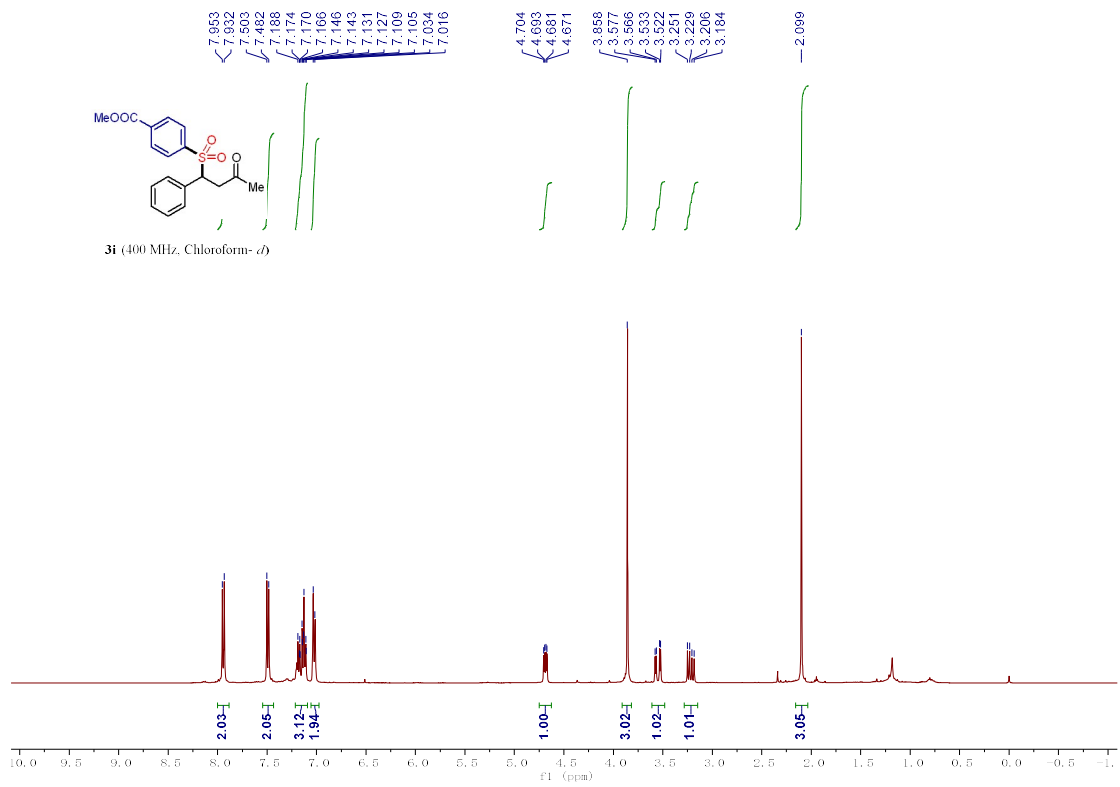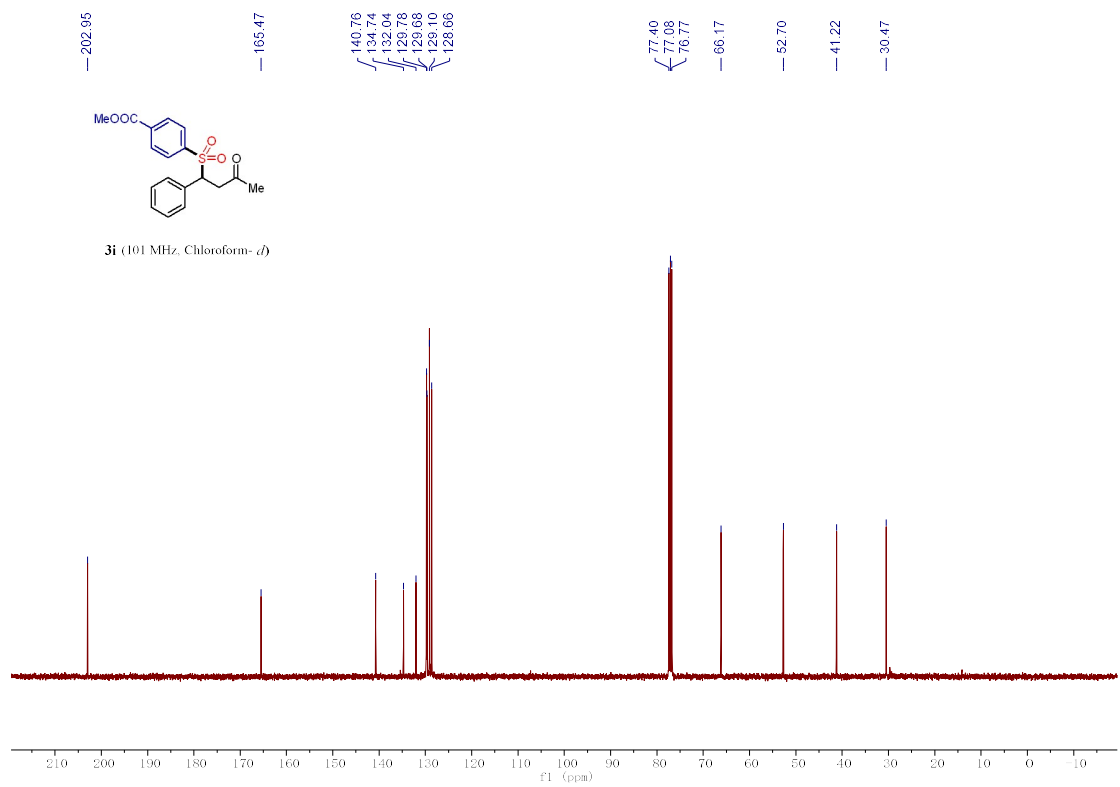

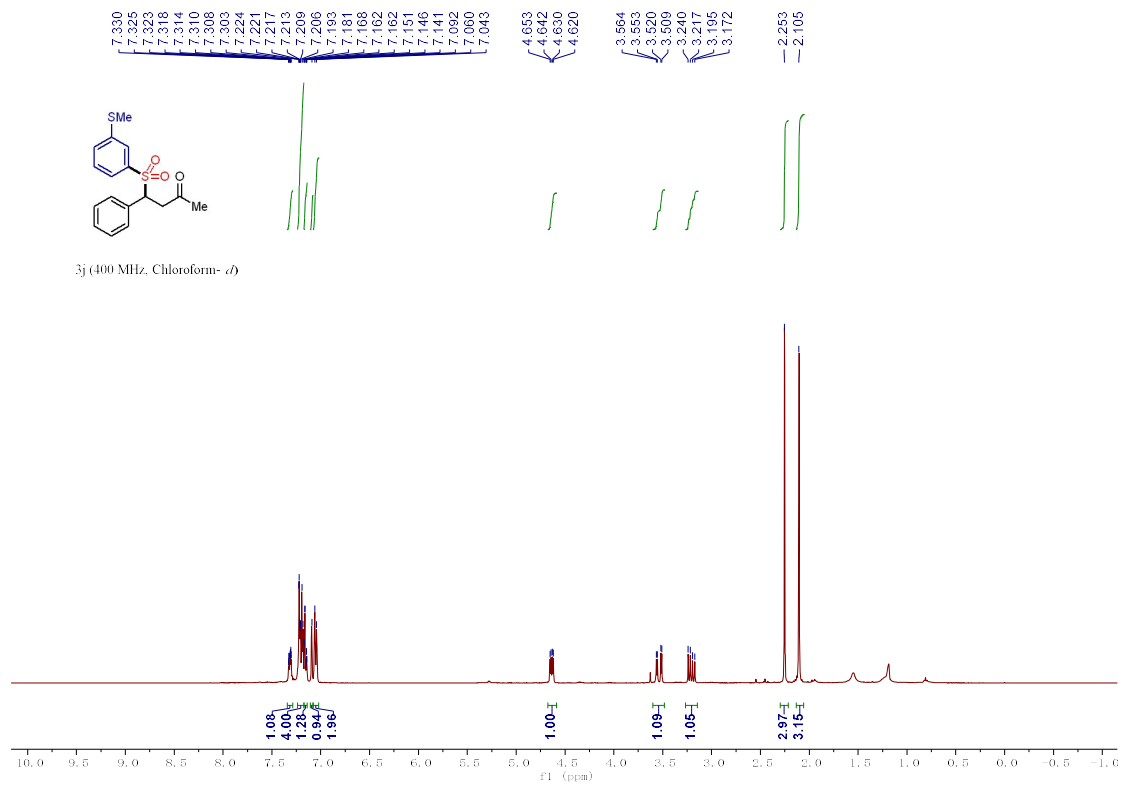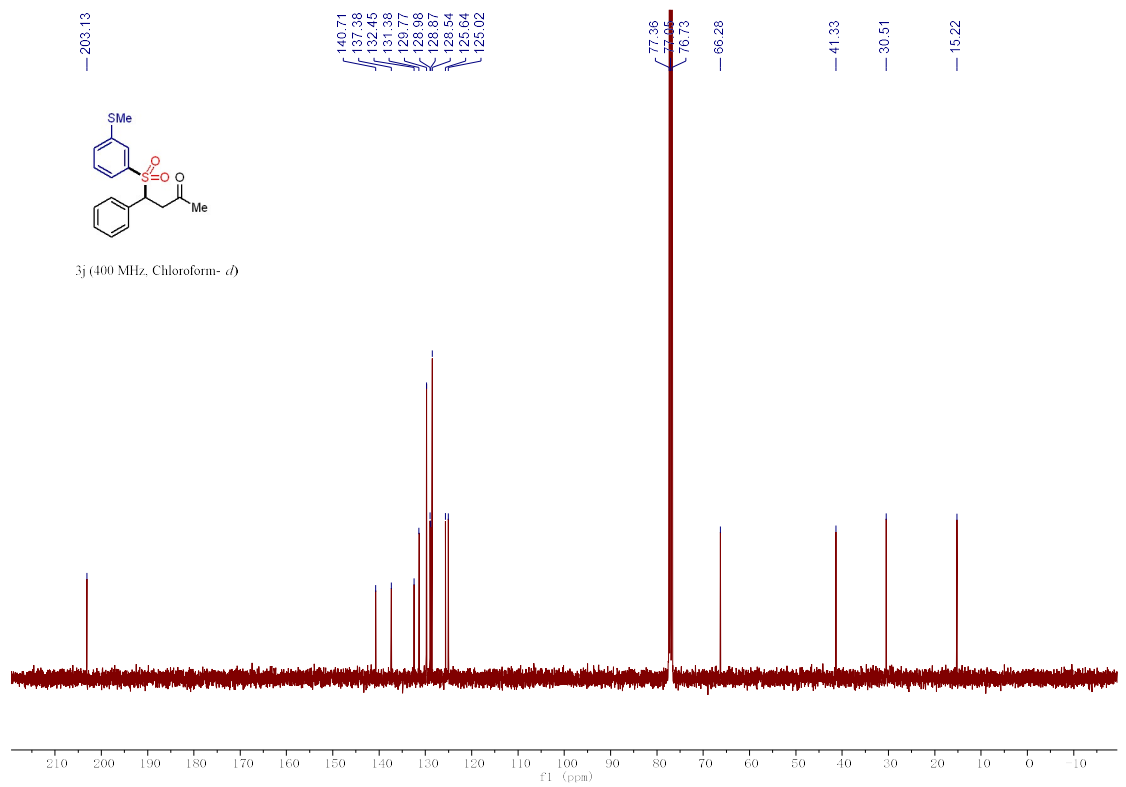

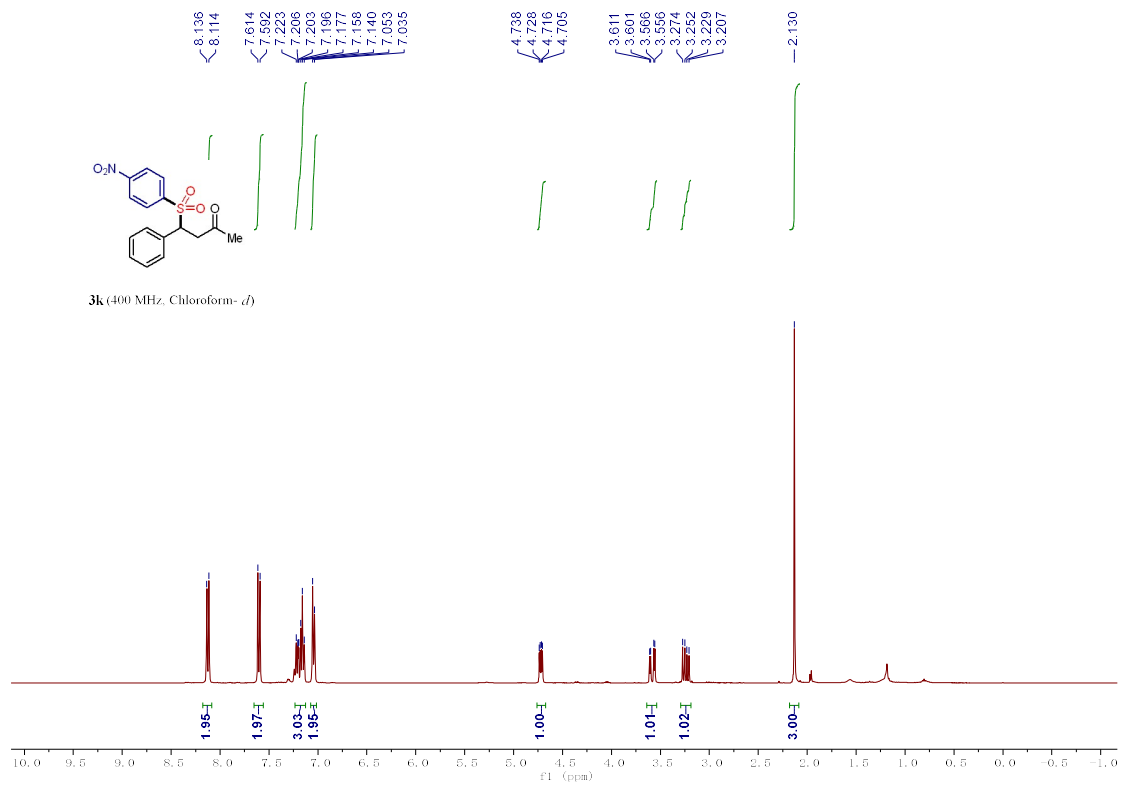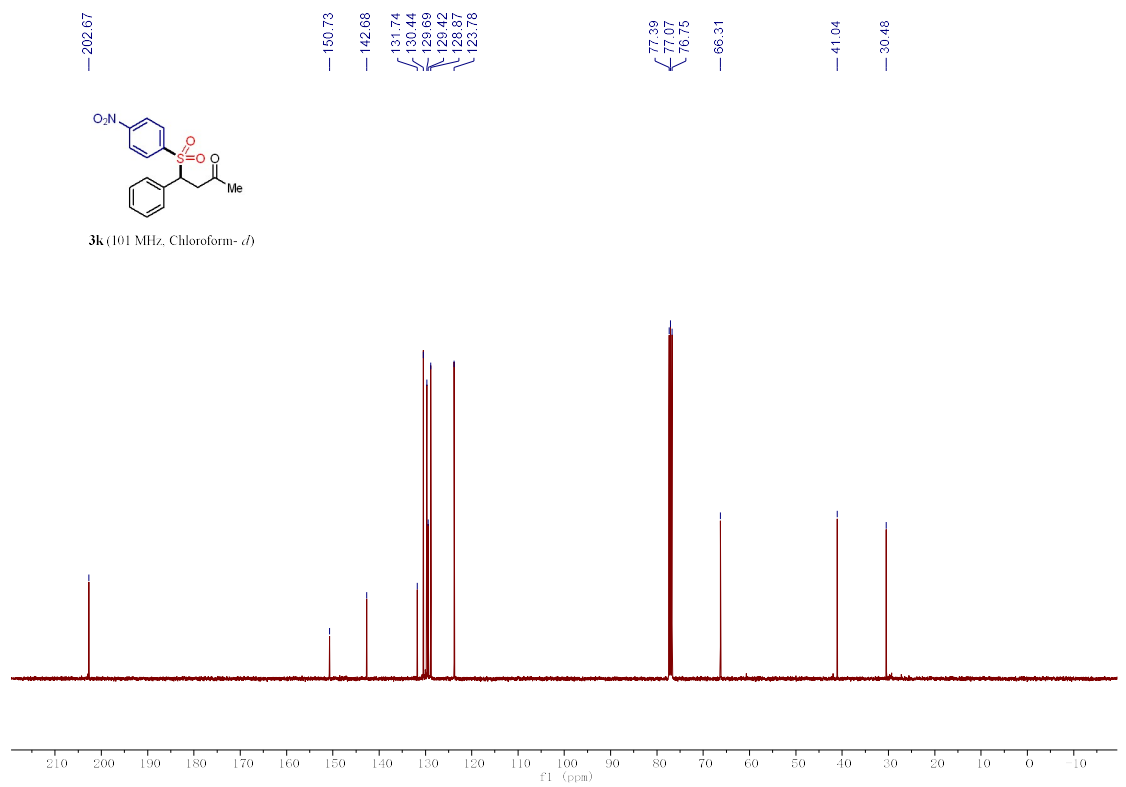

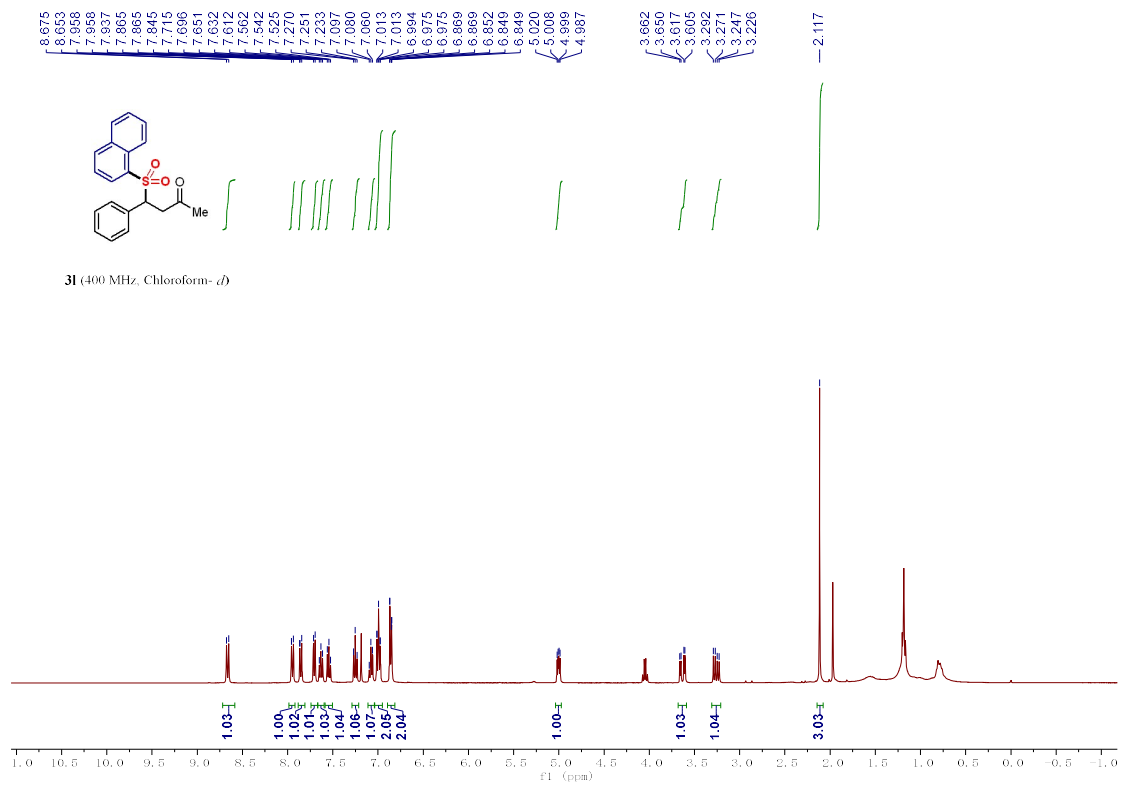

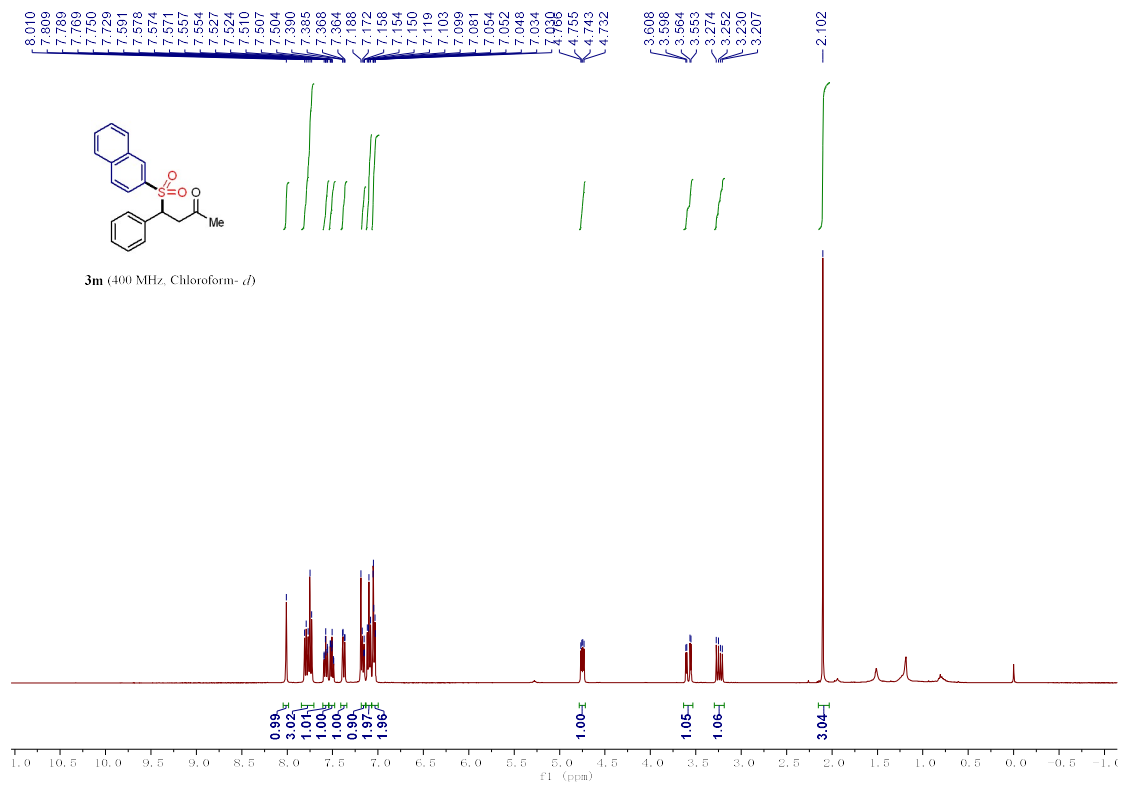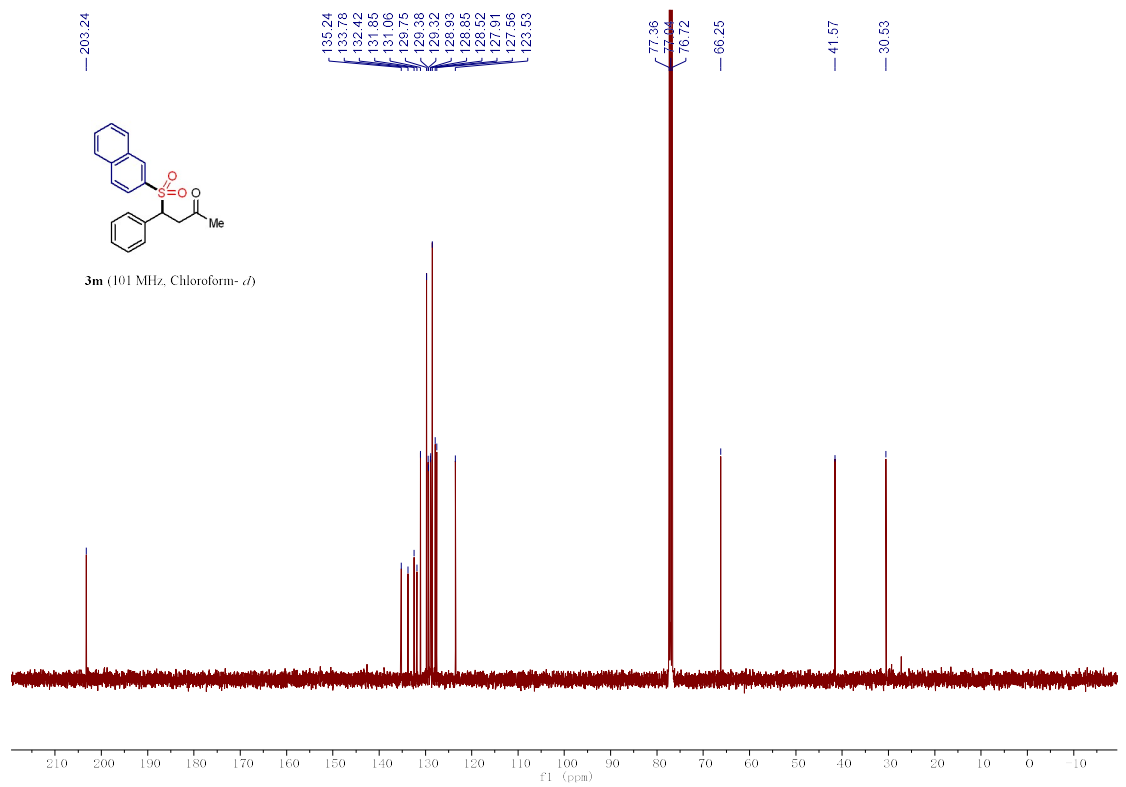

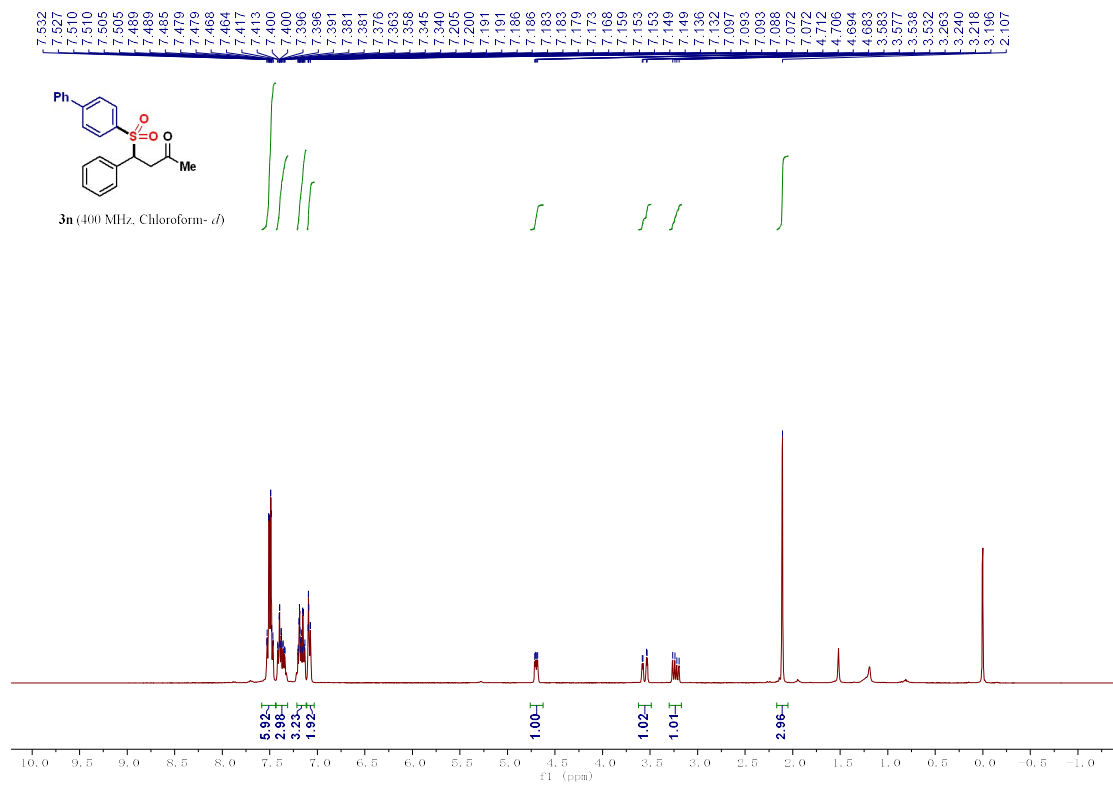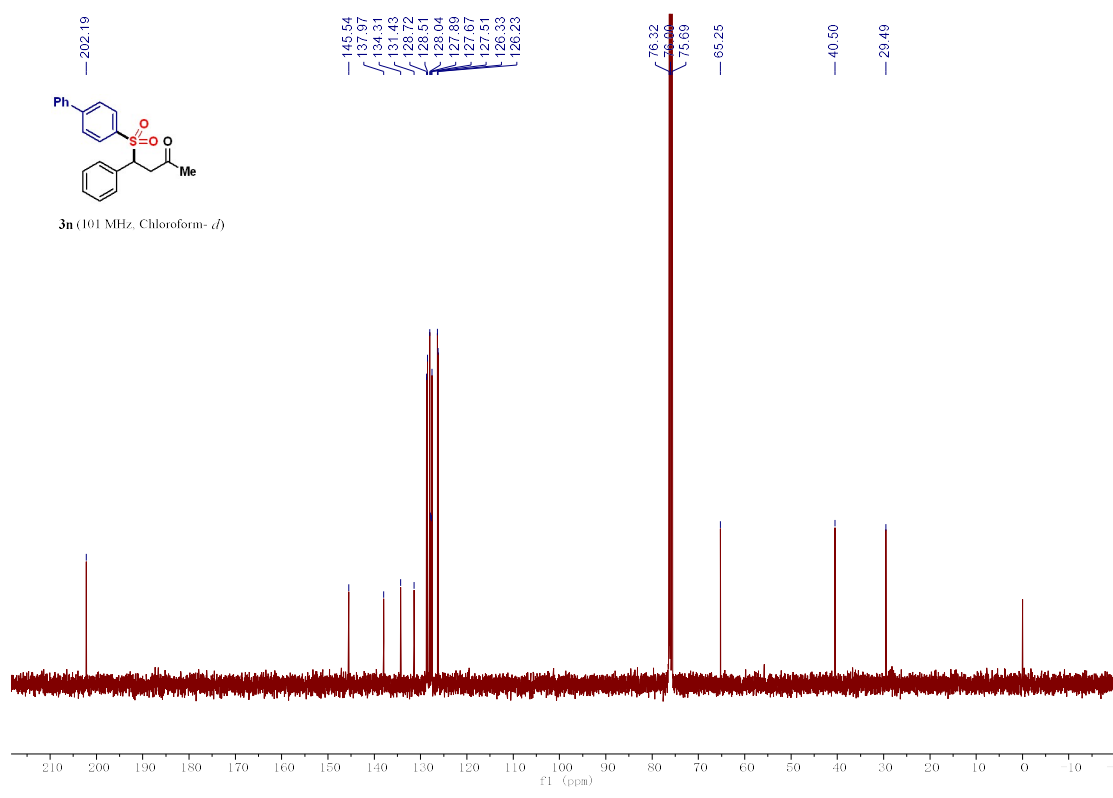



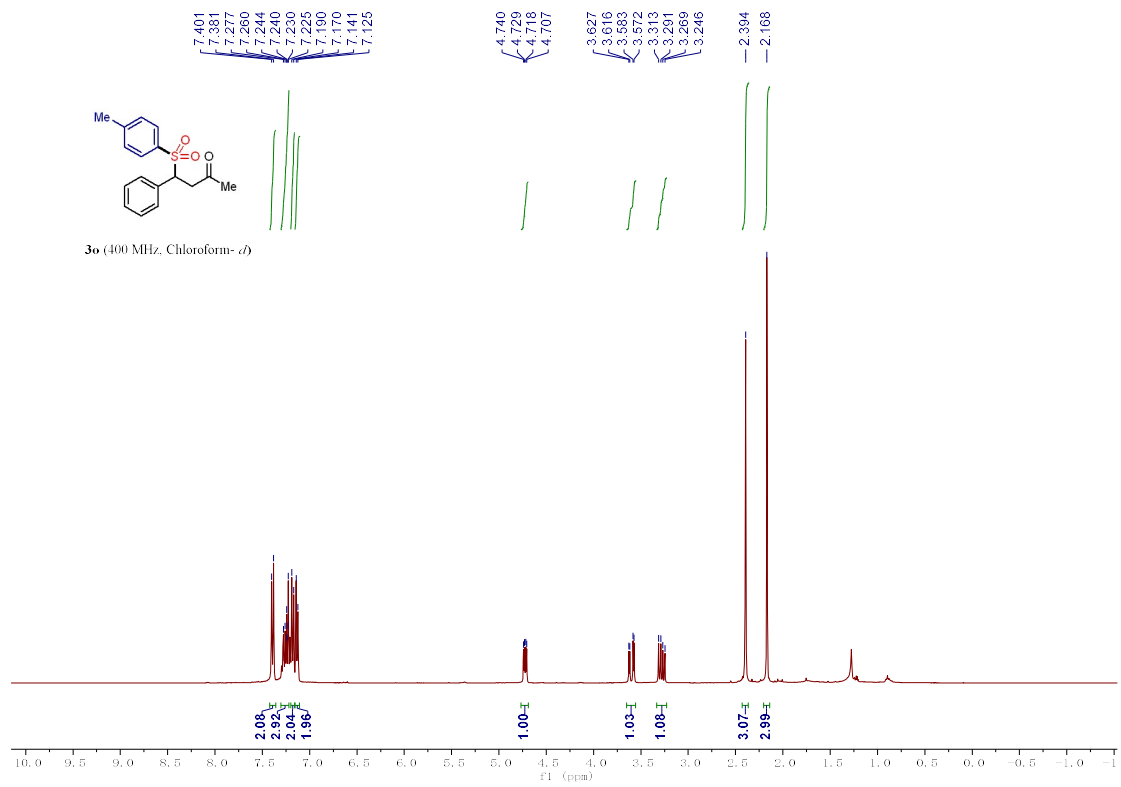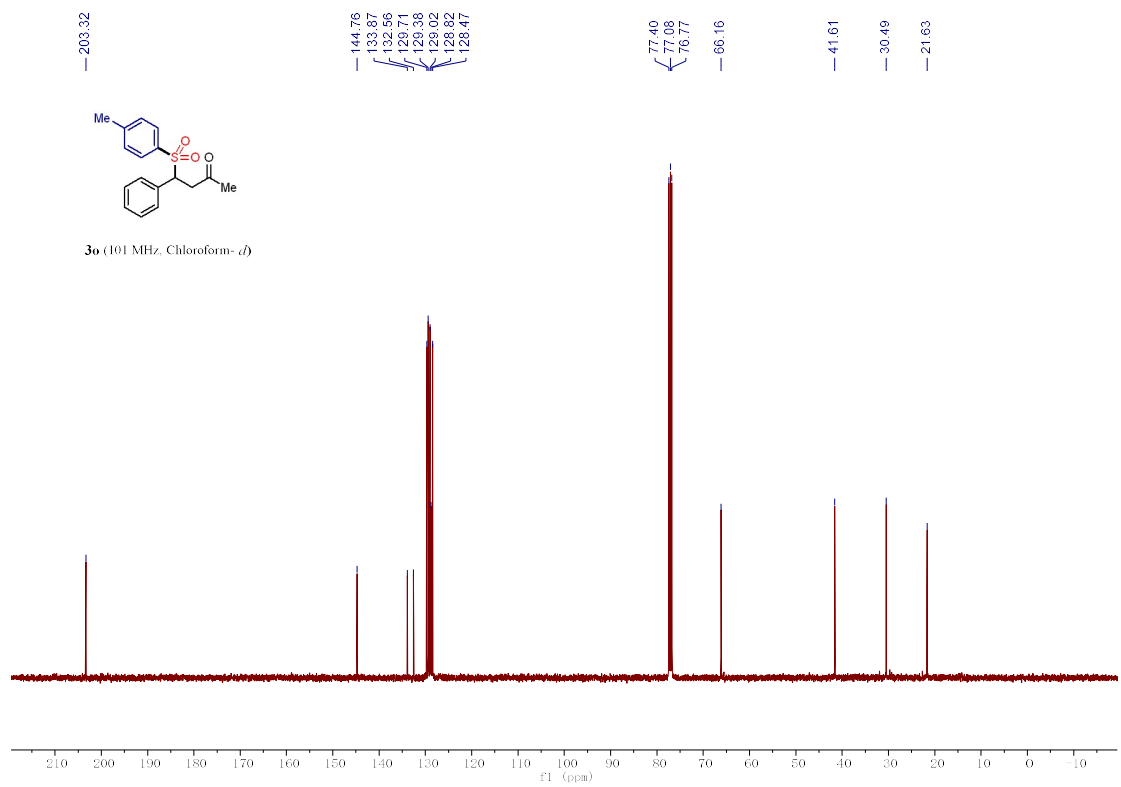

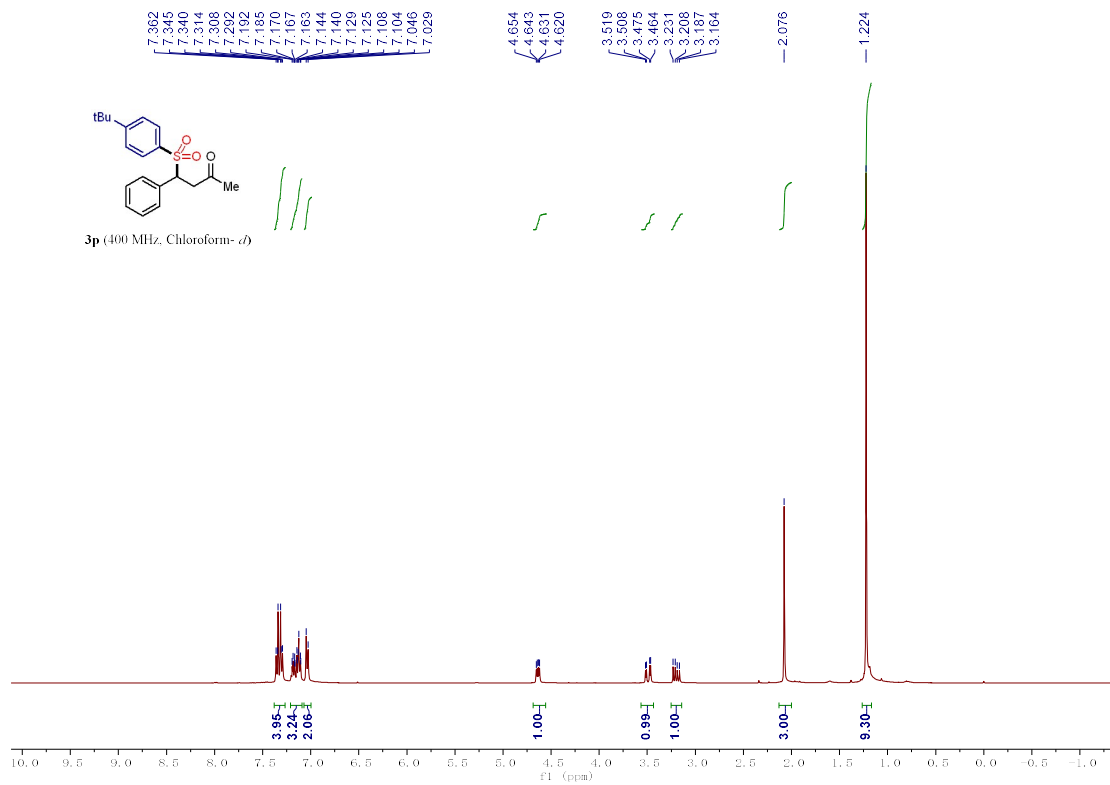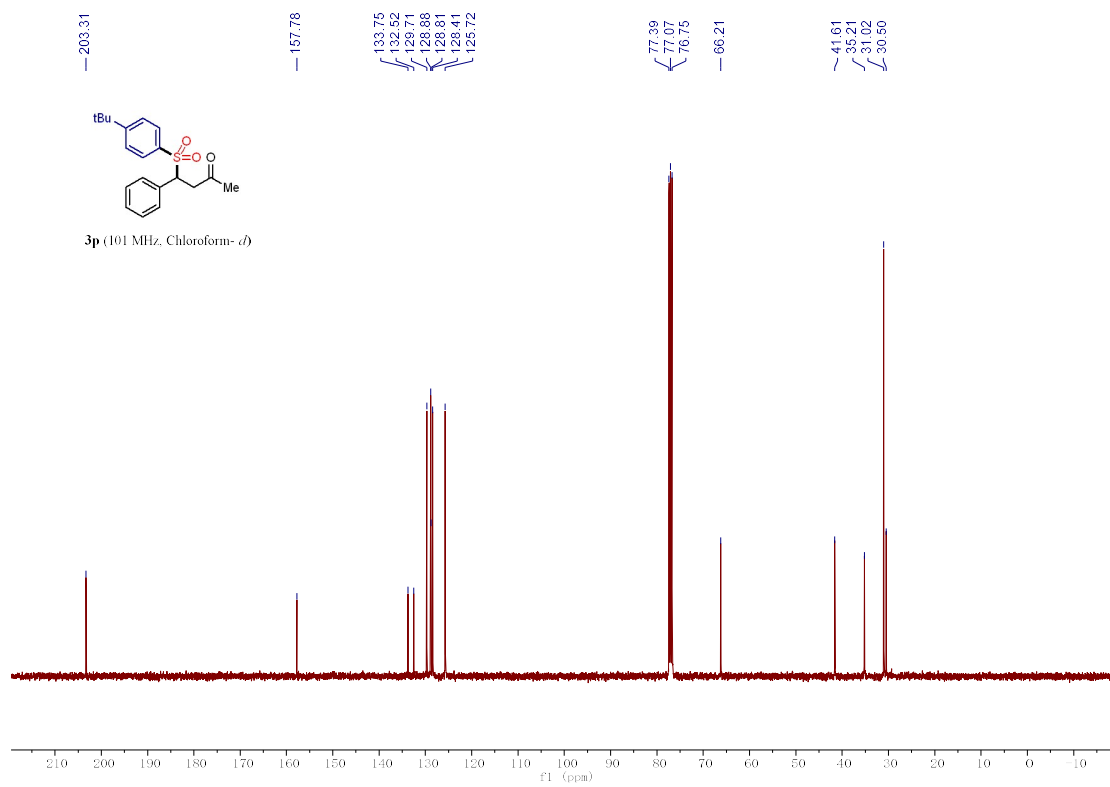

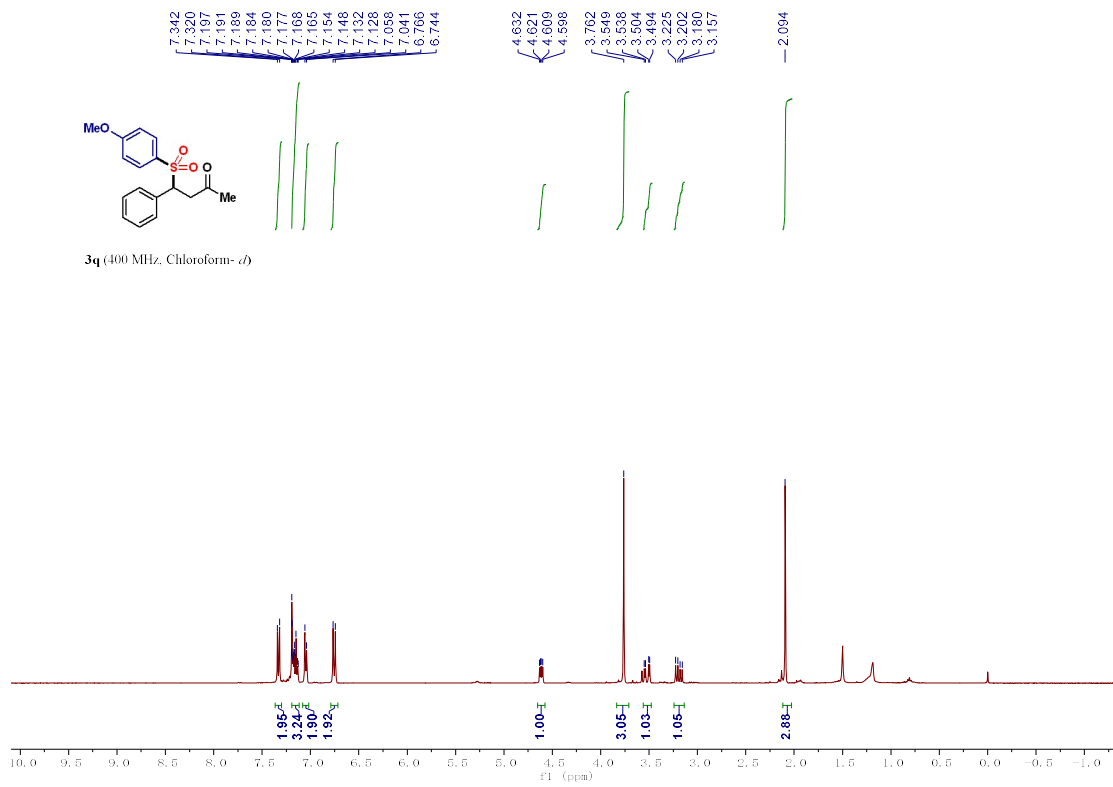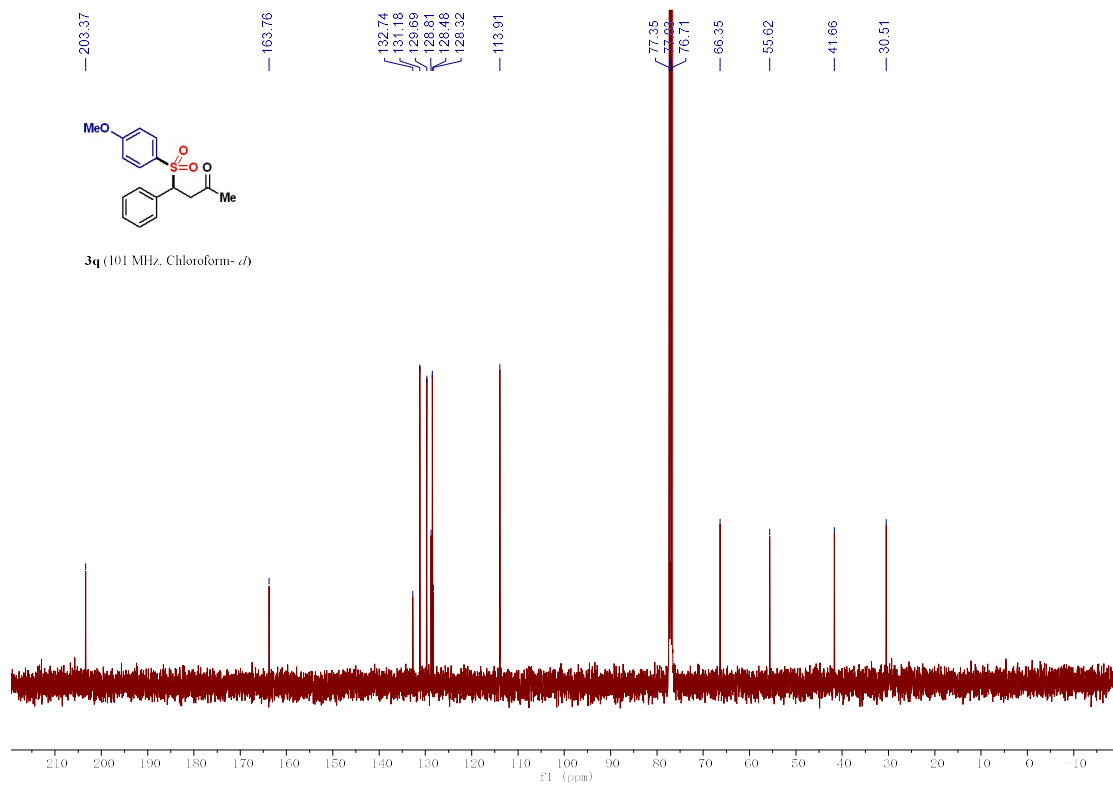

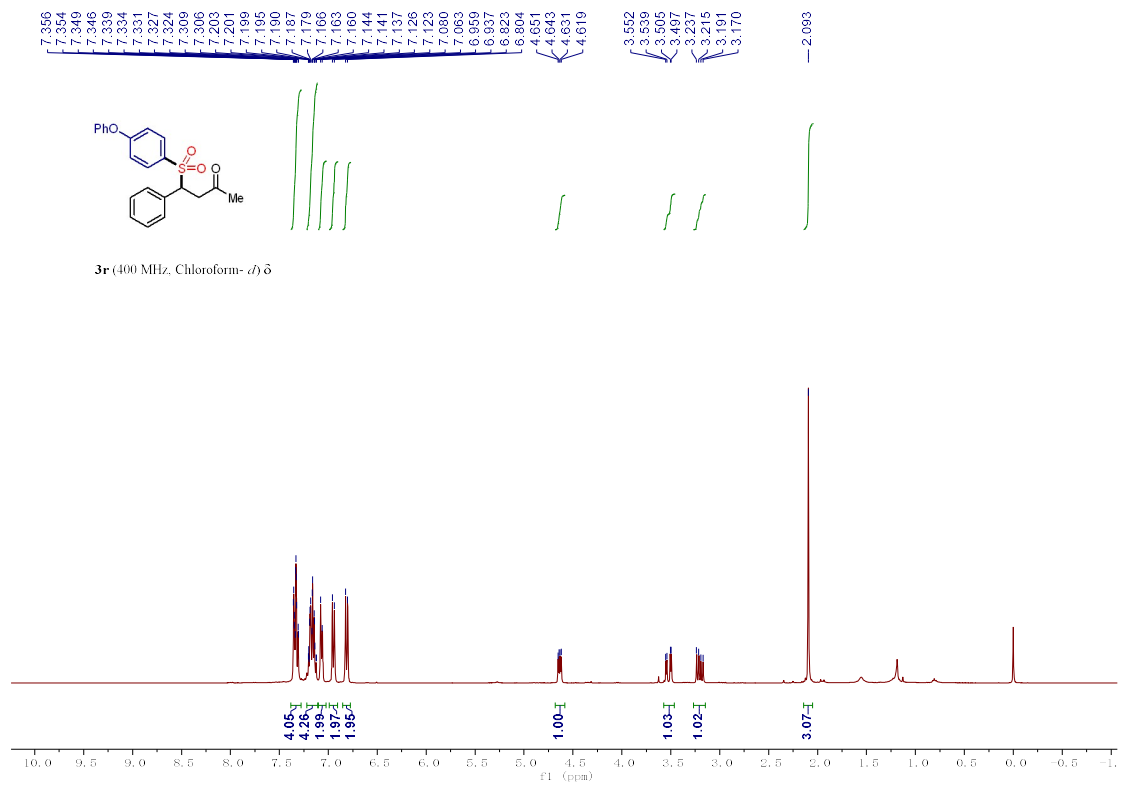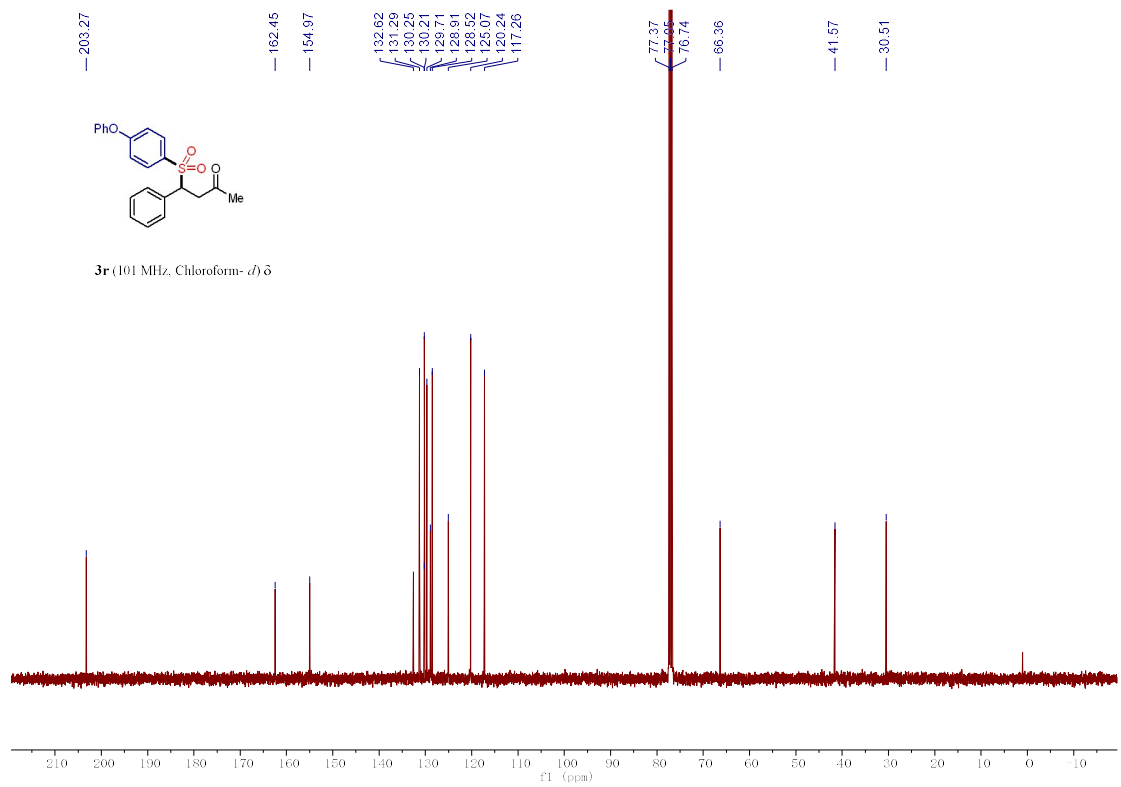

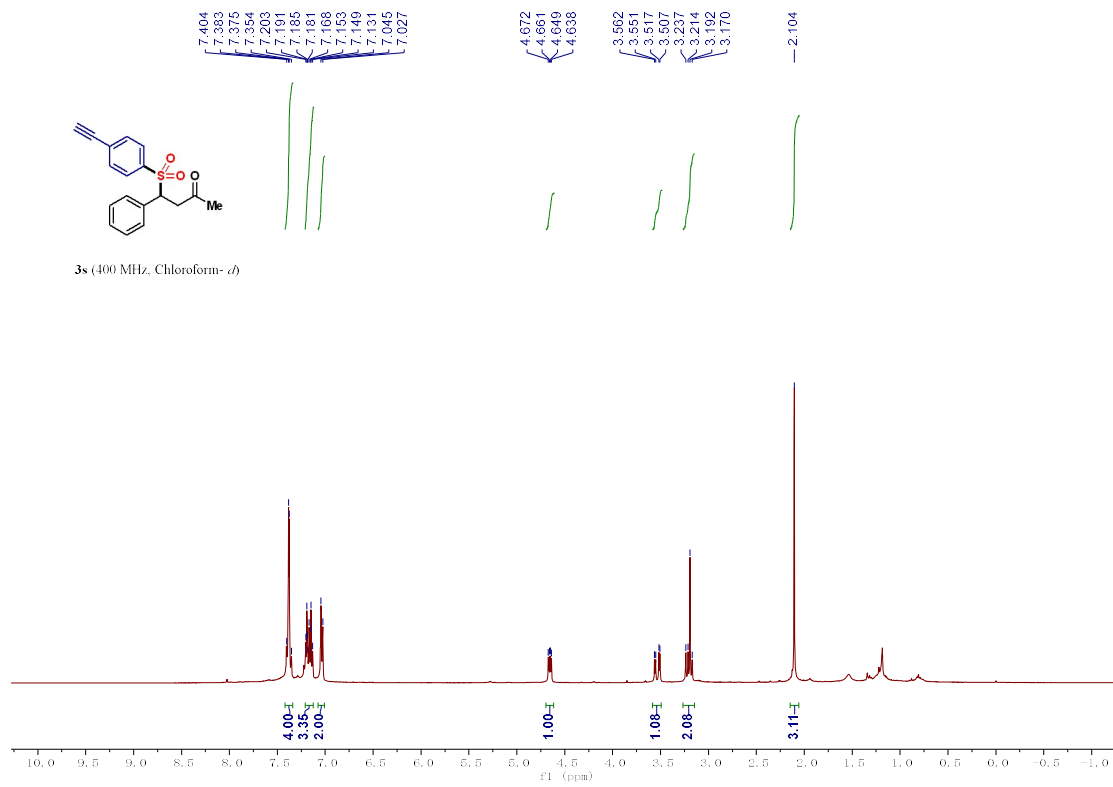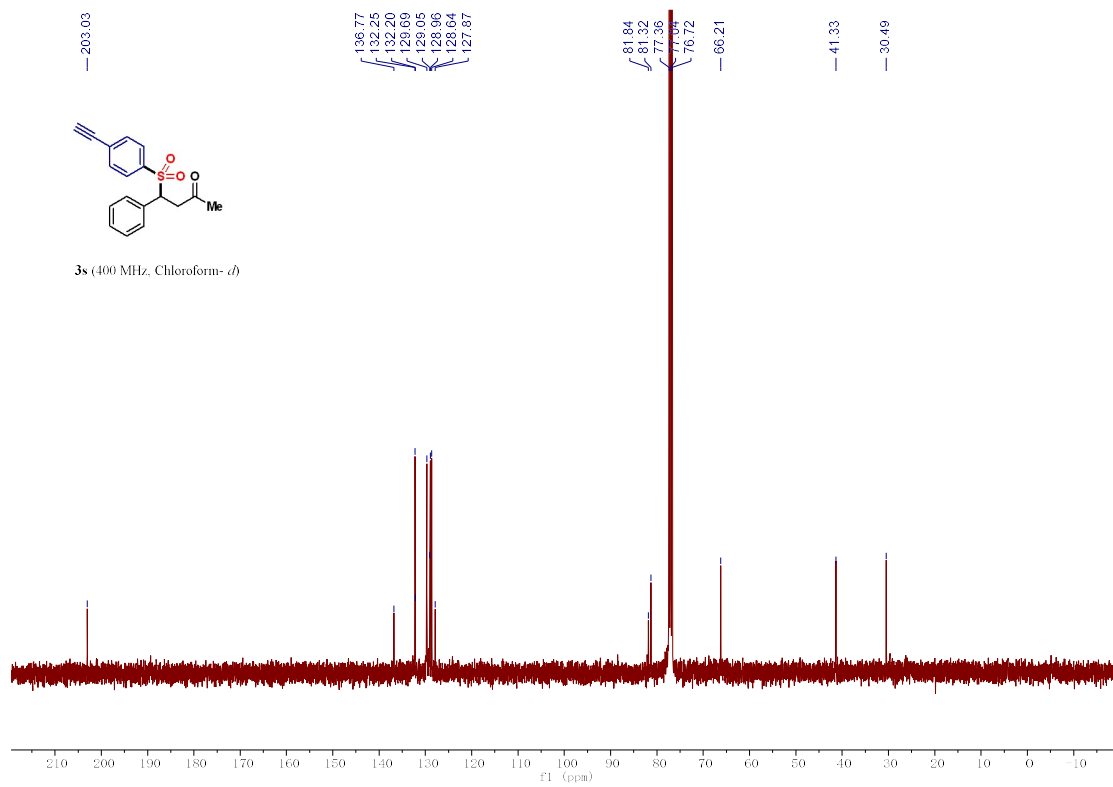

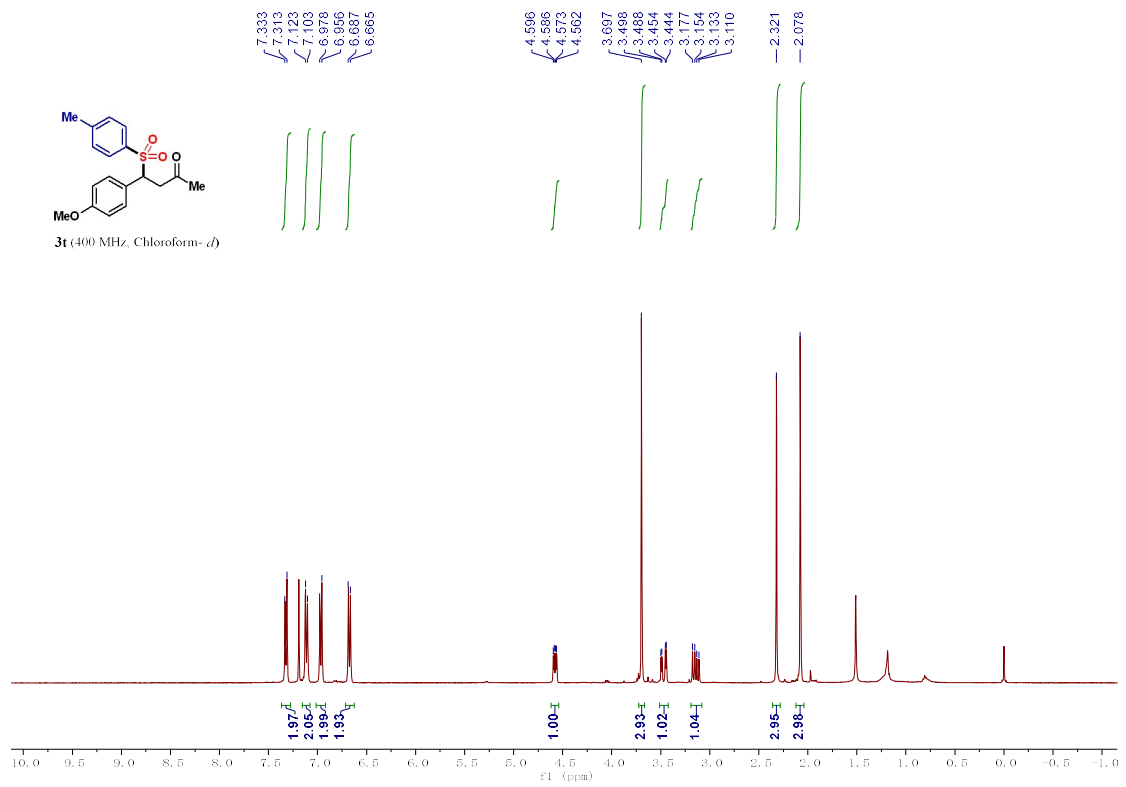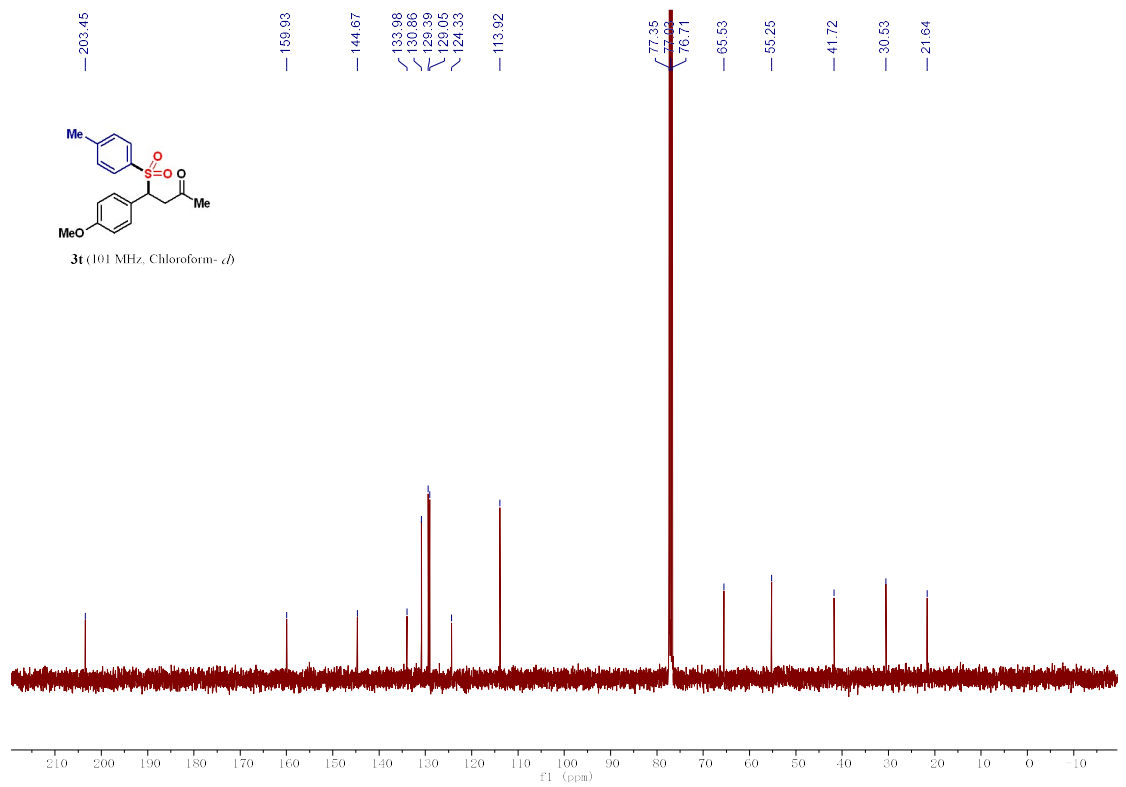

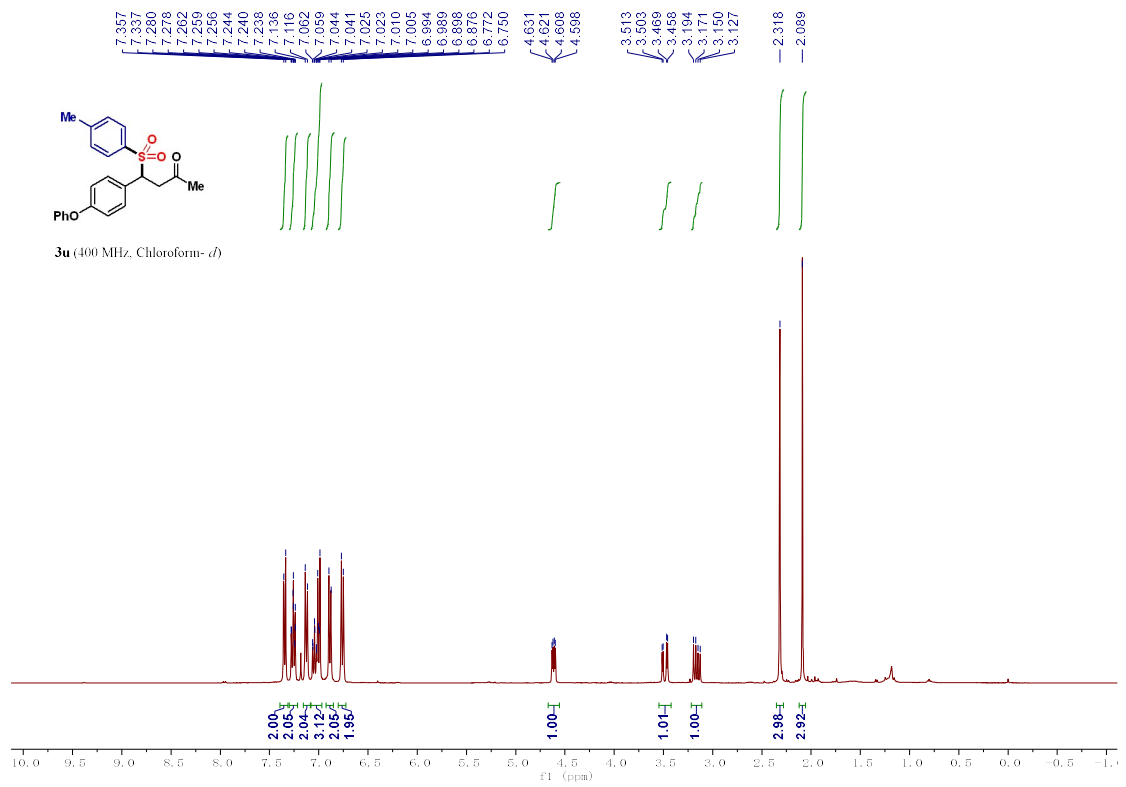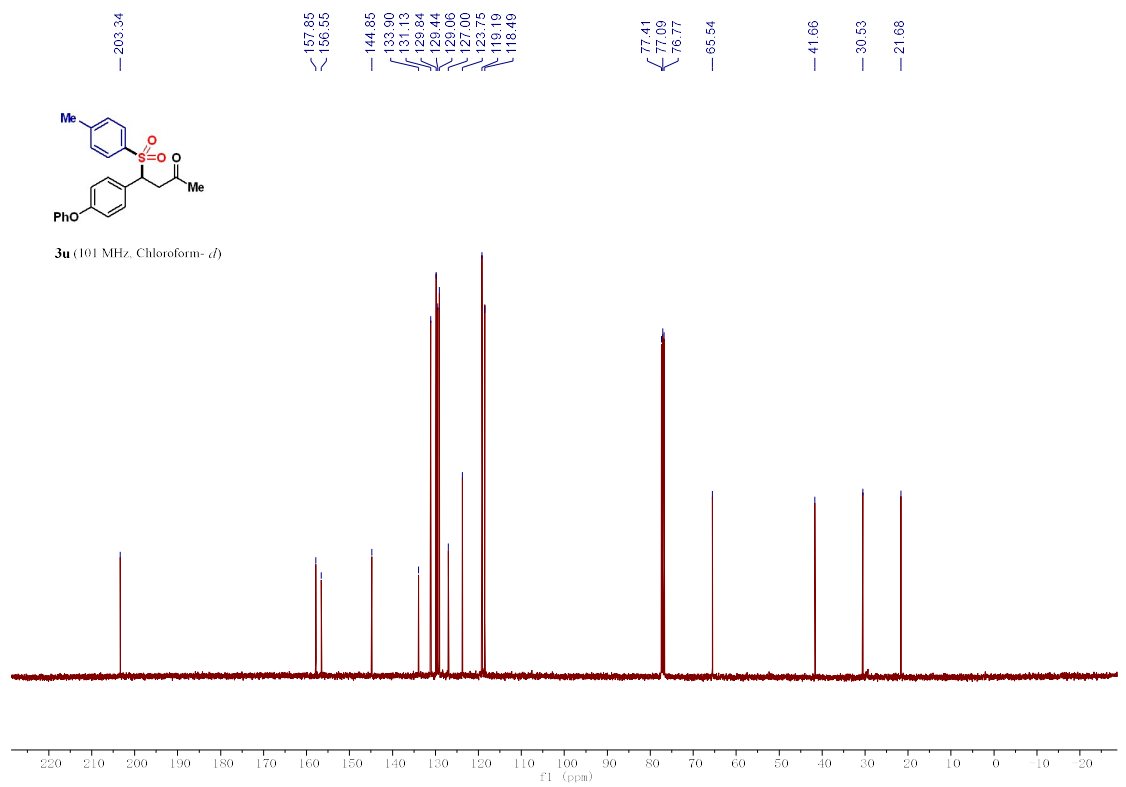

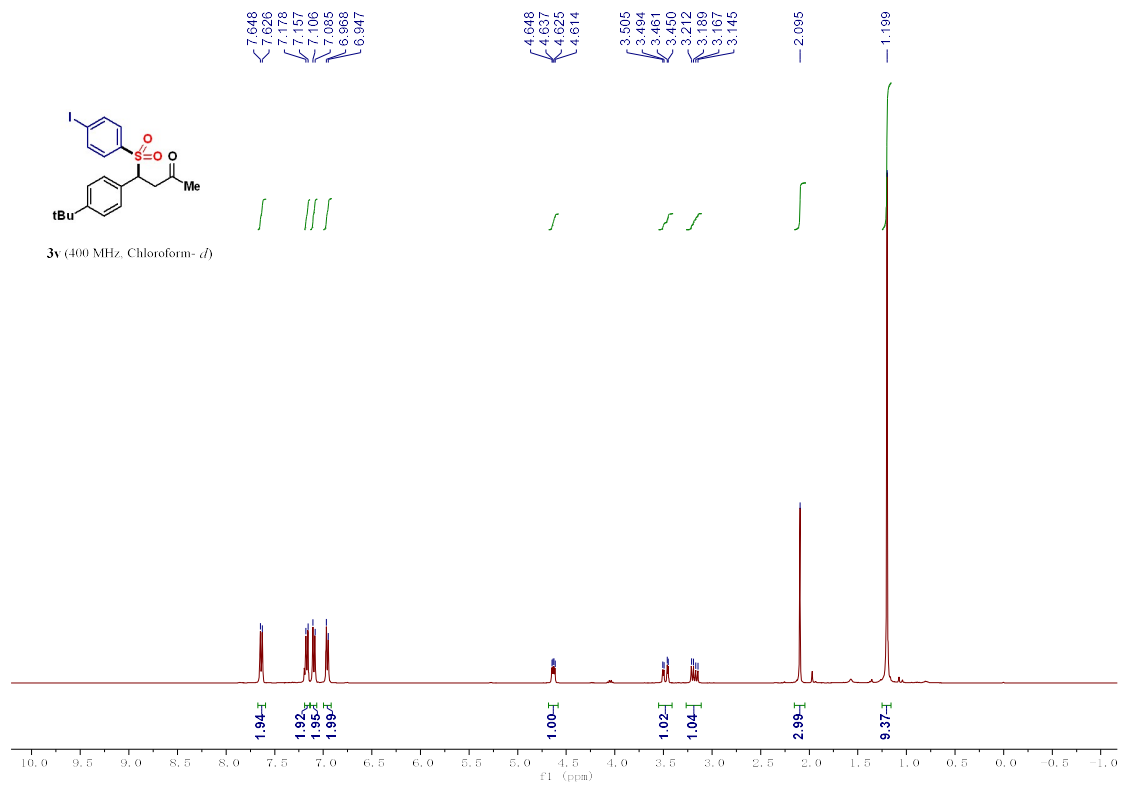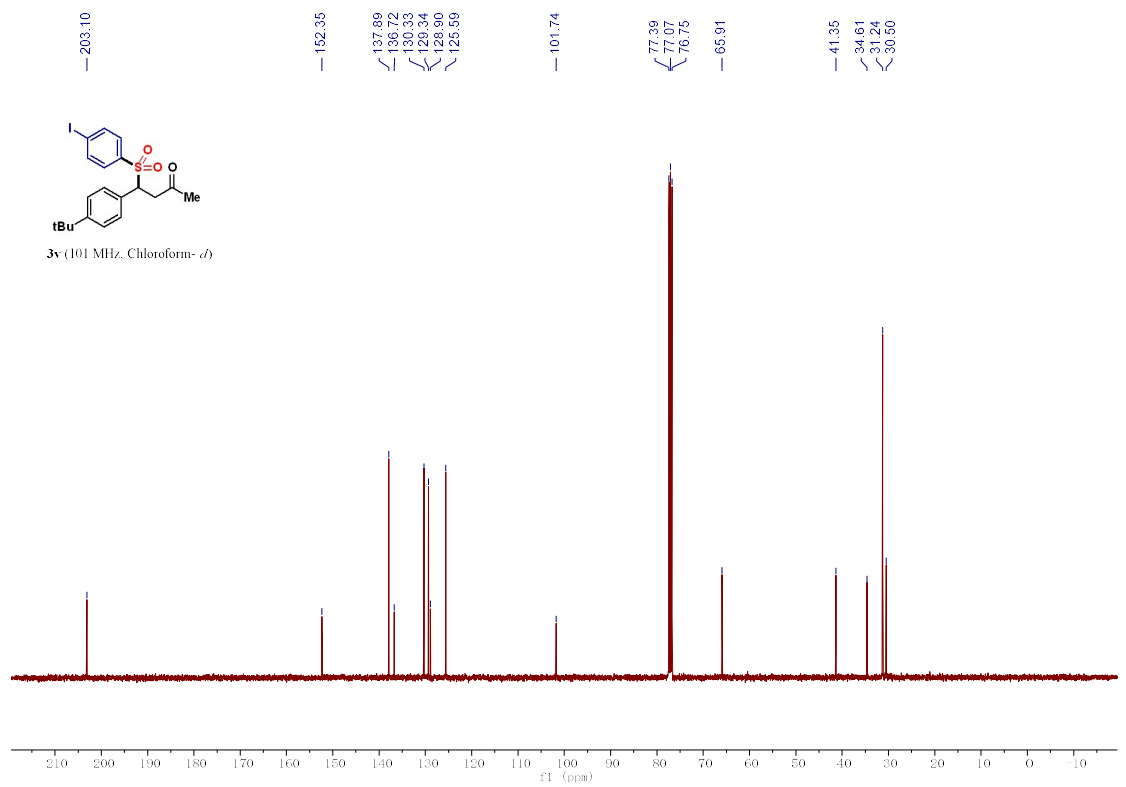



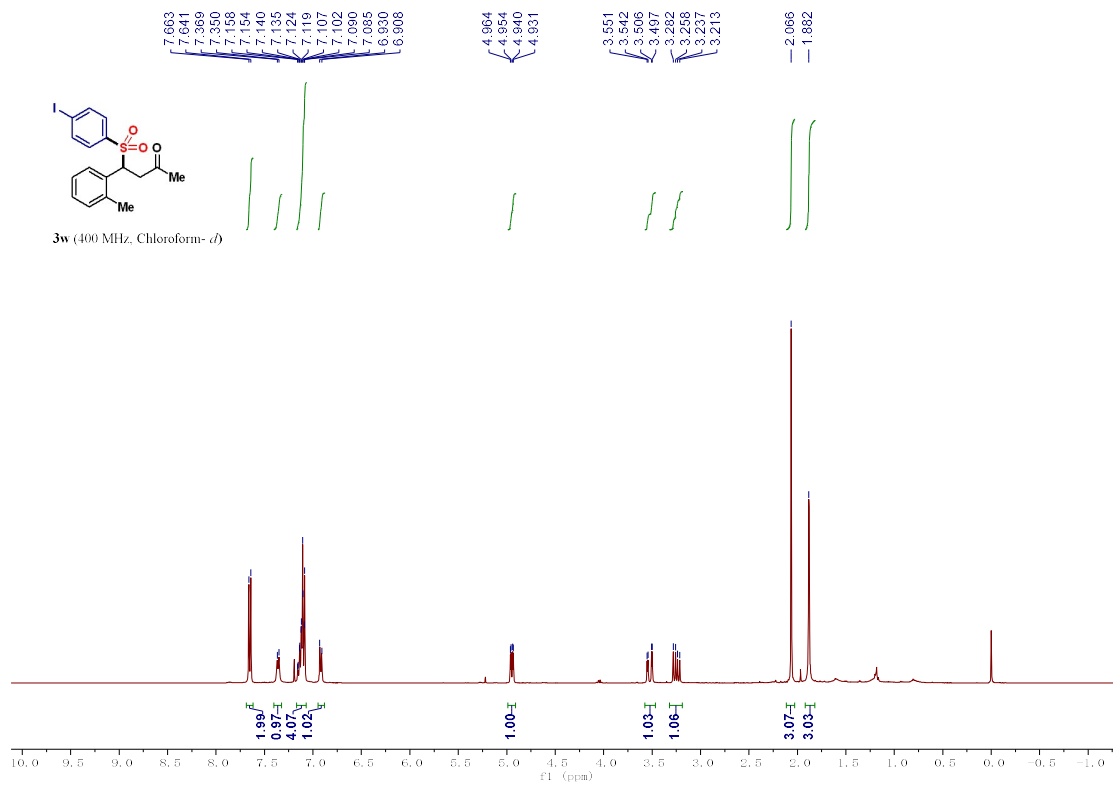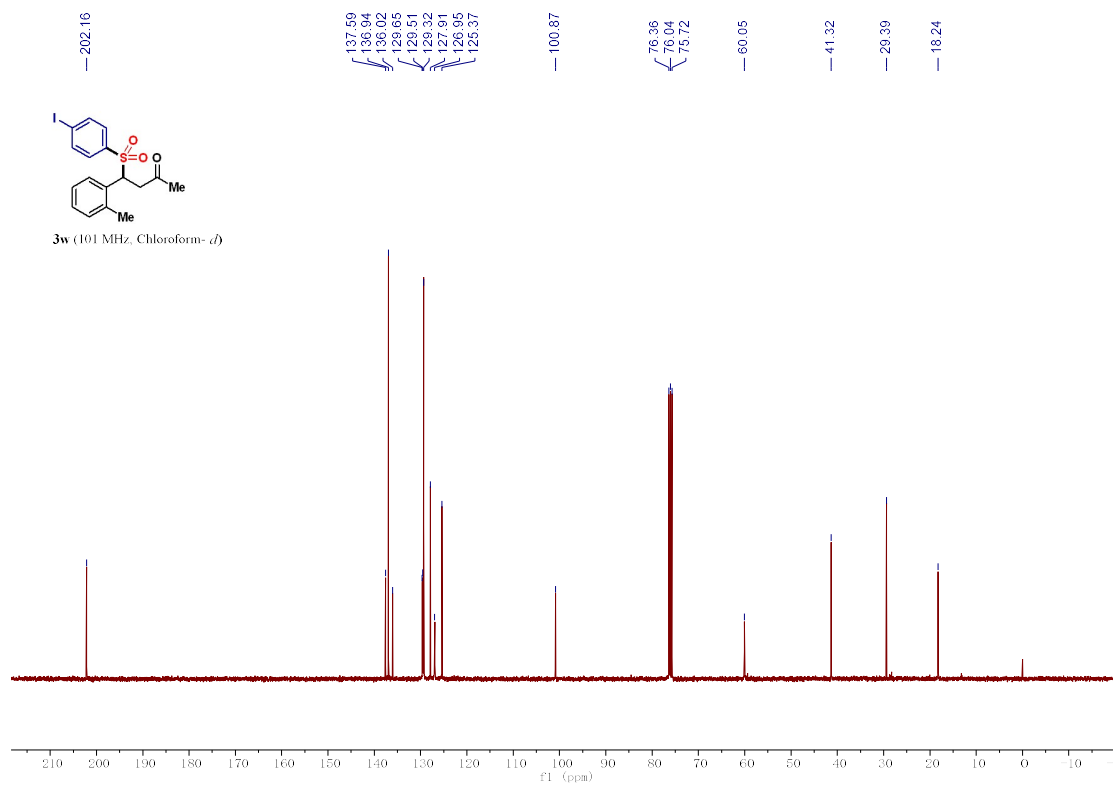

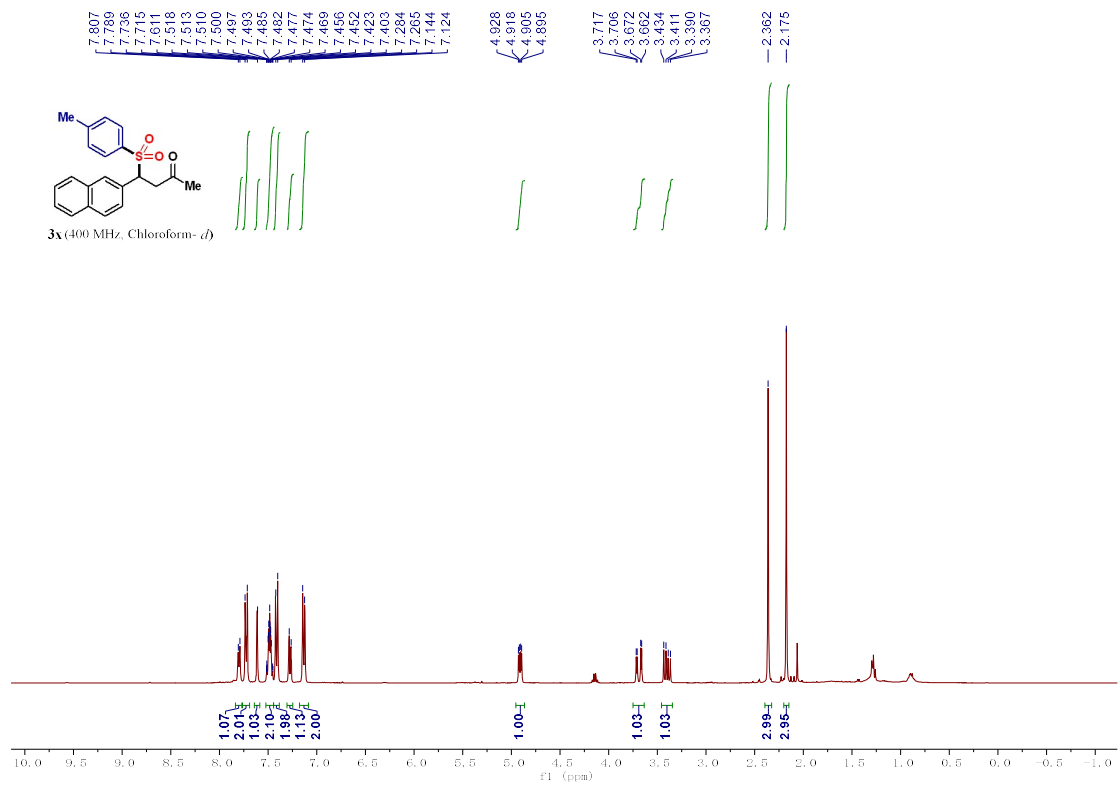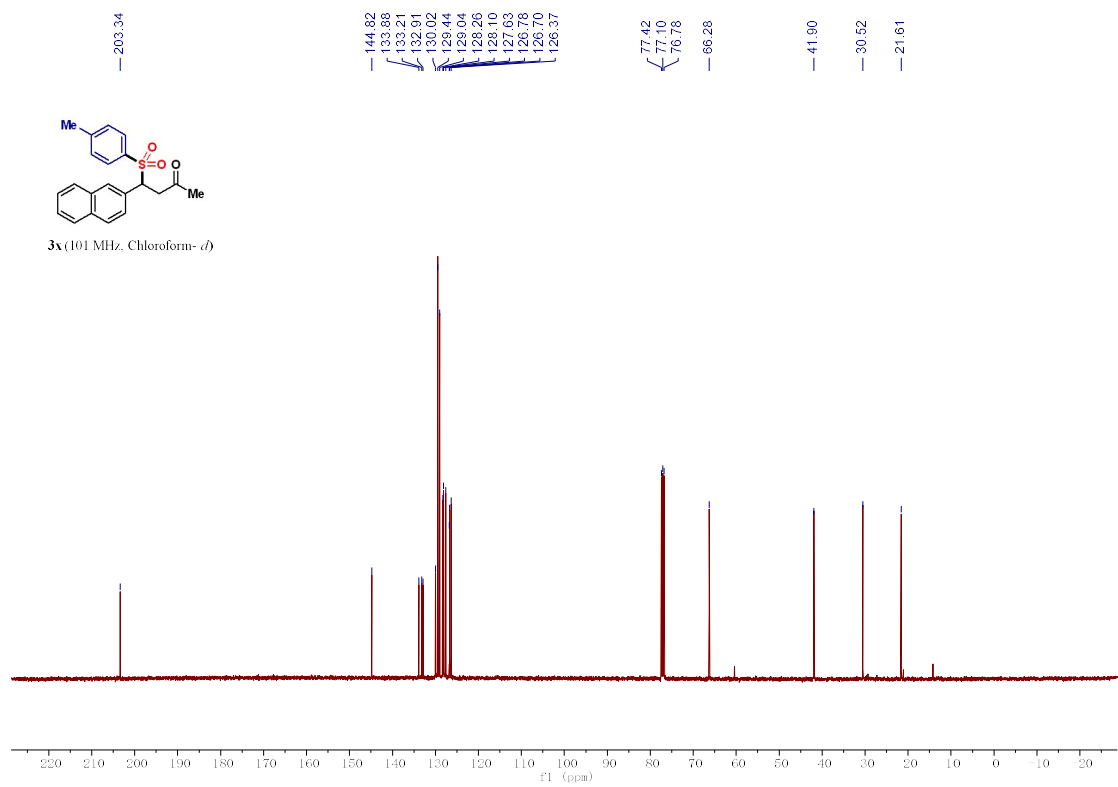

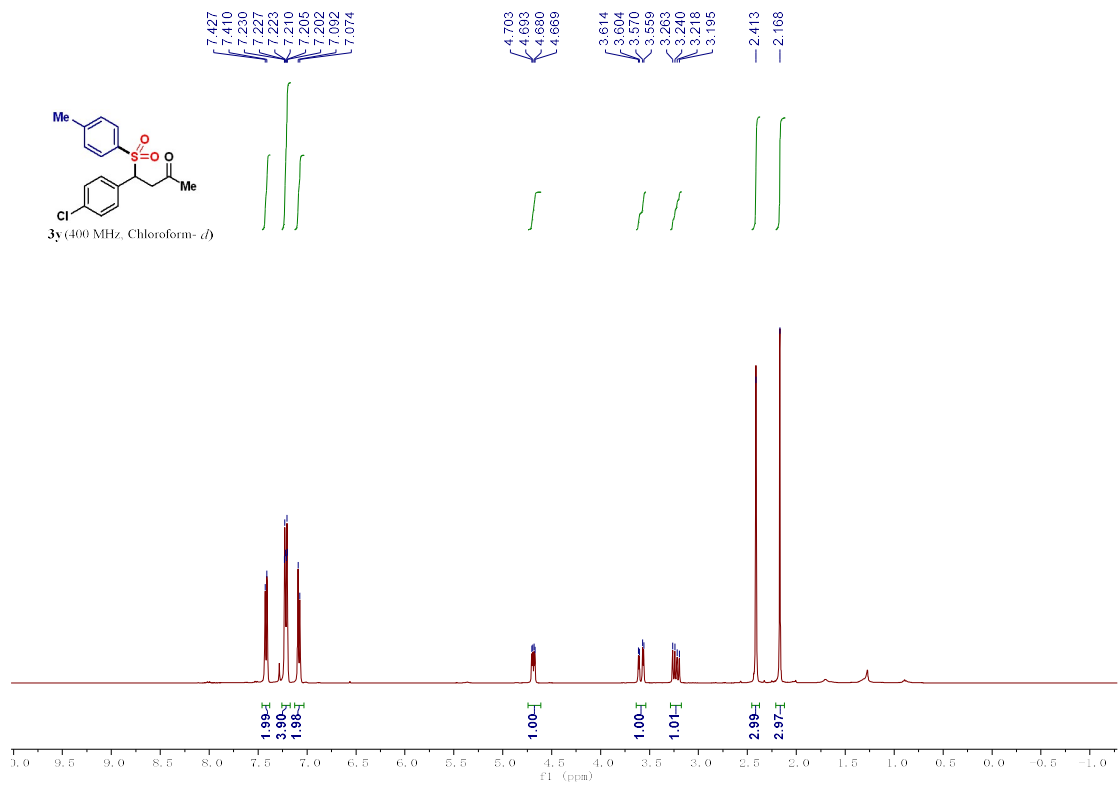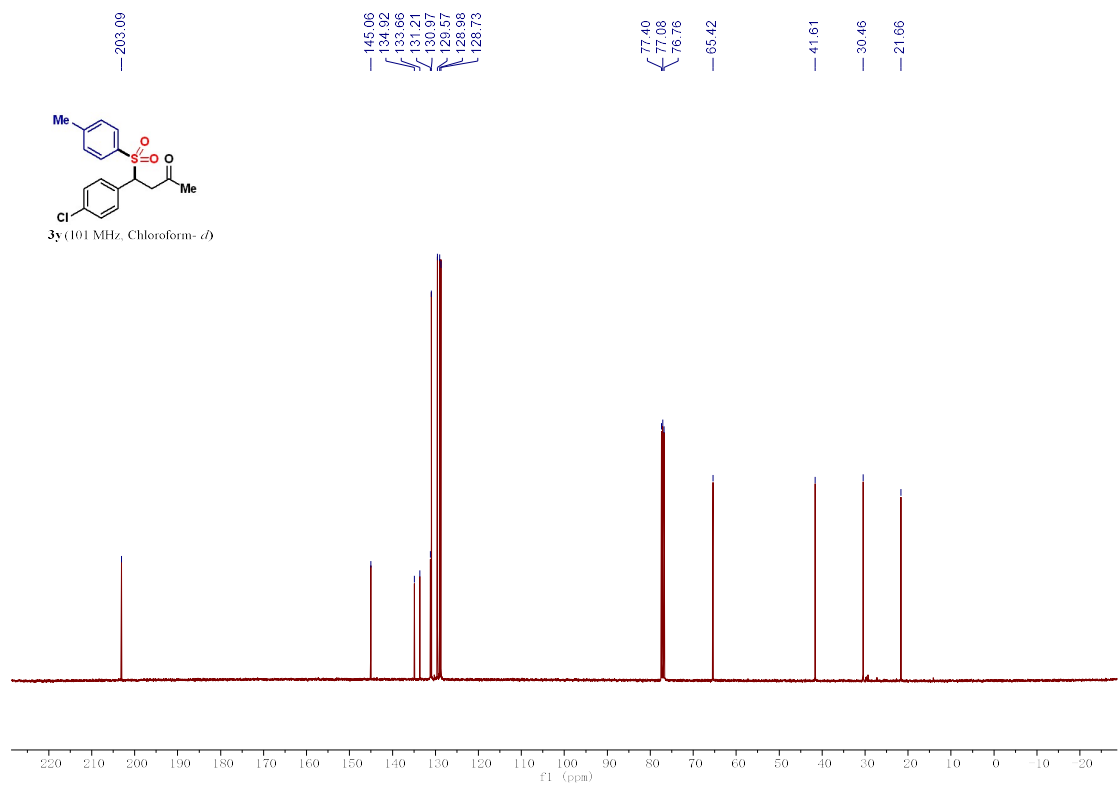

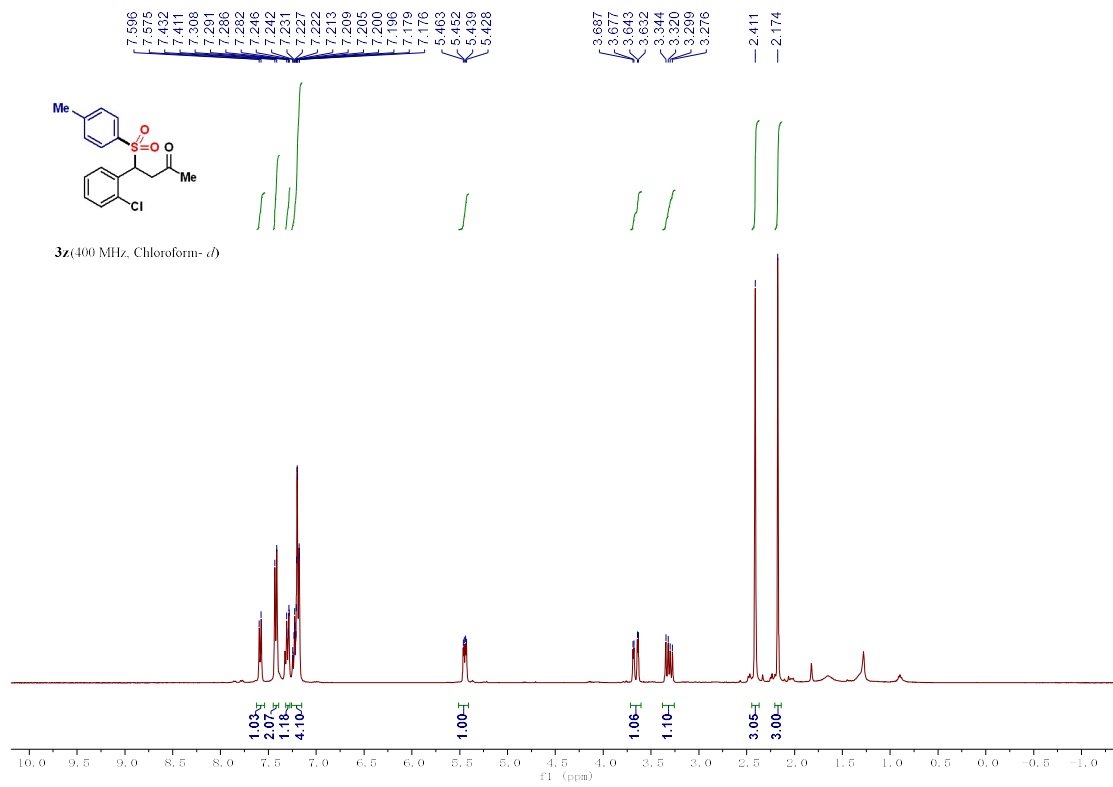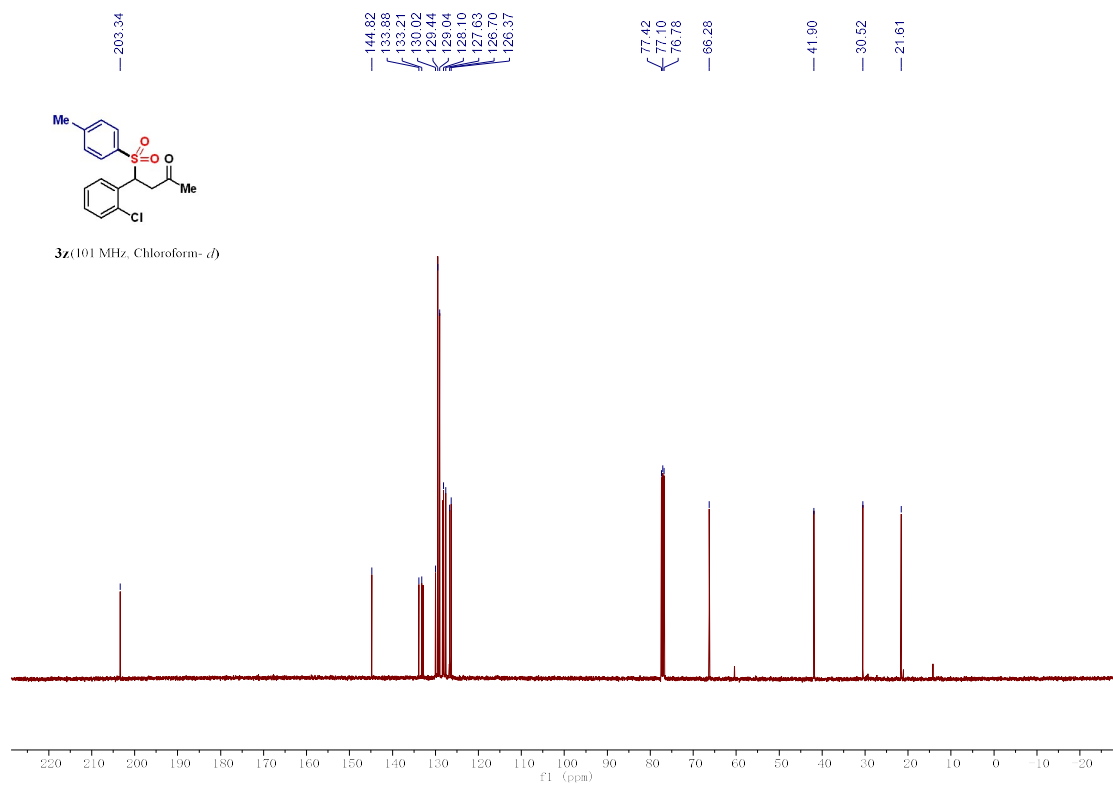

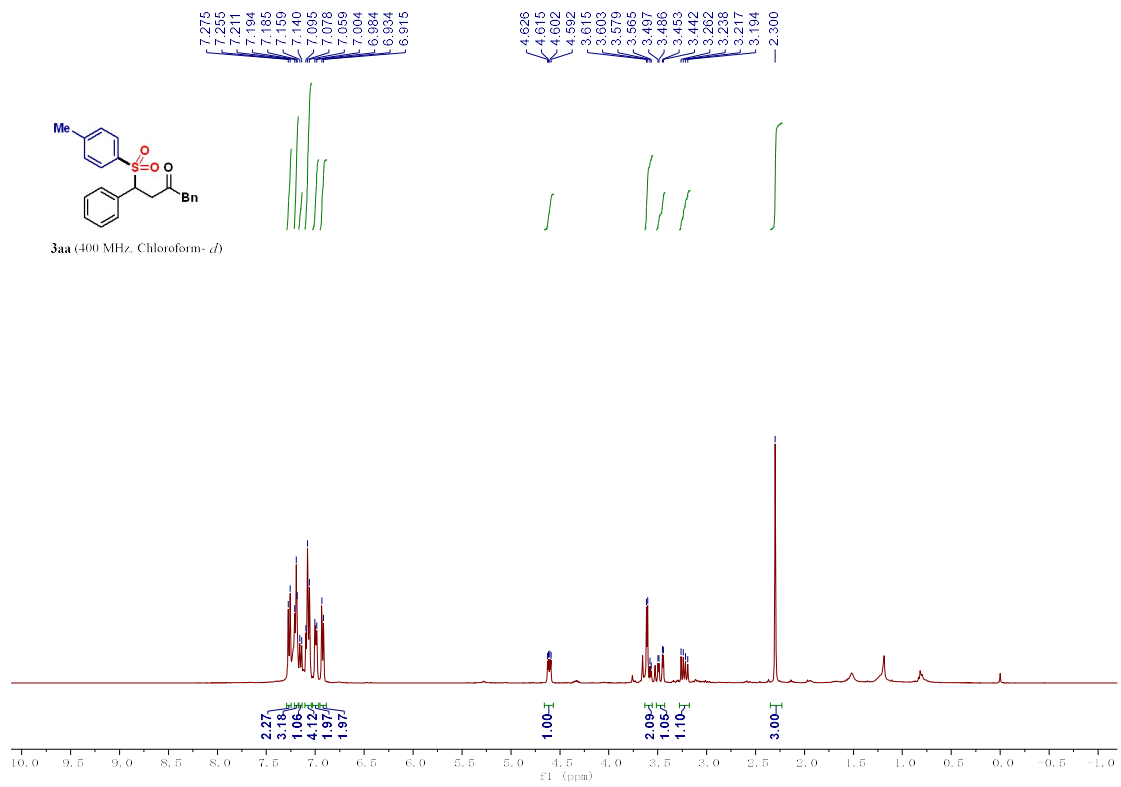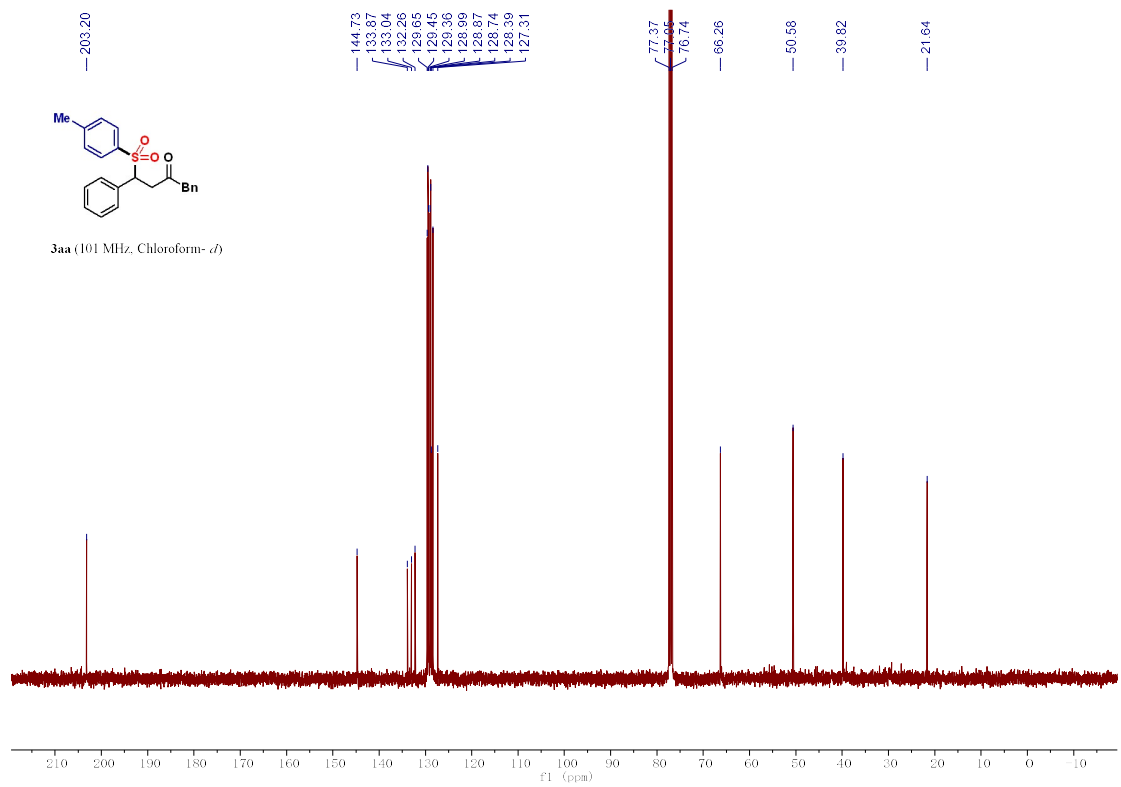

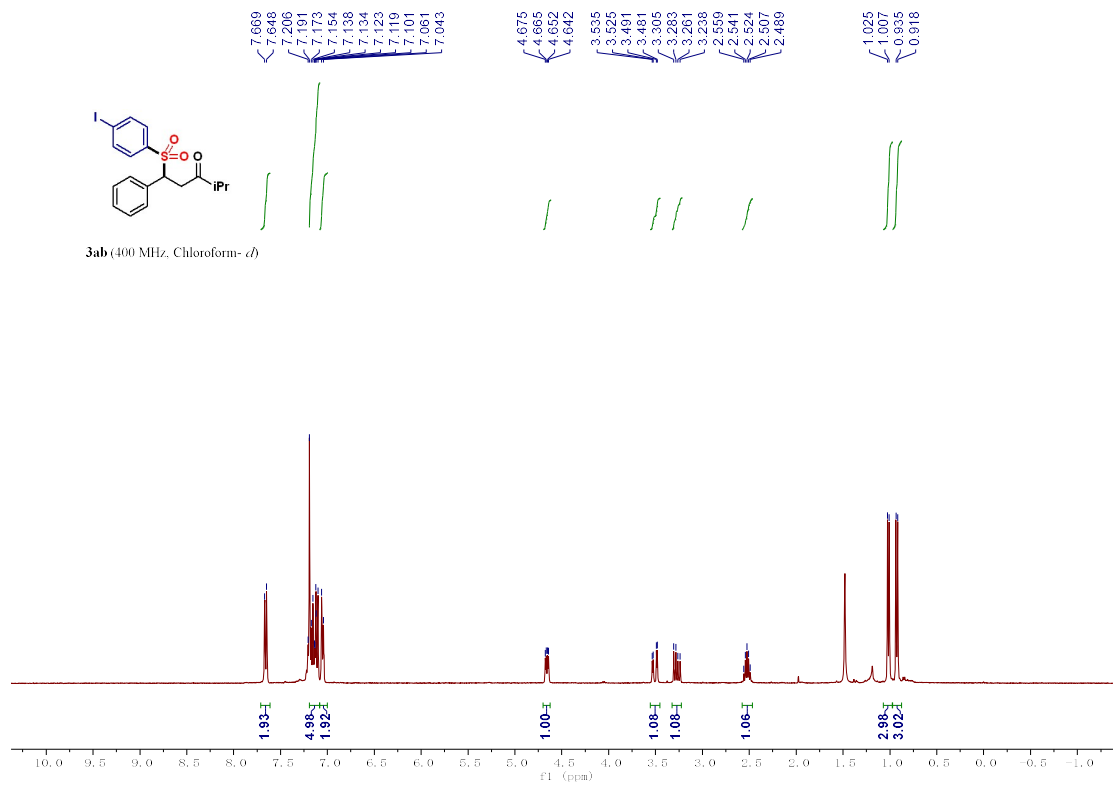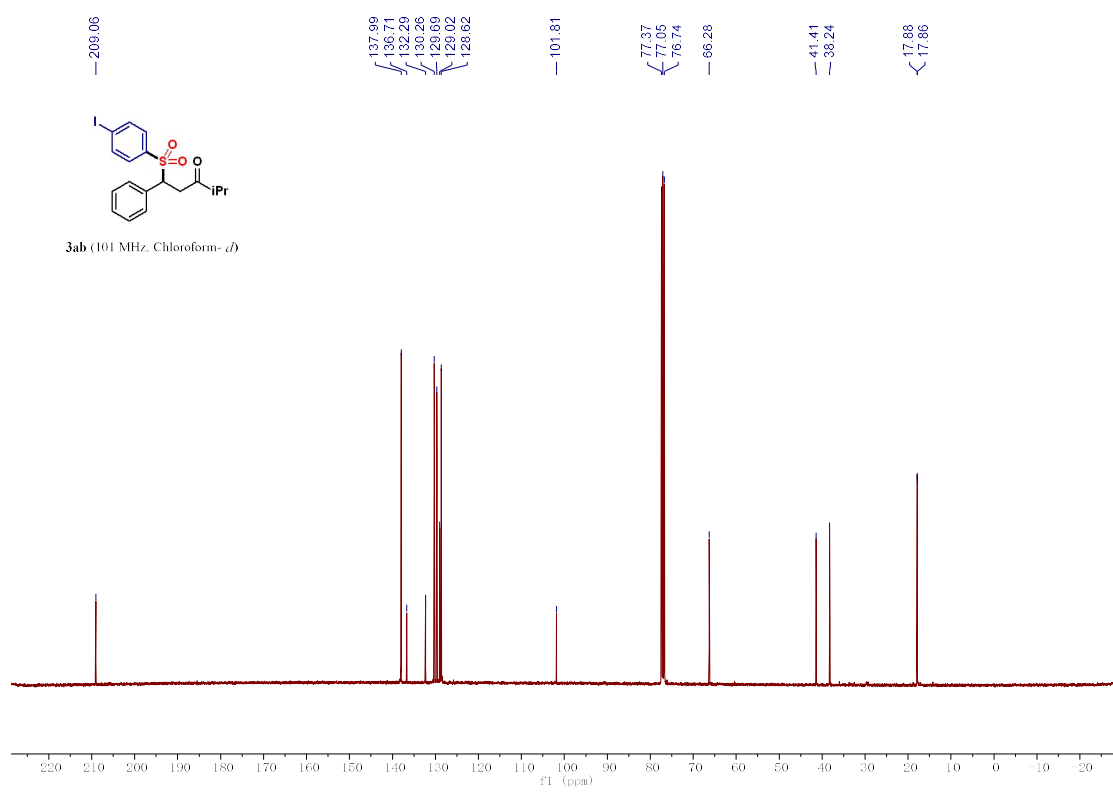

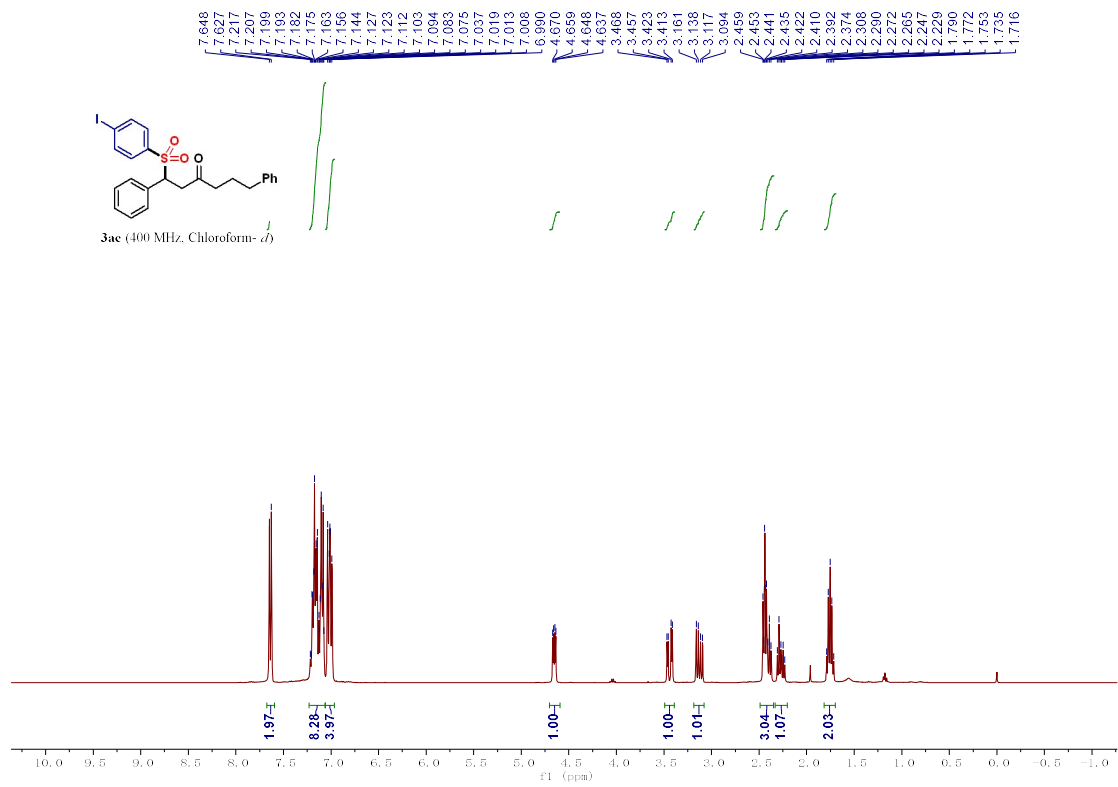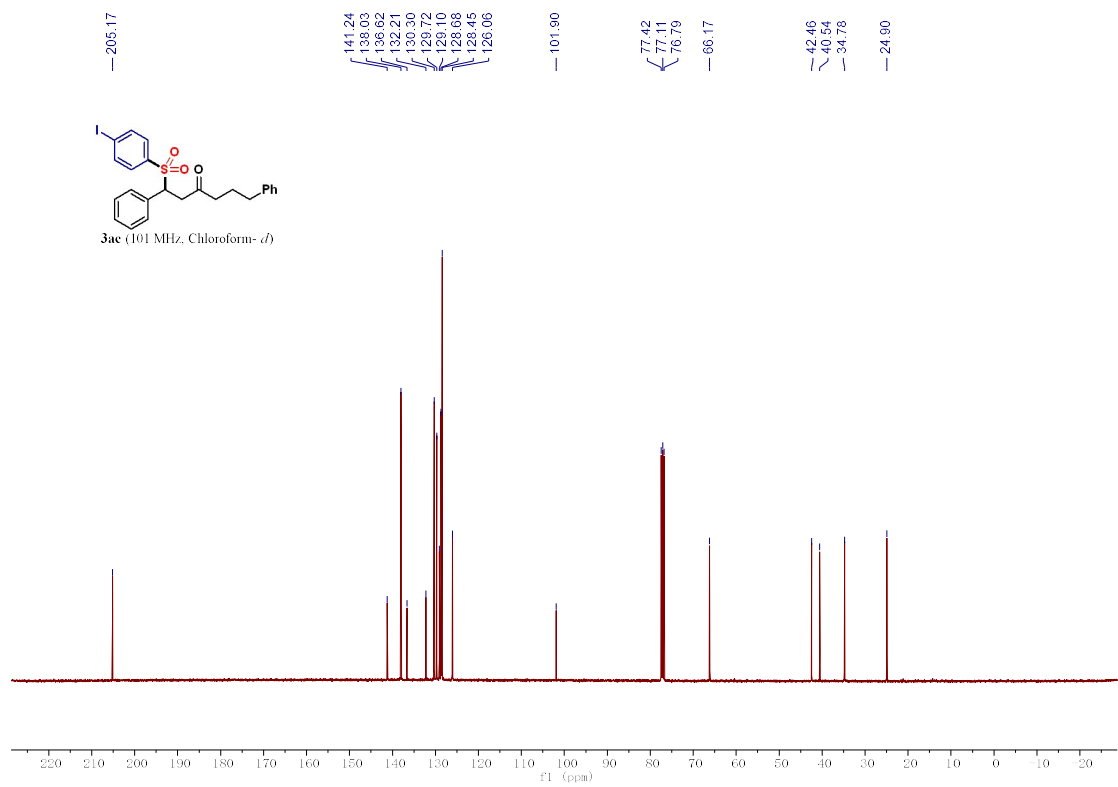

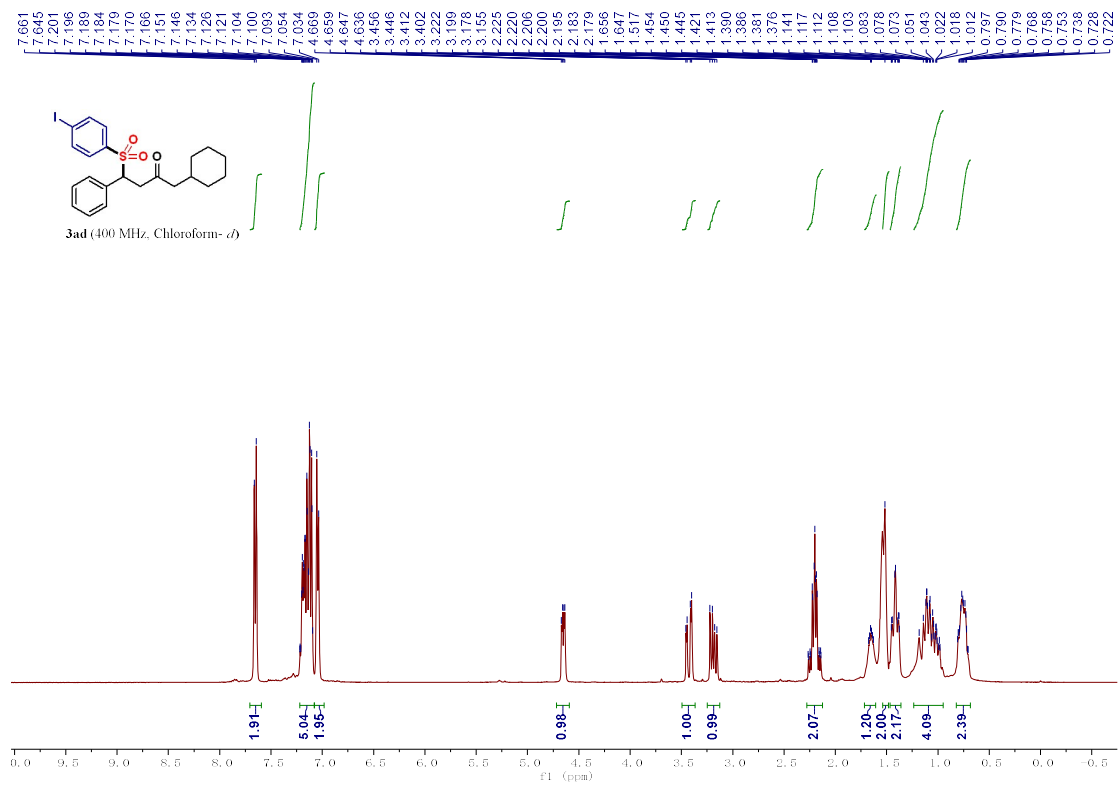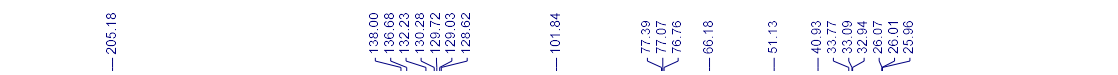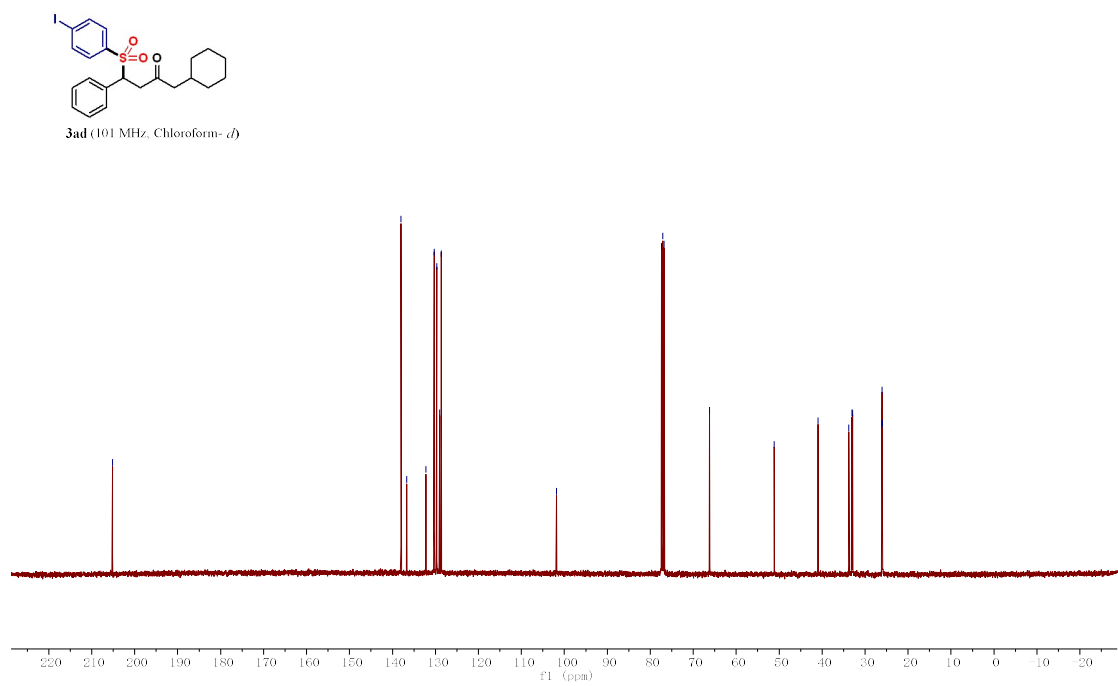



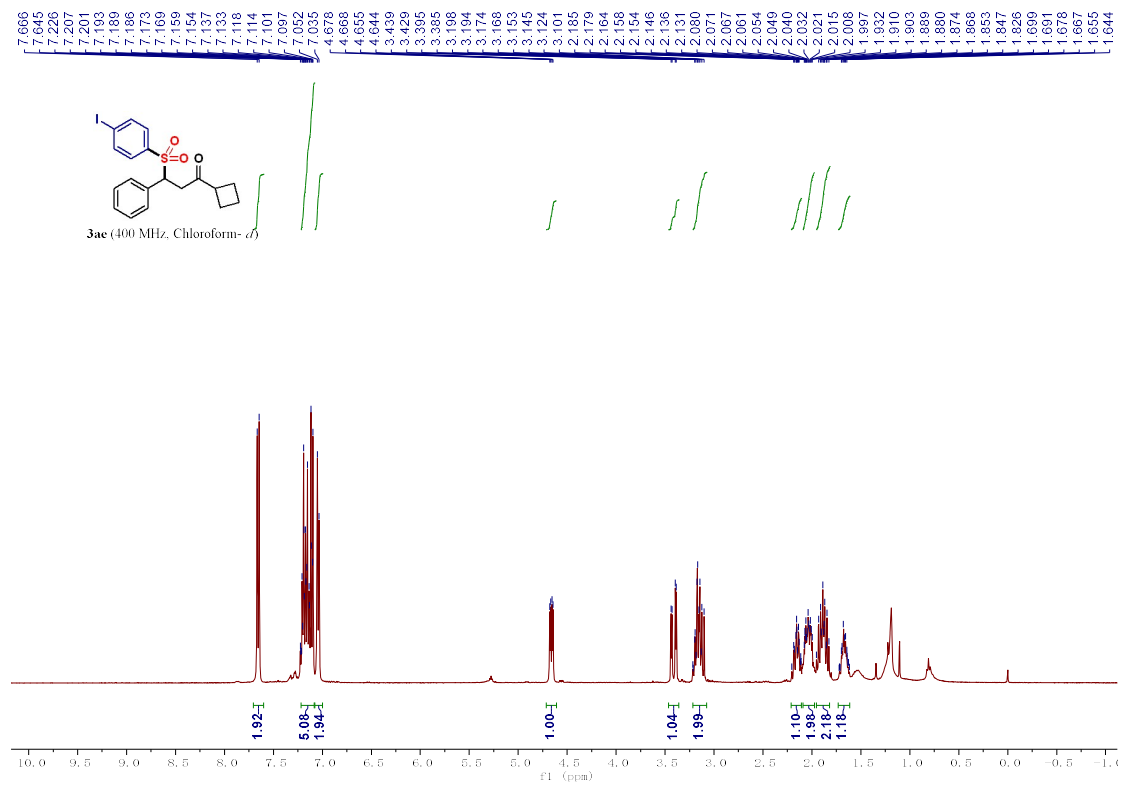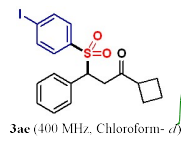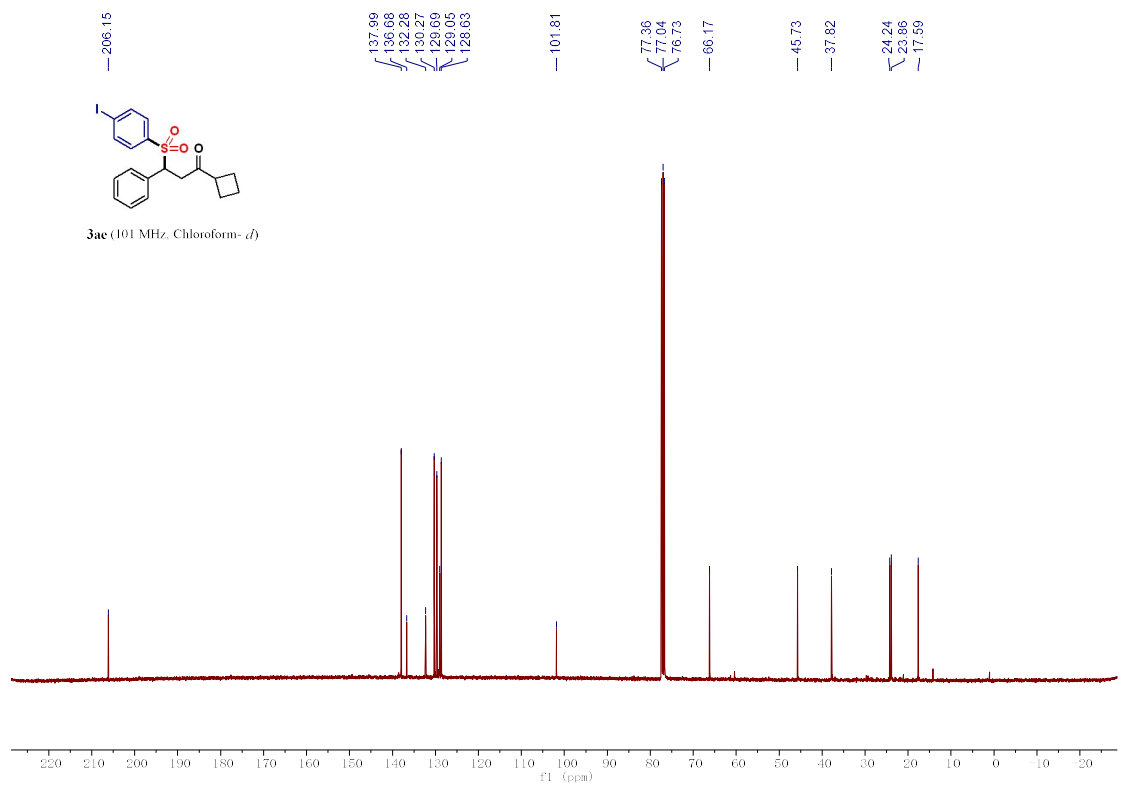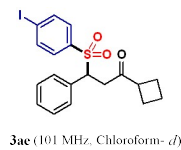

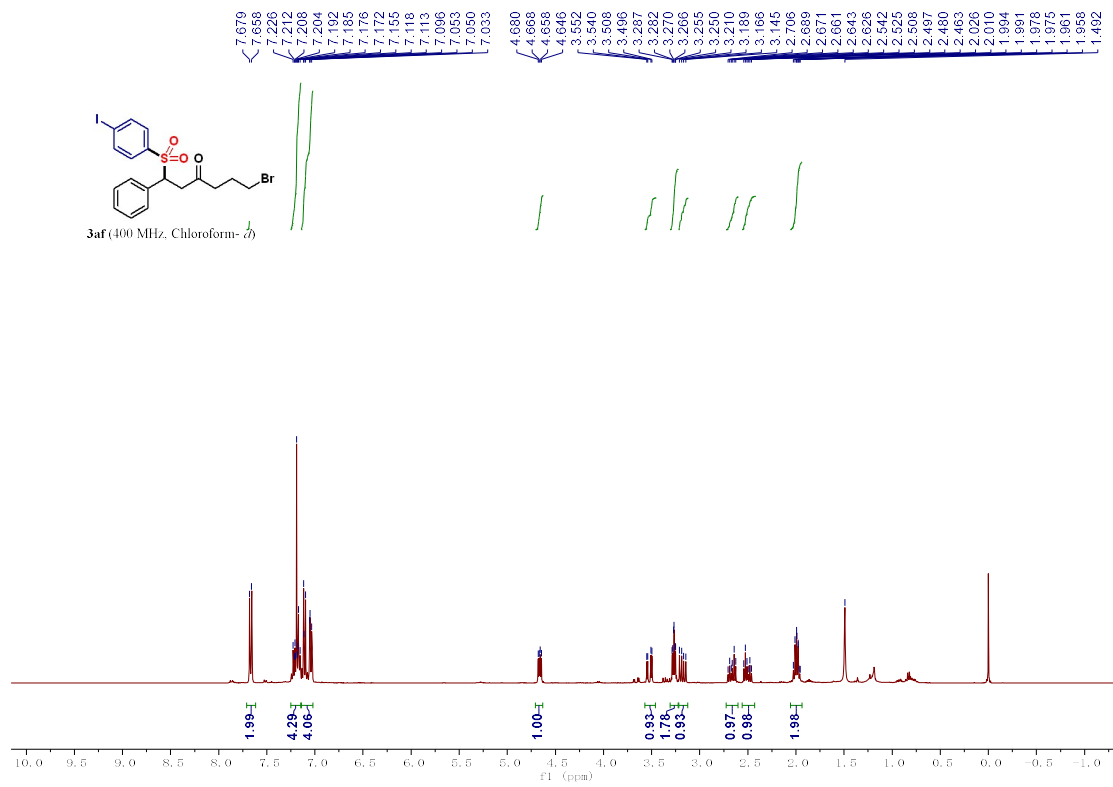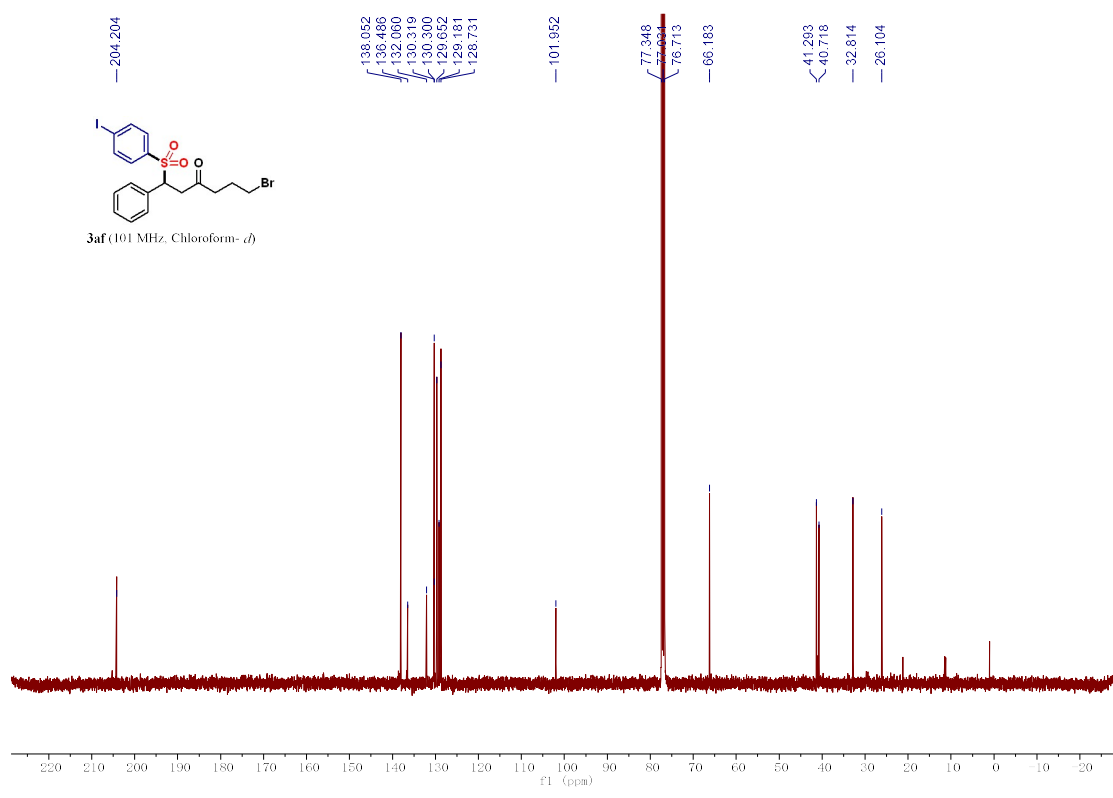

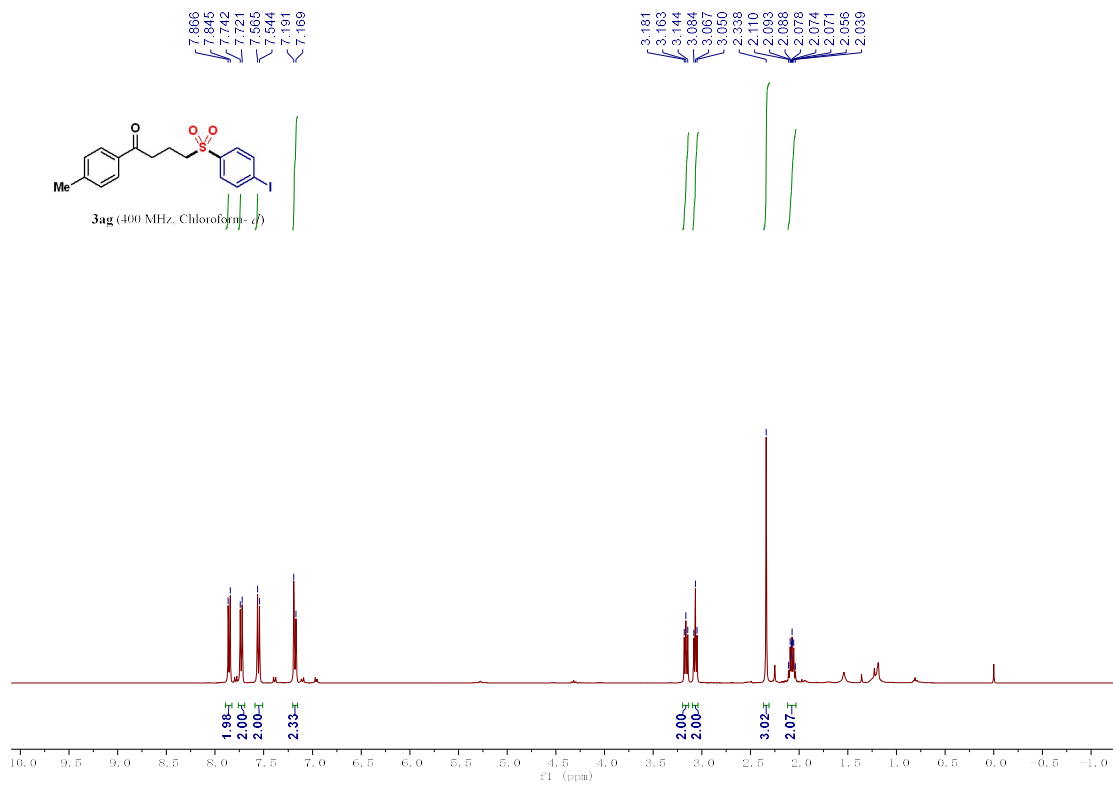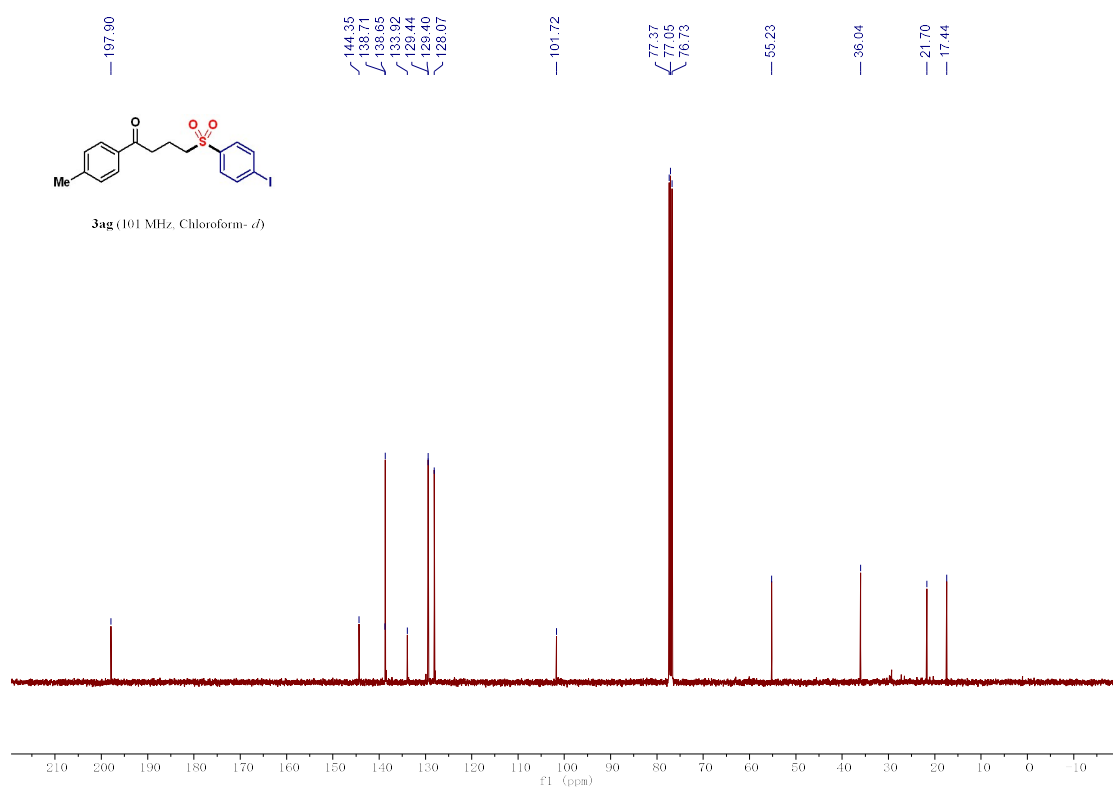

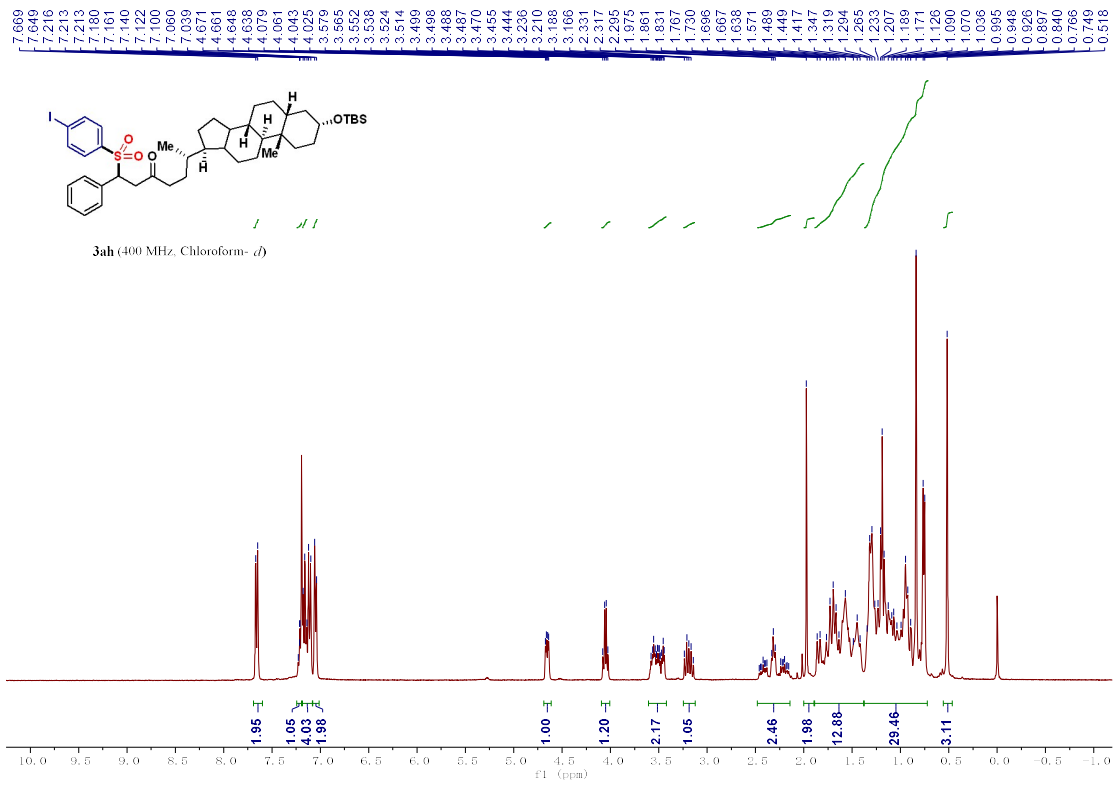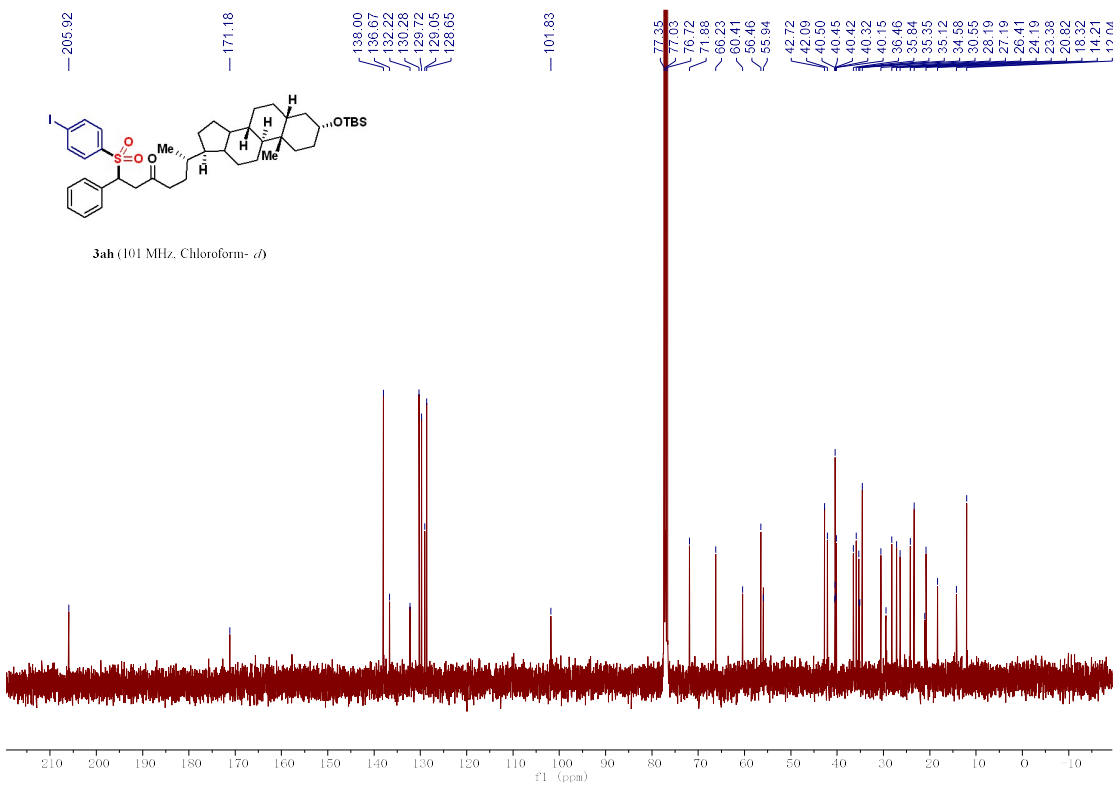

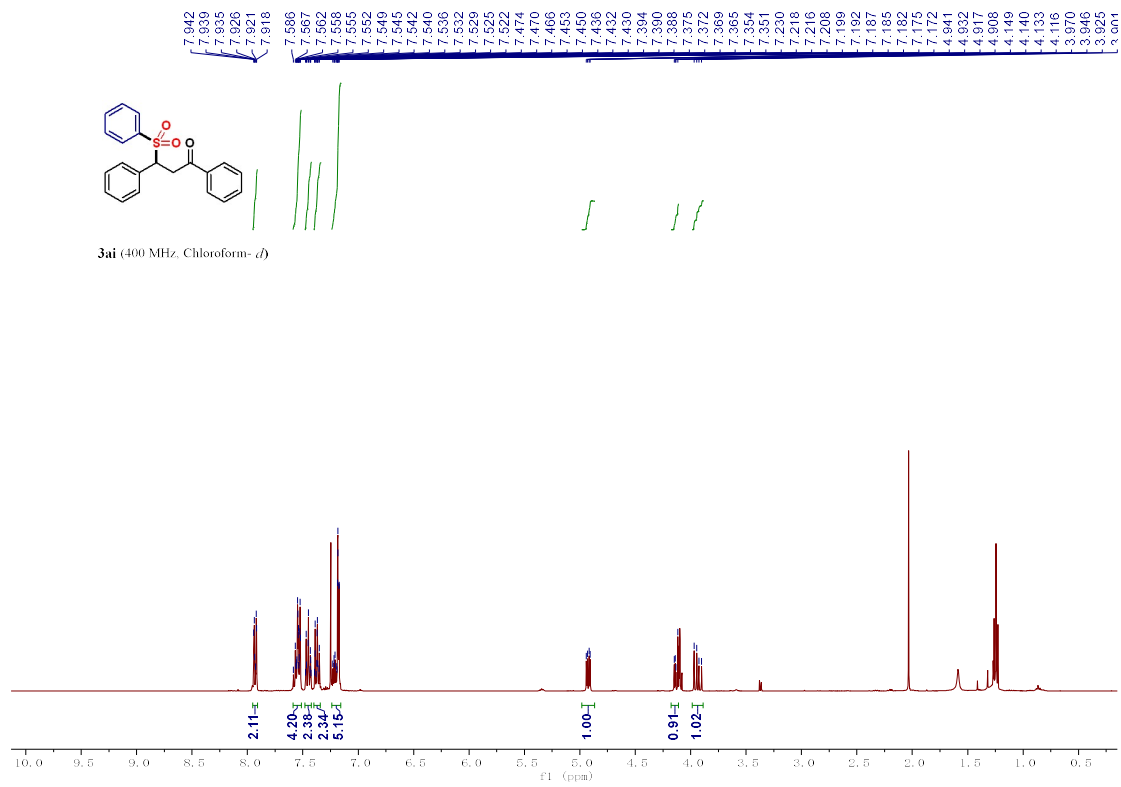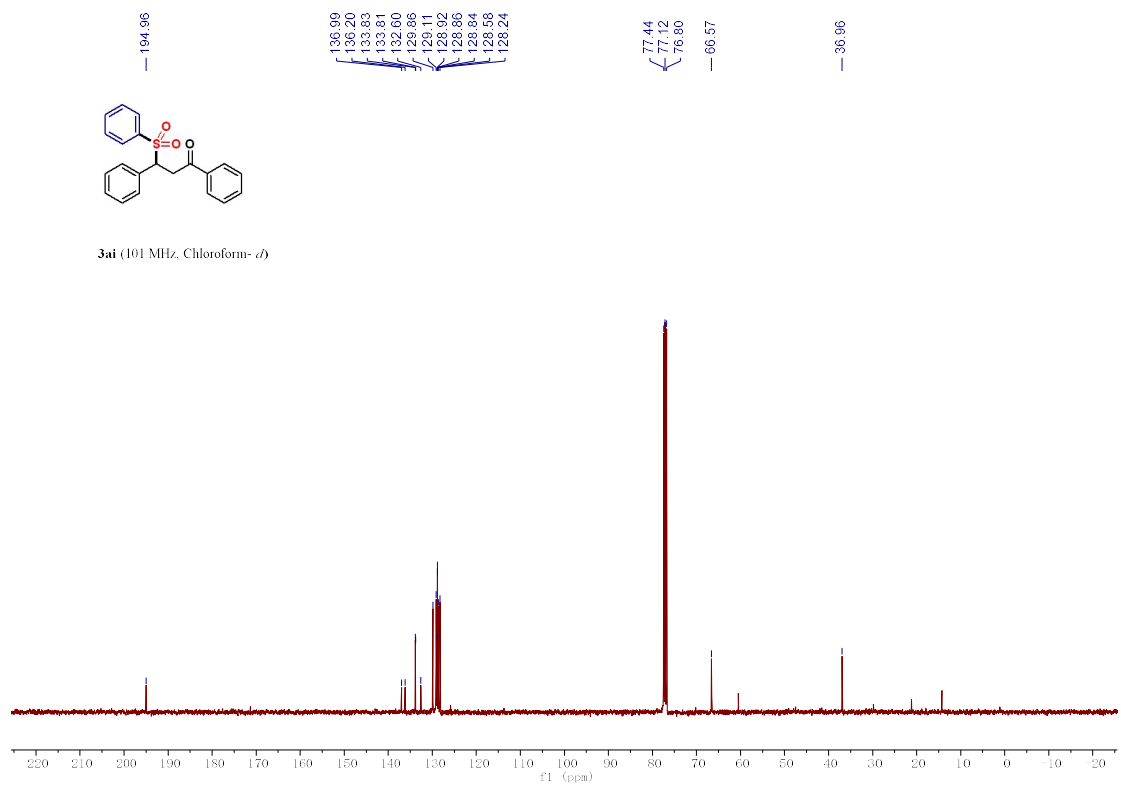

Supplement: d3qo00552f1.pdf [file d3qo00552f1.pdf]
